# Supplementary material for: Impact of the 2017 ACC/AHA guideline on the prevalence of elevated blood pressure and hypertension: a cross-sectional analysis of 10 799 individuals
Source: PubMed Central journal article supplement — BMJ Open. 2020 Dec 30;10(12):e041973. doi: 10.1136/bmjopen-2020-041973 (PMC7780512; doi:10.1136/bmjopen-2020-041973), 2020-12-30
Supplement: bmjopen-2020-041973.draft_revisions.pdf [file bmjopen-2020-041973.draft_revisions.pdf]

# BMJ Open

BMJ Open is committed to open peer review. As part of this commitment we make the peer review history of every article we publish publicly available.

When an article is published we post the peer reviewers' comments and the authors' responses online. We also post the versions of the paper that were used during peer review. These are the versions that the peer review comments apply to.

The versions of the paper that follow are the versions that were submitted during the peer review process. They are not the versions of record or the final published versions. They should not be cited or distributed as the published version of this manuscript.

BMJ Open is an open access journal and the full, final, typeset and author-corrected version of record of the manuscript is available on our site with no access controls, subscription charges or pay-per-view fees (<http://bmjopen.bmj.com>).

If you have any questions on BMJ Open's open peer review process please email [info.bmjopen@bmj.com](mailto:info.bmjopen@bmj.com)

# BMJ Open

## Impact of the 2017 ACC/AHA guidelines on the prevalence of prehypertension and hypertension: a cross-sectional analysis of 10799 individuals.

|                               |                                                                                                                                                                                                                                                                                                                                                                                                                                                                                                                                                                                                                                                                                                                                  |
|-------------------------------|----------------------------------------------------------------------------------------------------------------------------------------------------------------------------------------------------------------------------------------------------------------------------------------------------------------------------------------------------------------------------------------------------------------------------------------------------------------------------------------------------------------------------------------------------------------------------------------------------------------------------------------------------------------------------------------------------------------------------------|
| Journal:                      | <i>BMJ Open</i>                                                                                                                                                                                                                                                                                                                                                                                                                                                                                                                                                                                                                                                                                                                  |
| Manuscript ID                 | bmjopen-2020-041973                                                                                                                                                                                                                                                                                                                                                                                                                                                                                                                                                                                                                                                                                                              |
| Article Type:                 | Original research                                                                                                                                                                                                                                                                                                                                                                                                                                                                                                                                                                                                                                                                                                                |
| Date Submitted by the Author: | 25-Jun-2020                                                                                                                                                                                                                                                                                                                                                                                                                                                                                                                                                                                                                                                                                                                      |
| Complete List of Authors:     | Alyabsi, Mesnad; King Abdullah International Medical Research Center, Population Health Research Section; King Saud bin Abdulaziz University for Health Sciences, Gaid, Reham; Princess Noura Bint AbdulRahman University Alghamdi, Jihad; King Abdullah International Medical Research Center; King Saud bin Abdulaziz University for Health Sciences Alqunaibet, Ada; King Abdullah International Medical Research Center Alaskar, Ahmed; King Abdullah International Medical Research Center; King Saud bin Abdulaziz University for Health Sciences Mahmud, Azra; King Abdulaziz Cardiac Center; King Abdullah International Medical Research Center Biobank, The Saudi; King Abdullah International Medical Research Center |
| Keywords:                     | Hypertension < CARDIOLOGY, Protocols & guidelines < HEALTH SERVICES ADMINISTRATION & MANAGEMENT, EPIDEMIOLOGY                                                                                                                                                                                                                                                                                                                                                                                                                                                                                                                                                                                                                    |
|                               |                                                                                                                                                                                                                                                                                                                                                                                                                                                                                                                                                                                                                                                                                                                                  |

SCHOLARONE™  
Manuscripts

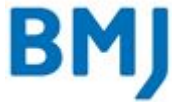

I, the Submitting Author has the right to grant and does grant on behalf of all authors of the Work (as defined in the below author licence), an exclusive licence and/or a non-exclusive licence for contributions from authors who are: i) UK Crown employees; ii) where BMJ has agreed a CC-BY licence shall apply, and/or iii) in accordance with the terms applicable for US Federal Government officers or employees acting as part of their official duties; on a worldwide, perpetual, irrevocable, royalty-free basis to BMJ Publishing Group Ltd ("BMJ") its licensees and where the relevant Journal is co-owned by BMJ to the co-owners of the Journal, to publish the Work in this journal and any other BMJ products and to exploit all rights, as set out in our [licence](#).

The Submitting Author accepts and understands that any supply made under these terms is made by BMJ to the Submitting Author unless you are acting as an employee on behalf of your employer or a postgraduate student of an affiliated institution which is paying any applicable article publishing charge ("APC") for Open Access articles. Where the Submitting Author wishes to make the Work available on an Open Access basis (and intends to pay the relevant APC), the terms of reuse of such Open Access shall be governed by a Creative Commons licence – details of these licences and which [Creative Commons](#) licence will apply to this Work are set out in our licence referred to above.

Other than as permitted in any relevant BMJ Author's Self Archiving Policies, I confirm this Work has not been accepted for publication elsewhere, is not being considered for publication elsewhere and does not duplicate material already published. I confirm all authors consent to publication of this Work and authorise the granting of this licence.

# Impact of the 2017 ACC/AHA guidelines on the prevalence of prehypertension and hypertension: a cross-sectional analysis of 10799 individuals.

Mesnad Alyabsi<sup>1,2</sup>, Reham Gaid<sup>1,3</sup>, Jahad Alghamdi<sup>2,4,5</sup>, Ada Alqunaibet<sup>6</sup>, Ahmed Alaskar<sup>2,4,5</sup>, Azra Mahmud<sup>2,5,7</sup>, and the Saudi Biobank<sup>2,4,5</sup>

<sup>1</sup>Population Health Research Section, King Abdullah International Medical Research Center, Riyadh, Saudi Arabia; P.O. Box 22490, Riyadh 11426.

<sup>2</sup>King Saud bin Abdulaziz University for Health Sciences, Riyadh, Saudi Arabia; P.O. Box 22490, Riyadh 11426.

<sup>3</sup>Princess Nourah Bint Abdulrahman University, Health, and Rehabilitation Sciences College, Riyadh, Saudi Arabia; P.O. Box 84428, Riyadh 11671.

<sup>4</sup>The Saudi Biobank, King Abdullah International Medical Research Center (KAIMRC), Riyadh, Saudi Arabia.

<sup>5</sup>King Abdullah International Medical Research Center, Riyadh, Saudi Arabia; P.O. Box 22490, Riyadh 11426.

<sup>6</sup>Saudi Center for Disease Prevention and Control, Riyadh, Saudi Arabia.

<sup>7</sup>King Abdul Aziz Cardiac Center, King Abdul Aziz Medical City, MNGHA, Riyadh

**Corresponding author:** Mesnad Alyabsi, P.O. Box 3660, Riyadh 11481, Mail Code

1515, Saudi Arabia, Email: mesnadalyabsi@unomaha.edu, Tel: +966(11)429-4326,

FAX: +966(11) 429-4440

**Coauthors:** rehamgaid94@gmail.com; alghamdija@ngha.med.sa; ada\_mq@hotmail.com;

mahmudaz@ngha.med.sa; azramahmud@gmail.com

**(Word Count: 4009)**

## ABSTRACT

**Objectives** To assess the effect of the 2017 ACC/AHA hypertension guidelines on the prevalence of prehypertension and hypertension and the eligibility for the initiation of antihypertensive treatment in the Saudi population.

**Design** A cross-sectional study.

**Participants** A total of 10,799 adults ( $\geq 18$  years old) with three blood pressure readings, during 2017-2020 from the Saudi Biobank (SBB) was used.

**Primary outcome** Hypertension was defined using three sources: the JNC-7 guidelines (SBP $\geq 140$  or DBP $\geq 90$  mmHG), the 2017 ACC/AHA guidelines (SBP $\geq 130$  or DBP $\geq 80$  mmHg), and a self-reported hypertension diagnosis.

**Results** The prevalence of prehypertension, based on the JNC-7 guidelines, was 49.23% (95% CI: 49.04, 49.42), and on the 2017 ACC/AHA guidelines, 15.78% (95% CI: 15.66, 15.91), a reduction of 33.45%. The prevalence of hypertension, according to JNC-7 guidelines, was 14.49% (95% CI: 14.37, 14.61), and the ACC/AHA, 40.77% (95% CI: 40.60, 40.94), an increase of 26.28 %. Using the two definitions, the risk factors are older age, male gender, diabetes diagnosis, increased body mass index (BMI), increased waist circumference, and waist-to-hip ratios. A small proportion (16.42%) of the hypertensive individuals are currently prescribed medications based on the JNC-7, and 67.77% are on recommended treatment according to the ACC/AHA.

**Conclusions** Unless public health prevention efforts are adopted, the increased prevalence of prehypertension and hypertension will increase cardiovascular diseases, a leading cause of mortality globally.

### Strengths and limitations of this study

- The study provide data from the Saudi Biobank on the prevalence and determinants of prehypertension and hypertension for adult females and males.
- We ascertained the hypertensive status using BP measurements, self-report, and antihypertensive use.
- The cross-sectional design limit our ability to assess the temporal relationship between our independent factors and prehypertension/hypertension.

- 1  
2  
3  
4  
5  
6  
7  
8  
9
- There was no ambulatory BP data for the participants, which may overestimate some individuals who may have white coat hypertension; however, the prevalence of white coat hypertension is approximately 3% in a Saudi cohort, which is too small to affect the prevalence data.

10  
11  
12  
13  
14  
15  
16  
17  
18  
19  
20  
21  
22

**Keywords:** Hypertension; Guidelines; Saudi Arabia; Prevention; Biobank; Blood pressure, Cardiovascular, Antihypertensive drugs

## 23 24 25

### INTRODUCTION

26  
27  
28  
29  
30  
31  
32  
33  
34  
35  
36  
37  
38  
39  
40  
41  
42  
43  
44  
45  
46  
47

Hypertension is the most prevalent risk factor for cardiovascular diseases (CVDs). It is the main contributor of CVDs related morbidity and mortality<sup>1</sup> and the cause of more than 9.4 million annual preventable deaths globally<sup>2</sup>. The global number of patients with hypertension is expected to increase by 60% between 2000 and 2025<sup>3</sup>. Risk factors that contribute to the increased prevalence of hypertension are increasing age, male gender, lifestyle factors such as smoking, alcohol consumption, unhealthy diet, sedentary lifestyle, and increased weight<sup>4</sup>. Though the burden of hypertension is substantial, detecting and controlling Blood Pressure (BP) levels at the prehypertension stage will reduce the risk and burden of CVDs<sup>5</sup>.

48  
49  
50  
51  
52  
53  
54  
55  
56  
57  
58  
59  
60

Identifying the optimal BP levels for the definition of prehypertension and hypertension, has been controversial<sup>6</sup>. Based on evidence from Randomized Controlled Trials (RCTs) and other observational studies, the American College of Cardiology and the American Heart Association (ACC/AHA) developed the Hypertension Practice Guidelines in 2017-

1  
2  
3 "The ACC/AHA Guidelines for the Prevention, Detection, Evaluation, and Management  
4 of High Blood Pressure in Adults" <sup>7</sup>. The guidelines lowered the threshold categories of  
5 hypertension from  $\geq 140$  mmHg Systolic Blood Pressure (SBP) or  $\geq 90$  mmHg Diastolic  
6 Blood Pressure (DBP) to  $\geq 130$  mmHg SBP or  $\geq 80$  mmHg DBP. Prehypertension, or  
7 according to the guidelines "elevated BP," is now limited to individuals with a SBP of 120-  
8 129 mmHg and DBP  $< 80$  mmHg instead of 120-139 mmHg or 80-89 mmHg suggested by  
9 the Joint National Committee 7 Blood Pressure Guidelines (JNC-7)<sup>8</sup>. Although not  
10 endorsed by some organizations, the new lower BP categories have been assessed in a  
11 systematic review and meta-analysis and were associated with a lower risk of CVDs<sup>9</sup>.

12  
13  
14  
15  
16  
17  
18  
19  
20  
21  
22  
23  
24  
25 Recent estimates from Saudi Arabia indicate the overall prevalence of prehypertension was  
26 40.6%-54.9%, and hypertension 15.0%-26.1% <sup>10-12</sup>. The current estimates indicate that  
27 men have a higher prevalence of prehypertension and hypertension than women, for  
28 instance, 48.1% of women and 66.1% of men were prehypertensive, with 6%-10.2% of  
29 men and 4.2%-12.8% of women hypertensive <sup>11</sup>. Although the use of ACC/AHA guidelines  
30 is expected to increase the prevalence of prehypertension and hypertension <sup>13</sup>, the amount  
31 of the increase is unclear. It is also not known whether women will have a greater change  
32 in prevalence than men and which individuals' characteristics will have an impact on the  
33 prevalence of hypertension.

34  
35  
36  
37  
38  
39  
40  
41  
42  
43  
44  
45  
46  
47 We designed the current study to measure the prevalence of hypertension and to assess the  
48 change in prevalence according to the ACC/AHA guidelines compared to the Joint  
49 National Committee 7 Blood Pressure Guidelines (JNC-7). We also aimed to evaluate the  
50 determinants of prehypertension and hypertension among the population of the Saudi  
51 Biobank (SBB). Finally, we aimed to measure the use of antihypertensive medications and

1  
2  
3 compare the use with the recommended medication according to the ACC/AHA guidelines.  
4  
5 The results will be useful for public health officials and health care providers to plan and  
6  
7 implement primary, secondary and tertiary prevention interventions. These interventions  
8  
9 reduce the burden of hypertension in addition to the morbidity and mortality associated  
10  
11 with CVDs.  
12  
13

## 14 **MATERIALS AND METHODS**

### 15 **Data sources**

16  
17 The Institutional Review Board of King Abdullah International Medical Research Center  
18  
19 (IRB#139 RC19/028/R) approved the study. The study has a cross-sectional design using  
20  
21 data from the SBB. The SBB is an ongoing project to investigate the current health  
22  
23 behavior of the Saudi population. The project aims to investigate the fundamental  
24  
25 mechanisms of diseases by combining bio-specimens and survey data, sociodemographic  
26  
27 and medical history information. The current study only used the survey data available  
28  
29 from the survey part of the SBB.  
30  
31  
32  
33  
34  
35

### 36 **Patient and Public Involvement**

37  
38 No patient involved.  
39  
40

### 41 **Survey development and administration**

42  
43 The SBB research team created the survey based on a previously developed and validated  
44  
45 questionnaire. The questionnaire partly corresponds to other similar population biobank  
46  
47 projects to allow for comparability between the Saudi population and other populations.  
48  
49 The preliminary survey questions were pilot tested, and the questions were revised  
50  
51 according to the findings. The questionnaire includes the following sections: Date and  
52  
53 Location of Recruitment, Demographic Information, Family Information, Housing  
54  
55  
56  
57  
58  
59  
60



1  
2  
3 Information, General Health Status, Personal and Family Medical History, History of  
4  
5 Personal and Family Medications Use, Disabilities, Others, Women and Men Health,  
6  
7 Health Behaviors, Nutrition, Physical Activity, and Anthropometric Measurements.  
8  
9

10 The questionnaire items are primarily closed-ended questions with Likert scale responses.  
11  
12 For example, to assess a person's overall health status, a 5-point Likert scale rating was  
13  
14 used with the designation of Excellent, Very Good, Good, Not Too Bad, and Weak. To  
15  
16 evaluate the time a person spends sitting, standing, or walking while at work, a 5-point  
17  
18 Likert scale rating was used as Never, Few Times, Sometimes, Most Times, and All Times.  
19  
20 The questionnaire is administered to participants by trained research coordinators. Before  
21  
22 obtaining consent and completing the questionnaire, the coordinators describe the SBB  
23  
24 objectives, the benefits of study participation, the security and privacy of collected  
25  
26 information, voluntary participation, and the unconditional withdrawal from the study.  
27  
28  
29  
30

### 31 **Study population and data extraction**

32  
33

34 The study population are adults ( $\geq 18$  years old) who participated in the survey from  
35  
36 December 10th, 2017 to January 29th, 2020 with three recorded BP measurements. The  
37  
38 data related to the prescribed antihypertensive medications was extracted from the  
39  
40 electronic medical records.  
41  
42  
43

### 44 **Measurement method for blood pressure**

45  
46

47 The BP was measured using a calibrated sphygmomanometer and arm cuffs (Omron 705it  
48  
49 or Omron M3). Research coordinators are trained to measure the BP once the participants  
50  
51 are rested, with legs uncrossed. The average of the three BP measurements was computed  
52  
53 and used as the final BP reading.  
54  
55  
56  
57  
58  
59  
60

### **Blood pressure classification**

Using the JNC-7 guidelines, BP was categorized into four categories: normal (SBP<120 and DBP<80 mmHg), prehypertension (SBP=120-139 or DBP=80-89 mmHg), stage 1 (SBP=140-159 or DBP=90-99 mmHg) and stage 2 (SBP $\geq$ 160 or DBP $\geq$ 100 mmHg) <sup>8</sup>.

Using the ACC/AHA guidelines, BP was also categorized into four categories: normal (SBP<120 and DBP<80 mmHg), elevated (SBP=120-129 and DBP<80 mmHg), stage 1 (SBP=130-139 or DBP=80-89 mmHg) and stage 2 (SBP $\geq$ 140 or DBP $\geq$ 90 mmHg) <sup>7</sup>.

Individuals with BP measurements in stage 1 or stage 2 were considered as diagnosed with hypertension.

### **Data collection and definitions**

The participants' sociodemographic information, including age, gender, marital status, education level, occupation, and family income, was extracted from the SBB data. In addition, behavioral health factors such as physical activities, smoking status, including shisha use, dietary intake, and comorbidities, were retrieved. The waist and hip circumferences, height, and weight measurements were categorized as suggested by Lear et al. <sup>14</sup>. Comorbidities such as a diagnosis of diabetes mellitus or any CVD were self-reported.

Age was reported as a continuous variable and categorized into 18-29, 30-39, 40-49, 50-59, and  $\geq$ 60-year. Marital status was classified into three categories; married as one category, never married and divorced as another category, and separated and widowed as a single category. Employment status included retired, unemployed-wives, and others combined into one category, never employed and ex-employed in one category, business

1  
2  
3 owner, and currently employed as one category and student as a single category.  
4  
5 Educational attainment was categorized into seven groups: literate and low literacy under  
6  
7 a separate category called less than primary school (<primary school), primary,  
8  
9 intermediate, high school, some college, bachelor's degree, and higher education. The daily  
10  
11 consumption of tea or Arabic coffee was categorized in: none, 1-2 servings, 3-4 servings,  
12  
13 5-6 servings, 7-9 servings, and  $\geq$ ten servings; the daily intake of fruit and vegetables 0-1,  
14  
15 2, 3 and  $\geq$ 4; the daily soda and black coffee consumption in none, 1-2, 3-4 and  $\geq$ 5.  
16  
17 Additionally, weekly vigorous-, moderate-, or light-exercises that lasted more than 15  
18  
19 minutes was categorized in never, 1, 2-3, 4-5, and  $>$  5. Time spent sitting, standing, or  
20  
21 walking while at work was categorized into never, a few times, sometimes, most of the  
22  
23 time and all the time.  
24  
25  
26  
27  
28

### 29 **Prescription data**

30  
31  
32 We used the medical records and pharmacy data to identify participants with an  
33  
34 antihypertensive medication prescription. We identified patients with a diagnosis of  
35  
36 hypertension in their medical file and at least one prescription of antihypertensive  
37  
38 medication were also identified <sup>15</sup>. The antihypertensive drugs used were beta-blockers,  
39  
40 calcium channel blockers, angiotensin-converting enzyme inhibitors, angiotensin receptor  
41  
42 blockers, diuretics, and centrally or peripherally acting agents found in the pharmacy files  
43  
44 during the diagnosis year.  
45  
46  
47  
48

### 49 **Data analysis**

50  
51 The data were analyzed using SAS statistical software version 9.4 (SAS Institute Inc. Cary,  
52  
53 NC). Descriptive data for the sample, stratified by gender are presented as frequency and  
54  
55 percentage for categorical variables, and continuous variables are presented as a mean and  
56  
57  
58  
59  
60

1  
2  
3 standard deviation (SD). Also, for each BP category the mean, SD, median, interquartile  
4 range (IQR), minimum and maximum value was calculated. Hypertension was defined as  
5  
6 SBP  $\geq$ 130 mmHg or DBP  $\geq$ 90 mmHg according to ACA/AHA and SBP  $\geq$ 140 mmHg or  
7  
8 DBP  $\geq$ 90 mmHg, based on JNC-7 guidelines <sup>7,8</sup>. The prevalence of hypertension was  
9  
10 calculated by dividing the total number of hypertensive individuals by the total of the  
11  
12 normotensive and prehypertensive individuals. The prevalence of prehypertension was  
13  
14 measured by dividing the total number of prehypertensive by normotensive individuals.  
15  
16 The prevalence of hypertension and prehypertension and the 95% CI were calculated using  
17  
18 the Wald binomial method.  
19  
20  
21  
22  
23

24 Missing covariates data were handled using the multiple imputation by chained equations  
25  
26 (fully conditional method), assuming that data are missing at random (MAR). The missing  
27  
28 data ranges from 0% to 30%, and 30 imputations were conducted. Given the arbitrary  
29  
30 pattern of the missing data, the PROC MI procedure was used with the "FCS regpmm"  
31  
32 statement for continuous variables and the "FCS logistic" for categorical variables<sup>16</sup>.  
33  
34 Univariate and multivariate logistic regressions were conducted using the multiple imputed  
35  
36 data to estimate the odds ratio (OR) and the adjusted odds ratio (AOR). Backward  
37  
38 elimination was used to determine variables included at the multivariate level. Collinearity  
39  
40 was assessed using the SAS Macro condition indices (CNIs) and variance decomposition  
41  
42 proportions (VDPs) with CNIs of  $>$ 30 and at least two VDPs  $\geq$ 0.50 indicating collinearity  
43  
44 <sup>17</sup>. The linearity of continuous variables with the log odds of the outcome variables was  
45  
46 checked using the fractional polynomial method <sup>18</sup>. All statistical tests were 2-sided, and  
47  
48 findings were considered statistically significant at  $P < .05$ . STROBE cross-sectional  
49  
50 guidelines were used to assure that all essential elements are reported and covered <sup>19</sup>.  
51  
52  
53  
54  
55  
56  
57  
58  
59  
60

## RESULTS

### Descriptive statistics

A total of 11571 individuals were captured in the SBB. After excluding individuals <18 years old (n=327) and with less than three BP readings (n=445), the final sample was 10799 individuals (women=5302 and men=5497). The overall characteristics of the study sample stratified by gender are summarized in Table 1 and Table 2. The average age was 30 years, and the majority (94%) were younger than 40 years. Compared to women, men were more likely to never have been married, presently employed, and have higher incomes but lower educational status than women. A small proportion (1.24%) of the women smoked compared to 30.74% of the men, who were more likely to report being physically active and less likely to be obese. Table 3 presents the BP measurements based on JNC-7 and ACC/AHA guidelines; the mean BP of stage 1 hypertensive patients based on the JNC-7 classification was  $140.1 \pm 10.5 / 87.9 \pm 7.7$  mmHg compared to  $126.5 \pm 9 / 80.9 \pm 5.9$  mmHg according to the ACC/AHA guidelines. The prevalence of hypertension increased from 14.49% (95% CI: 14.37-14.61) based on the JNC-7 guidelines to 40.77% (95% CI: 40.60-40.94) based on ACC/AHA guidelines; an increase of 26.28% (Table 4). The difference in the prevalence of prehypertensive patients was from 15.78% based on the JNC-7 guidelines to 49.23% based on the ACC/AHA guidelines (Table 5).

### Hypertension in men and women from different age groups

Figure 1 demonstrates the prevalence of hypertension in males and females from different age groups using the JNC-7 and ACC/AHA guidelines. For females, using the JNC-7, the prevalence of hypertension was the highest in 50-59 year age group (33.4%); however, using the ACC/AHA, the prevalence of hypertension in the same age group increased to

1  
2  
3 63.40% and became the second highest prevalence. In terms of the males, using the JNC-  
4  
5 7, the 50-59 year age group, had the highest hypertension prevalence (40.46%) the same  
6  
7 age groups had the highest prevalence for hypertension (70.99%) when using the  
8  
9 ACC/AHA guidelines.  
10

### 11 **BP stages in different age groups using the 2017 ACC/AHA guidelines**

12  
13  
14 Figure 2 illustrates the prevalence of the BP stages in different age groups. In the age group  
15  
16 of 60 and older, 10.98% were prehypertensive, 34.92% in stage 1, and 34.15 % in stage 2  
17  
18 of hypertension, with only 19.96% normotensive. In contrast, in the 30-39 year age group,  
19  
20 13.94% were prehypertensive, 28.9% in stage 1, 14.62% at stage 2, and 42.54%  
21  
22 normotensive.  
23  
24  
25

### 26 **BP stages in male and female using the 2017 ACC/AHA guidelines**

27  
28 Figure 3 demonstrates the prevalence of BP stages in males and females. In the females,  
29  
30 52.24% had a normal BP, 14.03% were prehypertensive, 23.15% in stage 1, and 10.58%  
31  
32 at stage 2 of hypertension. For the males, however, 34.74% of the males had normal BP,  
33  
34 17.5% prehypertensive, 29.27% in stage 1, and 18.48% at stage 2 hypertension.  
35  
36  
37

### 38 **Determinants of hypertension and prehypertension/elevated BP**

39  
40 Hypertension determinants, according to the ACC/AHA and JNC-7 guidelines are  
41  
42 presented in Table 4 (adjusted for all variables shown in the tables). According to the  
43  
44 ACC/AHA guidelines, the determinants of hypertension were increasing age, male gender,  
45  
46 being a student or unemployed, having diabetes, increasing BMI, particularly with  
47  
48 abdominal adiposity. The odds of hypertension were significantly highest for adults who  
49  
50 were in the 50 to 59-year age group *vs.* the 18-29- year age group (adj OR: 2.28, 95% CI:  
51  
52 1.72,3.03), men *vs.* women (adj OR: 2.79 95% CI: 2.51,3.11) and students *vs.* employed  
53  
54  
55  
56  
57  
58  
59  
60

1  
2  
3 (adj OR: 1.36, 95% CI: 1.14,1.63). Notably, diabetic adults were 67% more likely to  
4 develop hypertension compared to non-diabetics (adj OR:1.67, 95% CI: 1.37,2.04), and  
5 obese (adj OR: 3.17, 95% CI: 2.52,3.99) or extremely obese (adj OR: 4.64, 95% CI:  
6 3.31,6.52) compared to the underweight individuals. Individuals with a high waist  
7 circumference and a high waist-to-hip were 32% (adj OR: 1.32, 95% CI: 1.17, 1.50) and  
8 27% (adj OR: 1.27, 95% CI: 1.13, 1.43) more likely to develop hypertension compared to  
9 their counterparts. Unlike the JNC-7 guidelines, per the 2017 ACC/AHA guidelines,  
10 individuals practicing vigorous weekly-exercise were consistently less likely to develop  
11 hypertension.  
12

13  
14  
15  
16  
17  
18  
19  
20  
21  
22  
23  
24 Determinants of hypertension based on JNC-7 guidelines were increasing age, male  
25 gender, employment status, time spent standing while at work, diabetes, and increasing  
26 BMI, mostly central obesity. For instance, the odds of hypertension were highest in the 50-  
27 59 year age group (adj OR: 3.23, 95% CI: 2.34, 4.44) compared to adults 18-29 years old,  
28 in men vs. women (adj OR: 3.10, 95% CI: 2.66, 3.60), in unemployed compared to  
29 employed (adj OR: 1.35, 95% CI: 1.03, 1.78), and for individuals standing at work most of  
30 the time compared to never (adj OR: 2.66, 95% CI: 1.48, 4.76). In addition, diabetic adults  
31 were 64% more likely to develop hypertension compared to non-diabetics (adj OR: 1.64,  
32 95% CI: 1.34,2.00), adults who are obese (adj OR: 2.97, 95% CI: 2.04,4.34), or extremely  
33 obese (adj OR: 5.24, 95% CI: 3.35,8.19), compared to underweight and individuals with  
34 an abnormal waist circumference (adj OR: 1.53, 95% CI: 1.29,1.81), or waist-to-hip ratio  
35 (adj OR: 1.19, 95% CI: 1.02,1.38) compared to their counterparts. Contrary to the 2017  
36 ACC/AHA guidelines, using the JNC-7 guidelines, married individuals were less likely  
37 than never-married individuals to develop hypertension.  
38  
39  
40  
41  
42  
43  
44  
45  
46  
47  
48  
49  
50  
51  
52  
53  
54  
55  
56  
57  
58  
59  
60

1  
2  
3 Finally, the predictors of prehypertension/elevated BP, adjusted for all covariates in the  
4 table, are presented in Table 5. Elevated BP determinants (according to ACC/AHA) were  
5 being male, a student or unemployed, sitting at work a few times, sometimes or most of  
6 the time, and having an increased BMI. The odds of elevated BP were significantly highest  
7 in men compared to women (adj OR: 2.86, 95% CI: 2.45, 3.33), in students vs. employed  
8 (adj OR: 1.63, 95% CI: 1.27, 2.10) and in individuals who sometimes sat at work (adj OR:  
9 2.56, 95% CI: 1.21, 5.44) compared to never. Both obese and extremely obese individuals  
10 had increased odds of elevated BP by 3.33 fold (95% CI: 2.44, 4.54) and 4.76 fold (95%  
11 CI: 2.84, 7.98), compared to underweight individuals.

12  
13 In contrast, the prehypertension determinants based on the JNC-7 guidelines were male  
14 gender, being student or unemployed, having diabetes, increased BMI, with an abnormal  
15 waist circumference or waist-to-hip ratio. Men had three times the odds of prehypertension  
16 compared to women (adj OR: 3.00, 95% CI: 2.67, 3.37). Besides, being a student increased  
17 the odds of 58% (adj OR: 1.58, 95% CI: 1.31, 1.90) compared to the employed. The odds  
18 of prehypertension were significantly higher for diabetic individuals (adj OR: 1.29, 95%  
19 CI: 1.04, 1.59), individuals with an increased BMI, and individuals with and abnormal  
20 waist circumference or waist-to-hip ratio. Finally, individuals who reported moderate  
21 weekly-exercises, and who reported to consume fruit and vegetables, were all less likely to  
22 develop prehypertension compared to their counterparts.

### 23 **Medication utilization**

24  
25 According to the JNC-7 guidelines, the sample included 435 adults with a self-reported  
26 diagnosis of hypertension by a healthcare provider (Figure 4). The majority (n=359) did  
27 not have antihypertensive medication records, and 172 of the 359 were not hypertensive  
28  
29  
30  
31  
32  
33  
34  
35  
36  
37  
38  
39  
40  
41  
42  
43  
44  
45  
46  
47  
48  
49  
50  
51  
52  
53  
54  
55  
56  
57  
58  
59  
60



1  
2  
3 based on their BP measurements. Accordingly, 76 of the 1565 hypertensive patients (per  
4 JNC-7) had records of antihypertensive medication use and were hypertensive. The  
5 majority (60.5%) had uncontrolled hypertension. Most of the adults with uncontrolled  
6 hypertension were male (65.1%), with an average age of 40.8 (men: 42.5, women: 39.75),  
7 and had an average SBP of 151.03 and DBP of 97.64 mmHg. The comparisons of adults  
8 who are on the recommended antihypertensive medications (using ACC/AHA) compared  
9 to individuals actually prescribed the medications are displayed in Figure 5.  
10  
11  
12  
13  
14  
15  
16  
17  
18

## 19 **DISCUSSION**

20  
21 The current study assessed the impact of the 2017 ACC/AHA guidelines definitions of  
22 prehypertension and hypertension and the level of awareness and control of hypertension  
23 of Saudi adults. The implementation of the 2017 ACC/AHA guidelines will result in an  
24 increase of 26.28% in the prevalence of hypertension, which is an increase from 1.8 million  
25 hypertensive adults into 5.1 million adults according to the latest census estimates of Saudis  
26  $\geq 18$  years old <sup>21</sup>. The increase is predominantly observed in men (47.72%) vs. women  
27 (33.57%), in individuals  $\geq 60$  years old (70.13%), diabetics (62.37%), and individuals who  
28 are obese (56.12%).  
29  
30  
31  
32  
33  
34  
35  
36  
37  
38  
39  
40

41 Prior research in Saudi Arabia reported the prevalence of hypertension ranging from  
42 15.0%-26.1% <sup>10-12</sup>. The findings of the current study estimated the prevalence of  
43 hypertension as 14.49%, similar to previous studies. The findings that 40.77% of the  
44 population are considered hypertensive according to the 2017 ACC/AHA guidelines are  
45 alarming. The observation that 2 out of 5 Saudi adults could be diagnosed with  
46 hypertension heralds a sharp increase in the utilization of healthcare services, including  
47  
48  
49  
50  
51  
52  
53  
54  
55  
56  
57  
58  
59  
60

1  
2  
3 more clinic visits, increase in prescription, and potential implications for insurance, which  
4 will place a significant burden on the Saudi healthcare system.  
5  
6

7  
8 The risk factors for hypertension in the Saudi population have been investigated previously.  
9 However, in the current study, we compared these factors according to the two guidelines.  
10  
11 With both guidelines, the predictors of hypertension were male gender, increasing age,  
12  
13 diabetes mellitus, and obesity, particularly abdominal obesity, findings similar to prior  
14  
15 studies except for education, which was a predictor in some studies<sup>12</sup>. We reported four  
16  
17 differences in the predictors of hypertension between the two guidelines. Firstly, marital  
18  
19 status was a protective factor of hypertension development according to the JNC-7  
20  
21 guidelines only. Secondly, employment status was a risk factor per 2017 ACC/AHA alone  
22  
23 (except unemployment with the JNC-7 guidelines). Thirdly, weekly vigorous-exercise was  
24  
25 a protective factor based on the 2017 ACC/AHA. Fourthly, time standing at work was a  
26  
27 risk factor for hypertension, according to the JNC-7 guidelines. For the predictors of  
28  
29 prehypertension, diagnosis of diabetes, and abnormal waist circumference and waist-to-hip  
30  
31 ratio were significantly associated with prehypertension according to the JNC-7 guidelines.  
32  
33  
34  
35  
36  
37  
38

39 Based on our findings, we recommend the following three public health prevention  
40  
41 measures to be implemented at a population level. Firstly, for the average-risk  
42  
43 normotensive individuals, primary preventions should be applied to prevent or delay the  
44  
45 occurrence of hypertension. Examples include practicing a healthy lifestyle such as eating  
46  
47 a healthy diet, maintaining a healthy weight, avoiding smoking, and being physically active  
48  
49  
50  
51 <sup>8</sup>. These non-pharmacological interventions have been endorsed by the 2017 ACC/AHA  
52  
53 guidelines based on several observational and randomized controlled trials <sup>21</sup>. For instance,  
54  
55 in normotensive individuals, engaging in physical activities of 90-150 minutes/week is  
56  
57  
58  
59

1  
2  
3 associated with a reduction of 2-4 mmHg in systolic BP <sup>22</sup>. Although it is unfortunate that  
4 most of our population (70.70%), especially women (84.25%), reported never being  
5 engaged in any moderate exercise, governmental efforts through the Quality of Life  
6 program are ongoing to promote physical activities. Future studies should assess the impact  
7 of these programs on the incidence of hypertension.  
8  
9

10  
11  
12 Secondly, high-risk individuals who are non-hypertensive but at an increased risk of CVDs  
13 (e.g., overweight, smokers) and prehypertensive individuals, should be targeted for  
14 secondary prevention strategies. The goal is to achieve even lower BP levels compared to  
15 normotensive individuals. Primary Care Physicians (PCPs) are key players and have an  
16 essential role in detecting the disease and initiating non-pharmacologic treatment,  
17 including lifestyle modifications <sup>23</sup>.  
18  
19

20  
21  
22 Finally, for individuals with established hypertension, the goal of tertiary prevention is to  
23 control the hypertension and prevent the risk of CVDs. In addition to maintaining ideal  
24 body weight, consuming a healthy diet, and being physically active, the current Saudi  
25 guidelines, which are based on JNC-7, recommend pharmacological intervention in  
26 patients with stage 1 hypertension with a CVDs risk of  $\geq 10\%$  or stage 2 hypertension <sup>24</sup>. In  
27 our study, though 28% of hypertensive individuals were aware of their condition, only 58%  
28 had a prescription for antihypertensive medications and 60.50% were uncontrolled.  
29 However, it is unclear whether the uncontrolled hypertension is due to patient factors such  
30 as lack of medication adherence or the providers' inability to titrate antihypertensive  
31 treatment when the BP is suboptimal. For instance, half of the patients on a single  
32 antihypertensive agent were uncontrolled, compared to 12% uncontrolled in the group who  
33  
34  
35  
36  
37  
38  
39  
40  
41  
42  
43  
44  
45  
46  
47  
48  
49  
50  
51  
52  
53  
54  
55  
56  
57  
58  
59  
60

1  
2  
3 received  $\geq$  four antihypertensive medications. A multidisciplinary disease management  
4 strategy and follow-up of patients with uncontrolled BP should be emphasized.  
5  
6  
7

## 8 9 **STRENGTHS AND LIMITATION**

10  
11 Our study has several strengths. Firstly, we used a large sample of the Saudi population  
12 (n=10799) from diverse backgrounds (e.g., wives, professionals, students, and unemployed  
13 women). Secondly, we ascertained the hypertensive status using BP measurements, self-  
14 report, and antihypertensive use. Our study also has several limitations. Firstly, the study  
15 is limited to the capital of Saudi Arabia, Riyadh. However, given the characteristics of the  
16 participants, we believe that the geographic location is unlikely to affect the external  
17 validity of our findings. Secondly, we relied on the medical and pharmacy files to identify  
18 users of antihypertensive medications, and we may have missed some patients who were  
19 not identified with this approach. However, we only described the use of antihypertensive  
20 medications in the study and the effect estimate is not impacted. Thirdly, smoking was not  
21 a predictor of hypertension in this study, which could be because of reverse causation (i.e.,  
22 patients with hypertension have changed their behavior and quit smoking). In a sensitivity  
23 analysis, after excluding stage 2 hypertension patients (the severe cases who are more  
24 likely to quit), the multivariate regression in the JNC patients showed insignificant results;  
25 OR: 0.84 (0.71, 1.00), but the effect estimates remained unchanged in the ACC/AHA  
26 patients (OR: 0.79, 0.60, 0.91). Lastly, we do not have ambulatory BP data for the  
27 participants, which may overestimate some individuals who may have white coat  
28 hypertension; however, the prevalence of white coat hypertension is approximately 3% in  
29 a Saudi cohort, which is too small to affect the prevalence data.  
30  
31  
32  
33  
34  
35  
36  
37  
38  
39  
40  
41  
42  
43  
44  
45  
46  
47  
48  
49  
50  
51  
52  
53

## 54 55 **CONCLUSION**

1  
2  
3 The new hypertension guidelines resulted in an alarming increase in the prevalence of  
4 hypertension and prehypertension, with implications for an escalation in healthcare costs.  
5  
6 Unless strong public health measures are adopted, including the implementation of lifestyle  
7  
8 changes at a population level in conjunction with the aggressive management of  
9  
10 hypertension, we are likely to see an upward trend in the prevalence of hypertension and  
11  
12 associated cardiovascular morbidity and mortality.  
13  
14  
15

### 16 17 **ACKNOWLEDGEMENTS**

18  
19  
20 The authors would like to thank Dr. Mostafa Abolfotouh, Dr. Mohamed Hussein, Dr.  
21  
22 Barrak Alsomaie and Mr. Abdullah Alturki for their dedication and efforts in establishing  
23  
24 and supporting the Saudi Biobank. We would also like to thank all members of the Saudi  
25  
26 Biobank team.  
27  
28  
29

### 30 31 **FUNDING STATEMENT:**

32  
33 None.  
34  
35

### 36 37 **DATA ACCESS STATEMENT**

38  
39 Data not available due containing sensitive information that might expose the subject's  
40  
41 identity.  
42  
43

### 44 45 **AUTHOR STATEMENT**

46  
47 MA designed the study, conducted the analyses, and wrote the manuscript. RG collected  
48  
49 data, conducted analyses, and drafted manuscript. GA, ADA, AHA, and AM helped with  
50  
51 the study design and assisted with the manuscript preparation. All authors helped with  
52  
53  
54  
55  
56  
57  
58  
59  
60

1  
2  
3 manuscript revisions. GA helped with data acquisition. All authors have read and approved  
4  
5 the final manuscript.  
6  
7

## 8 **CONFLICT OF INTEREST** 9

10  
11 The authors declare that they have no competing interests.  
12  
13  
14  
15  
16  
17  
18  
19  
20  
21  
22  
23  
24  
25  
26  
27  
28  
29  
30  
31  
32  
33  
34  
35  
36  
37  
38  
39  
40  
41  
42  
43  
44  
45  
46  
47  
48  
49  
50  
51  
52  
53  
54  
55  
56  
57  
58  
59  
60

**REFERENCE:**

1. Zhou DP, Xi BP, Zhao MP, Wang LP, Veeranki SP. Uncontrolled hypertension increases risk of all-cause and cardiovascular disease mortality in US adults: the NHANES III Linked Mortality Study. Scientific Reports [Internet]. 2018;8(1). Available from: <https://www.ncbi.nlm.nih.gov/pmc/articles/PMC6010458/>.
2. A global brief on Hypertension [Internet]. World Health Organization; 2013 [cited 2020May17]. Available from: [https://ish-world.com/downloads/pdf/global\\_brief\\_hypertension.pdf](https://ish-world.com/downloads/pdf/global_brief_hypertension.pdf).
3. Kearney PM, Whelton M, Reynolds K, Muntner P, Whelton PK, He J. Global burden of hypertension: analysis of worldwide data. The Lancet [Internet]. 2005;365(9455):217–23. Available from: [https://www.thelancet.com/journals/lancet/article/PIIS0140-6736\(05\)17741-1/fulltext](https://www.thelancet.com/journals/lancet/article/PIIS0140-6736(05)17741-1/fulltext).
4. Islam JY, Zaman MM, Haq SA, Ahmed S, Quadir ZA-. Epidemiology of hypertension among Bangladeshi adults using the 2017 ACC/AHA Hypertension Clinical Practice Guidelines and Joint National Committee 7 Guidelines. Journal of Human Hypertension [Internet]. 2018;32(10):668–80. Available from: <https://www.ncbi.nlm.nih.gov/pmc/articles/PMC6207562/#CR1> .
5. Han M, Li Q, Liu L, Zhang D, Ren Y, Zhao Y, et al. Prehypertension and risk of cardiovascular diseases. Journal of Hypertension [Internet]. 2019;37(12):2325–32. Available from: <https://pubmed.ncbi.nlm.nih.gov/31335511/>.

- 1  
2  
3 6. Bolli P, Hemmelgarn B, Myers MG, McKay D, Tremblay G, Tobe SW. High  
4 normal blood pressure and prehypertension: The debate continues. Canadian Journal  
5 of Cardiology [Internet]. 2007;23(7):581–3. Available from:  
6  
7  
8 <https://www.ncbi.nlm.nih.gov/pmc/articles/PMC2650764/>.  
9  
10  
11  
12  
13 7. Whelton PK, Carey RM, Aronow WS, Casey DE, Collins KJ, Himmelfarb CD, et  
14 al. 2017 ACC/AHA/AAPA/ABC/ACPM/AGS/APhA/ASH/ASPC/NMA/PCNA  
15 Guideline for the Prevention, Detection, Evaluation, and Management of High Blood  
16 Pressure in Adults: Executive Summary: A Report of the American College of  
17 Cardiology/American Heart Association Task Force on Clinical Practice Guidelines.  
18 Hypertension [Internet]. 2018;71(6):1269–324. Available from:  
19  
20  
21  
22 <https://pubmed.ncbi.nlm.nih.gov/29133354/>.  
23  
24  
25  
26  
27  
28  
29  
30 8. National High Blood Pressure Education Program. The Seventh Report of the  
31 Joint National Committee on Prevention, Detection, Evaluation, and Treatment of  
32 High Blood Pressure [Internet]. National Center for Biotechnology Information. US  
33 National Library of Medicine; [cited 2020May14]. Available from:  
34  
35  
36  
37 <https://www.ncbi.nlm.nih.gov/books/NBK9630/>.  
38  
39  
40  
41  
42  
43 9. Reboussin DM, Allen NB, Griswold ME, Guallar E, Hong Y, Lackland DT, et al.  
44 Systematic Review for the 2017  
45 ACC/AHA/AAPA/ABC/ACPM/AGS/APhA/ASH/ASPC/NMA/PCNA Guideline for  
46 the Prevention, Detection, Evaluation, and Management of High Blood Pressure in  
47 Adults: A Report of the American College of Cardiology/American Heart Association  
48  
49  
50  
51  
52  
53  
54  
55  
56  
57  
58  
59  
60



1  
2  
3 Task Force on Clinical Practice Guidelines. Hypertension [Internet]. 2018;71(6).

4 Available from: <https://pubmed.ncbi.nlm.nih.gov/29133355/>.

5  
6  
7  
8  
9 10. El Bcheraoui, C., Memish, Z. A., Tuffaha, M., Daoud, F., Robinson, M., Jaber,  
10 S., ... & Al Rabeeah, A. A. (2014). Hypertension and its associated risk factors in the  
11 Kingdom of Saudi Arabia, 2013: a national survey. International journal of  
12

13 hypertension, 2014. Available from: <https://pubmed.ncbi.nlm.nih.gov/25170423/>

14  
15  
16  
17  
18  
19 11. Aldiab A, Shubair MM, Al-Zahrani JM, Aldossari KK, Al-Ghamdi S, Househ M,  
20 et al. Prevalence of hypertension and prehypertension and its associated  
21 cardioembolic risk factors; a population based cross-sectional study in Alkharj, Saudi  
22 Arabia. BMC Public Health [Internet]. 2018;18(1). Available from:  
23

24 <https://www.ncbi.nlm.nih.gov/pmc/articles/PMC6267095/>.

25  
26  
27  
28  
29  
30  
31 12. Saeed AA, Al-Hamdan NA, Bahnassy AA, Abdalla AM, Abbas MAF, Abuzaid  
32 LZ. Prevalence, Awareness, Treatment, and Control of Hypertension among Saudi  
33 Adult Population: A National Survey. International Journal of Hypertension  
34 [Internet]. 2011;2011:1–8. Available from:  
35

36 <https://pubmed.ncbi.nlm.nih.gov/21912737/>.

37  
38  
39  
40  
41  
42  
43 13. Kibria GMA, Swasey K, Kc A, Mirbolouk M, Sakib MN, Sharmeen A, et al.  
44 Estimated Change in Prevalence of Hypertension in Nepal Following Application of  
45 the 2017 ACC/AHA Guideline. JAMA Network Open [Internet]. 2018;1(3).

46 Available from: <https://pubmed.ncbi.nlm.nih.gov/30646022/>.

- 1  
2  
3 14. Lear SA, James PT, Ko GT, Kumanyika S. Appropriateness of waist  
4 circumference and waist-to-hip ratio cutoffs for different ethnic groups. European  
5 Journal of Clinical Nutrition [Internet]. 2009Dec;64(1):42–61. Available from:  
6 <https://www.nature.com/articles/ejcn200970> .  
7  
8  
9  
10  
11  
12  
13 15. Bullano MF, Kamat S, Willey VJ, Barlas S, Watson DJ, Brenneman SK.  
14 Agreement between administrative claims and the medical record in identifying  
15 patients with a diagnosis of hypertension. Agreement between administrative claims  
16 and the medical record in identifying patients with a diagnosis of hypertension  
17 [Internet]. 2006May [cited 2020May17];44(5):486–90. Available from:  
18 [https://journals.lww.com/lww-  
19 medicalcare/Abstract/2006/05000/Agreement\\_Between\\_Administrative\\_Claims\\_and  
20 the.14.aspx](https://journals.lww.com/lww-medicalcare/Abstract/2006/05000/Agreement_Between_Administrative_Claims_and_the.14.aspx).  
21  
22  
23  
24  
25  
26  
27  
28  
29  
30  
31  
32  
33 16. Smith C, Kosten S. Multiple Imputation: A Statistical Programming  
34 Story.PharmaSUG.[Internet]. 2017[cited 2020May17]. Available from:  
35 <https://www.pharmasug.org/proceedings/2017/SP/PharmaSUG-2017-SP01.pdf>.  
36  
37  
38  
39  
40  
41 17. Kleinbaum DG, Klein M. Logistic Regression a Self-Learning Text. New York,  
42 NY: Springer New York; 2010.  
43  
44  
45  
46 18. Hosmer DW, Lemeshow S, Sturdivant RX. Applied logistic regression. Hoboken,  
47 NJ: Wiley; 2013.  
48  
49  
50  
51  
52  
53  
54  
55  
56  
57  
58  
59  
60

- 1  
2  
3 19. von Elm E, Altman DG, Egger M, Pocock SJ, Gøtzsche PC, Vandenbroucke JP.  
4  
5 The Strengthening the Reporting of Observational Studies in Epidemiology  
6  
7 (STROBE) Statement: guidelines for reporting observational studies.  
8  
9  
10  
11 20. General Authority for statistics. Family Health Survey [Internet]. Household  
12  
13 Health Survey 2017. General Authority of Statistics Kingdom of Saudi Arabia; 2017  
14  
15 [cited 2020Apr30]. Available from:  
16  
17 [https://www.stats.gov.sa/sites/default/files/household\\_health\\_survey\\_2017\\_1.pdf](https://www.stats.gov.sa/sites/default/files/household_health_survey_2017_1.pdf).  
18  
19  
20  
21 21. Arnett DK, Blumenthal RS, Albert MA, Buroker AB, Goldberger ZD, Hahn EJ,  
22  
23 et al. 2019 ACC/AHA Guideline on the Primary Prevention of Cardiovascular  
24  
25 Disease: A Report of the American College of Cardiology/American Heart  
26  
27 Association Task Force on Clinical Practice Guidelines. *Circulation* [Internet].  
28  
29 2019Oct;140(11). Available from: <https://pubmed.ncbi.nlm.nih.gov/30879355/>.  
30  
31  
32  
33 22. Stefani L, Mascherini G, Tosi B, Galanti G. Hypertension Today: Role of Sports  
34  
35 and Exercise Medicine. *Journal Of Hypertension And Cardiology* [Internet].  
36  
37 2019;2(4):20–7. Available from: <https://openaccesspub.org/jhc/article/1078>.  
38  
39  
40  
41 23. Weltermann B, Kersting C, Viehmann A. Hypertension Management in Primary  
42  
43 Care: A Cluster Randomized Trial of a Physician-focused Educational Intervention.  
44  
45 *Deutsches Aerzteblatt Online* [Internet]. 2016Nov; Available from:  
46  
47 <https://pubmed.ncbi.nlm.nih.gov/27010951/>.  
48  
49  
50  
51 24. Saudi Hypertension Management Society. Saudi Hypertension Guidelines. 2018.  
52  
53  
54  
55  
56  
57  
58  
59  
60

1  
2  
3  
4  
5  
6  
7  
8  
9  
10  
11  
12  
13  
14  
15  
16  
17  
18  
19  
20  
21  
22  
23  
24  
25  
26  
27  
28  
29  
30  
31  
32  
33  
34  
35  
36  
37  
38  
39  
40  
41  
42  
43  
44  
45  
46  
47  
48  
49  
50  
51  
52  
53  
54  
55  
56  
57  
58  
59  
60

For peer review only

**Table 1. Sociodemographic characteristics of the Saudi National Biobank, 2017-2020**

| Characteristics               | Total (n=10799) |       | Men (n=5497) |       | Women (n=5302) |       |
|-------------------------------|-----------------|-------|--------------|-------|----------------|-------|
|                               | n               | %     | n            | %     | n              | %     |
| <b>Age mean (SD)</b>          | 30.05           | 8.85  | 29.78        | 8.52  | 30.34          | 9.18  |
| 18-29                         | 6110            | 56.58 | 3189         | 58.01 | 2921           | 55.09 |
| 30-39                         | 3140            | 29.08 | 1612         | 29.33 | 1528           | 28.82 |
| 40-49                         | 1146            | 10.61 | 517          | 9.41  | 629            | 11.86 |
| 50-59                         | 326             | 3.02  | 138          | 2.51  | 188            | 3.55  |
| ≥60                           | 77              | 0.71  | 41           | 0.75  | 36             | 0.68  |
| <b>Marital status</b>         |                 |       |              |       |                |       |
| Never married                 | 5874            | 54.39 | 3118         | 56.72 | 2756           | 51.98 |
| Married                       | 4587            | 42.48 | 2293         | 41.71 | 2294           | 43.27 |
| Divorced                      | 270             | 2.50  | 49           | 0.89  | 221            | 4.17  |
| Missing                       | 68              | 0.63  | 37           | 0.67  | 31             | 0.58  |
| <b>Employment</b>             |                 |       |              |       |                |       |
| Employed                      | 5453            | 50.50 | 3852         | 70.07 | 1601           | 30.20 |
| Unemployed                    | 960             | 8.89  | 184          | 3.35  | 776            | 14.64 |
| Student                       | 2950            | 27.32 | 1201         | 21.85 | 1749           | 32.99 |
| Retired/others                | 1307            | 12.10 | 155          | 2.82  | 1152           | 21.73 |
| Missing                       | 129             | 1.19  | 105          | 1.91  | 24             | 0.45  |
| <b>Family income</b>          |                 |       |              |       |                |       |
| ≤5000                         | 3487            | 32.29 | 1231         | 22.39 | 2256           | 42.55 |
| 5001 - 10,000                 | 2371            | 21.96 | 1849         | 33.64 | 522            | 9.85  |
| 1,0001 - 15,000               | 1006            | 9.32  | 675          | 12.28 | 331            | 6.24  |
| 15,001 – 20,000               | 413             | 3.82  | 276          | 5.02  | 137            | 2.58  |
| >20,000                       | 221             | 2.05  | 176          | 3.20  | 45             | 0.85  |
| Missing                       | 3301            | 30.57 | 1290         | 23.47 | 2011           | 37.93 |
| <b>Education level</b>        |                 |       |              |       |                |       |
| < Primary school              | 119             | 1.10  | 23           | 0.42  | 96             | 1.81  |
| Primary school                | 235             | 2.18  | 55           | 1.00  | 180            | 3.39  |
| Intermediate school           | 372             | 3.44  | 154          | 2.80  | 218            | 4.11  |
| High school                   | 4557            | 42.20 | 2752         | 50.06 | 1805           | 34.04 |
| Some college                  | 759             | 7.03  | 591          | 10.75 | 168            | 3.17  |
| Bachelor’s degree             | 4346            | 40.24 | 1738         | 31.62 | 2608           | 49.19 |
| Higher education              | 345             | 3.19  | 137          | 2.49  | 208            | 3.92  |
| Missing                       | 66              | 0.61  | 47           | 0.86  | 19             | 0.36  |
| <b>BMI (kg/m<sup>2</sup>)</b> |                 |       |              |       |                |       |
| Underweight                   | 683             | 6.32  | 343          | 6.24  | 340            | 6.41  |

|                                 |        |         |        |         |        |         |
|---------------------------------|--------|---------|--------|---------|--------|---------|
| Normal weight                   | 4206   | 38.99   | 2108   | 38.35   | 2098   | 39.57   |
| Overweight                      | 3235   | 29.99   | 1741   | 31.67   | 1494   | 28.18   |
| Obese                           | 2386   | 22.12   | 1165   | 21.19   | 1221   | 23.03   |
| Extremely obese                 | 277    | 2.57    | 132    | 2.40    | 145    | 2.73    |
| Missing                         | 12     | 0.11    | 4      | 0.08    | 8      | 0.15    |
| <b>Waist circum., mean (SD)</b> | 82.39  | (16.09) | 88.52  | (15.12) | 76.01  | (14.51) |
| Missing                         | 105    | 0.97    | 43     | 0.78    | 62     | 1.17    |
| <b>Waist to hip ratio</b>       | 0.81   | (0.10)  | 0.87   | (0.08)  | 0.75   | (0.09)  |
| Missing                         | 112    | 1.04    | 45     | 0.82    | 67     | 1.26    |
| <b>Diabetes History</b>         |        |         |        |         |        |         |
| No                              | 10140  | 93.90   | 5161   | 93.89   | 4979   | 93.91   |
| Yes                             | 659    | 6.10    | 336    | 6.11    | 323    | 6.09    |
| <b>Blood pressure</b>           |        |         |        |         |        |         |
| Systolic blood pressure         | 120.73 | 15.01   | 123.97 | 15.24   | 117.37 | 14.01   |
| Diastolic blood pressure        | 75.24  | 10.70   | 76.46  | 10.70   | 73.97  | 10.56   |

**Table 2. Selected lifestyle characteristics of the Saudi National Biobank, 2017-2020**

| Characteristics                 | Total (n=10799) |       | Men (n=5497) |       | Women (n=5302) |       |
|---------------------------------|-----------------|-------|--------------|-------|----------------|-------|
|                                 | n               | %     | n            | %     | n              | %     |
| <b>Tobacco use</b>              |                 |       |              |       |                |       |
| No                              | 8811            | 81.59 | 3625         | 65.95 | 5186           | 97.81 |
| Yes                             | 1756            | 16.26 | 1690         | 30.74 | 66             | 1.24  |
| Missing                         | 232             | 2.15  | 182          | 3.31  | 50             | 0.94  |
| <b>Vigorous exercise (week)</b> |                 |       |              |       |                |       |
| Never                           | 7635            | 70.70 | 3168         | 57.63 | 4467           | 84.25 |
| Once                            | 744             | 6.89  | 571          | 10.39 | 173            | 3.26  |
| 2-3                             | 944             | 8.74  | 615          | 11.19 | 329            | 6.21  |
| 4-5                             | 740             | 6.85  | 556          | 10.11 | 184            | 3.47  |
| >5                              | 541             | 5.01  | 423          | 7.70  | 118            | 2.23  |
| Missing                         | 195             | 1.81  | 164          | 2.98  | 31             | 0.58  |
| <b>Time spent sitting</b>       |                 |       |              |       |                |       |
| Never                           | 113             | 1.05  | 102          | 1.86  | 11             | 0.21  |
| A few times                     | 2259            | 20.92 | 1279         | 23.27 | 980            | 18.48 |
| Sometimes                       | 3058            | 28.32 | 1421         | 25.85 | 1637           | 30.88 |

|    |                              |      |       |      |       |      |       |
|----|------------------------------|------|-------|------|-------|------|-------|
| 1  |                              |      |       |      |       |      |       |
| 2  |                              |      |       |      |       |      |       |
| 3  | Most of the times            | 4841 | 44.83 | 2269 | 41.28 | 2572 | 48.51 |
| 4  | All the times                | 304  | 2.82  | 242  | 4.40  | 62   | 1.17  |
| 5  | Missing                      | 224  | 2.07  | 184  | 3.35  | 40   | 0.75  |
| 6  |                              |      |       |      |       |      |       |
| 7  | <b>Time spent standing</b>   |      |       |      |       |      |       |
| 8  | Never                        | 198  | 1.83  | 138  | 2.51  | 60   | 1.13  |
| 9  | A few times                  | 4098 | 37.95 | 1998 | 36.35 | 2100 | 39.61 |
| 10 | Sometimes                    | 4261 | 39.46 | 1997 | 36.33 | 2264 | 42.70 |
| 11 | Most of the times            | 1864 | 17.26 | 1045 | 19.01 | 819  | 15.45 |
| 12 | All the times                | 131  | 1.21  | 114  | 2.07  | 17   | 0.32  |
| 13 | Missing                      | 247  | 2.29  | 205  | 3.73  | 42   | 0.79  |
| 14 |                              |      |       |      |       |      |       |
| 15 | <b>Time spent walking</b>    |      |       |      |       |      |       |
| 16 | Never                        | 204  | 1.89  | 150  | 2.73  | 54   | 1.02  |
| 17 | A few times                  | 3423 | 31.70 | 1741 | 31.67 | 1682 | 31.72 |
| 18 | Sometimes                    | 3847 | 35.62 | 1752 | 31.87 | 2095 | 39.51 |
| 19 | Most of the times            | 2730 | 25.28 | 1332 | 24.23 | 1398 | 26.37 |
| 20 | All the times                | 359  | 3.32  | 326  | 5.93  | 33   | 0.62  |
| 21 | Missing                      | 236  | 2.19  | 196  | 3.57  | 40   | 0.75  |
| 22 |                              |      |       |      |       |      |       |
| 23 | <b>Cup of tea per day</b>    |      |       |      |       |      |       |
| 24 | None                         | 4233 | 39.20 | 1376 | 25.03 | 2857 | 53.89 |
| 25 | 1-2                          | 4188 | 38.78 | 2282 | 41.51 | 1906 | 35.95 |
| 26 | 3-4                          | 1309 | 12.12 | 954  | 17.35 | 355  | 6.70  |
| 27 | 5-6                          | 432  | 4.00  | 332  | 6.04  | 100  | 1.89  |
| 28 | 7-9                          | 147  | 1.36  | 130  | 2.36  | 17   | 0.32  |
| 29 | ≥10                          | 303  | 2.81  | 275  | 5.00  | 28   | 0.53  |
| 30 | Missing                      | 187  | 1.73  | 148  | 2.69  | 39   | 0.74  |
| 31 |                              |      |       |      |       |      |       |
| 32 | <b>Black coffee per day</b>  |      |       |      |       |      |       |
| 33 | None                         | 6524 | 60.41 | 3040 | 55.30 | 3484 | 65.71 |
| 34 | 1-2                          | 3152 | 29.19 | 1711 | 31.13 | 1441 | 27.18 |
| 35 | 3-4                          | 721  | 6.68  | 430  | 7.82  | 291  | 5.49  |
| 36 | ≥5                           | 181  | 1.68  | 126  | 2.29  | 55   | 1.04  |
| 37 | Missing                      | 221  | 2.05  | 190  | 3.46  | 31   | 0.58  |
| 38 |                              |      |       |      |       |      |       |
| 39 | <b>Arabic coffee per day</b> |      |       |      |       |      |       |
| 40 | None                         | 3232 | 29.93 | 1476 | 26.85 | 1756 | 33.12 |
| 41 | 1-2                          | 2174 | 20.13 | 1256 | 22.85 | 918  | 17.31 |
| 42 |                              |      |       |      |       |      |       |
| 43 |                              |      |       |      |       |      |       |
| 44 |                              |      |       |      |       |      |       |
| 45 |                              |      |       |      |       |      |       |
| 46 |                              |      |       |      |       |      |       |
| 47 |                              |      |       |      |       |      |       |

|                          |      |       |      |       |      |       |
|--------------------------|------|-------|------|-------|------|-------|
| 3-4                      | 1912 | 17.71 | 1049 | 19.08 | 863  | 16.28 |
| 5-6                      | 1232 | 11.41 | 619  | 11.26 | 613  | 11.56 |
| 7-9                      | 556  | 5.15  | 267  | 4.86  | 289  | 5.45  |
| ≥10                      | 1462 | 13.54 | 665  | 12.10 | 797  | 15.03 |
| Missing                  | 231  | 2.14  | 165  | 3.00  | 66   | 1.24  |
| <b>Soda per day</b>      |      |       |      |       |      |       |
| None                     | 6300 | 58.34 | 2396 | 43.59 | 3904 | 73.63 |
| 1-2                      | 3365 | 31.16 | 2172 | 39.51 | 1193 | 22.50 |
| 3-4                      | 708  | 6.56  | 570  | 10.37 | 138  | 2.60  |
| ≥5                       | 201  | 1.86  | 180  | 3.27  | 21   | 0.40  |
| Missing                  | 225  | 2.08  | 179  | 3.26  | 46   | 0.87  |
| <b>Fruit per day</b>     |      |       |      |       |      |       |
| 0-1                      | 8203 | 75.96 | 3803 | 69.18 | 4400 | 82.99 |
| 2                        | 1550 | 14.35 | 952  | 17.32 | 598  | 11.28 |
| 3                        | 362  | 3.35  | 189  | 3.44  | 173  | 3.26  |
| ≥4                       | 156  | 1.44  | 99   | 1.80  | 57   | 1.08  |
| Missing                  | 528  | 4.89  | 454  | 8.26  | 74   | 1.40  |
| <b>Vegetable per day</b> |      |       |      |       |      |       |
| 0-1                      | 7685 | 71.16 | 3633 | 66.09 | 4052 | 76.42 |
| 2                        | 1890 | 17.50 | 1032 | 18.77 | 858  | 16.18 |
| 3                        | 562  | 5.20  | 297  | 5.40  | 265  | 5.00  |
| ≥4                       | 156  | 1.44  | 96   | 1.75  | 60   | 1.13  |
| Missing                  | 506  | 4.69  | 439  | 7.99  | 67   | 1.26  |



Table 3. Measures of blood pressure based on different guidelines, Saudi Biobank 2017-2020

|                           |        | JNC-7        |           |           |           | ACC/AHA      |            |           |           |
|---------------------------|--------|--------------|-----------|-----------|-----------|--------------|------------|-----------|-----------|
|                           |        | Hypertension |           |           |           | Hypertension |            |           |           |
| Measures                  |        | Normal       | Pre-HTN   | Stage 1   | Stage 2   | Normal       | Elevated   | Stage 1   | Stage 2   |
| <b>Definition (mm Hg)</b> |        | <120         | 120-139   | 140-159   | ≥160      | <120         | 120-129    | 130-139   | ≥140      |
|                           |        | <i>And</i>   | <i>Or</i> | <i>Or</i> | <i>Or</i> | <i>And</i>   | <i>And</i> | <i>Or</i> | <i>Or</i> |
|                           |        | <80          | 80-89     | 90-99     | ≥100      | <80          | <80        | 80-89     | ≥90       |
| <b>SBP</b>                | Mean   | 108.50       | 125.57    | 140.06    | 157.32    | 108.50       | 124.0      | 126.51    | 143.33    |
|                           | SD     | 7.70         | 7.49      | 10.55     | 16.58     | 7.70         | 2.81       | 9.10      | 13.71     |
|                           | Median | 110.0        | 126.0     | 142.0     | 160.0     | 110.0        | 124.0      | 129.0     | 143.0     |
|                           | IQR    | 11.0         | 10.0      | 12.0      | 21.0      | 11.0         | 4.0        | 12.0      | 14.0      |
|                           | Min    | 70           | 71        | 65        | 109       | 70           | 120        | 71        | 65        |
|                           | Max    | 119          | 139       | 159       | 211       | 119          | 129        | 139       | 211       |
| <b>DBP</b>                | Mean   | 68.02        | 77.43     | 87.94     | 101.42    | 68.02        | 71.50      | 80.99     | 90.50     |
|                           | SD     | 6.67         | 7.40      | 7.71      | 10.0      | 6.67         | 5.70       | 5.86      | 9.75      |
|                           | Median | 69.0         | 79.0      | 90.0      | 102.0     | 69.0         | 73.0       | 82.0      | 91.0      |
|                           | IQR    | 10.0         | 10.0      | 9.0       | 8.0       | 10.0         | 8.0        | 5.0       | 11.0      |
|                           | Min    | 37           | 42        | 58        | 71        | 37           | 42         | 44        | 58        |
|                           | Max    | 79           | 89        | 99        | 134       | 79           | 79         | 89        | 134       |

**Table 4. Determinants of hypertension according to guidelines among Saudi National Biobank, 2017-2020 (n = 10799)**

| Characteristics          | JNC-7               |                  |                   | ACC/AHA             |                  |                  |
|--------------------------|---------------------|------------------|-------------------|---------------------|------------------|------------------|
|                          | HTN (%)             | OR (95% CI)      | AOR (95% CI)      | HTN (%)             | OR (95% CI)      | AOR (95% CI)     |
| Overall                  | 14.49 (14.37,14.61) | -                | -                 | 40.77 (40.60,40.94) | -                | -                |
| <b>Gender</b>            |                     |                  |                   |                     |                  |                  |
| Women                    | 10.39 (10.24,10.54) | 1.0              | 1.0               | 33.57 (33.34,33.80) | 1.0              | 1.0              |
| Men                      | 18.45 (18.26,18.63) | 1.95 (1.74,2.18) | 3.10 (2.66,3.60)  | 47.72 (47.48,47.96) | 1.80 (1.67,1.95) | 2.79 (2.51,3.11) |
| <b>Age (years)</b>       |                     |                  |                   |                     |                  |                  |
| 18-29                    | 10.67 (10.53,10.81) | 1.0              | 1.0               | 34.86 (34.64,35.08) | 1.0              | 1.0              |
| 30-39                    | 14.62 (14.40,14.85) | 1.42 (1.25,1.62) | 1.39 (1.16,1.67)  | 43.44 (43.12,43.76) | 1.43 (1.31,1.57) | 1.27 (1.13,1.44) |
| 40-49                    | 27.33 (26.87,27.80) | 3.14 (2.69,3.66) | 2.55 (2.03,3.19)  | 55.58 (55.06,56.11) | 2.34 (2.06,2.66) | 1.70 (1.44,2.02) |
| 50-59                    | 36.31 (35.39,37.22) | 4.82 (3.79,6.13) | 3.23 (2.34,4.44)  | 66.87 (65.94,67.80) | 3.77 (2.98,3.78) | 2.28 (1.72,3.03) |
| ≥60                      | 34.15 (32.27,36.02) | 4.53 (2.81,7.28) | 2.21 (1.26,3.87)  | 70.13 (68.23,71.96) | 4.39 (2.68,7.17) | 2.09 (1.20,3.63) |
| <b>Marital status</b>    |                     |                  |                   |                     |                  |                  |
| Never married            | 11.91 (11.76,12.06) | 1.0              | 1.0               | 36.18 (35.95,36.40) | 1.0              | 1.0              |
| Married                  | 17.76 (17.59,17.99) | 1.60 (1.43,1.78) | 0.73 (0.61,0.87)  | 46.39 (46.13,46.65) | 1.53 (1.41,1.65) | 0.91 (0.81,1.02) |
| Divorced, separated      | 17.30 (16.50,18.10) | 1.64 (1.19,2.26) | 0.95 (0.66,1.38)  | 44.18 (44.10,46.25) | 1.45 (1.14,1.85) | 1.07 (0.81,1.41) |
| <b>Education</b>         |                     |                  |                   |                     |                  |                  |
| < Primary school         | 28.44 (26.97,29.92) | 1.0              | 1.0               | 58.75 (57.13,60.35) | 1.0              | 1.0              |
| Primary school           | 30.07 (29.01,31.14) | 1.08 (0.66,1.75) | 1.18 (0.70,1.98)  | 59.72 (58.58,60.86) | 1.04 (0.66,1.63) | 1.11 (0.69,1.79) |
| Intermediate school      | 22.52 (21.75,23.29) | 0.73 (0.46,1.16) | 0.84 (0.51,1.39)  | 50.43 (49.50,51.35) | 0.71 (0.47,1.08) | 0.82 (0.52,1.28) |
| High school              | 13.45 (13.27,13.63) | 0.39 (0.26,0.59) | 0.78 (0.49,1.23)  | 38.04 (37.79,38.30) | 0.43 (0.30,0.62) | 0.75 (0.49,1.12) |
| Some college             | 18.68 (18.18,19.19) | 0.58 (0.37,0.89) | 1.00 (0.61,1.65)  | 48.19 (47.54,48.84) | 0.65 (0.44,0.97) | 1.01 (0.65,1.56) |
| Bachelor's degree        | 12.90 (12.71,13.08) | 0.37 (0.25,0.56) | 0.78 (0.49,1.25)  | 40.05 (39.78,40.31) | 0.47 (0.32,0.68) | 0.86 (0.57,1.31) |
| Higher education         | 15.02 (14.33,15.72) | 0.44 (0.27,0.73) | 0.79 (0.45,1.41)  | 40.08 (39.14,41.02) | 0.47 (0.31,0.72) | 0.80 (0.49,1.29) |
| <b>Employment status</b> |                     |                  |                   |                     |                  |                  |
| Employed                 | 15.02 (14.84,15.19) | 1.0              | 1.0               | 41.70 (41.46,41.94) | 1.0              | 1.0              |
| Unemployed               | 13.54 (13.14,13.93) | 0.89 (0.72,1.08) | 1.35 (1.03,1.78)  | 38.36 (37.80,38.92) | 0.87 (0.75,1.00) | 1.27 (1.04,1.55) |
| Student                  | 11.72 (11.50,11.93) | 0.75 (0.65,0.86) | 1.60 (0.90, 1.50) | 37.33 (37.01,37.65) | 0.83 (0.76,0.91) | 1.36 (1.14,1.63) |
| Retired/others           | 19.26 (18.87,19.65) | 1.35 (1.15,1.58) | 1.24 (0.96,1.59)  | 46.44 (45.94,46.93) | 1.21 (1.07,1.37) | 1.21 (1.00,1.45) |
| <b>Income</b>            |                     |                  |                   |                     |                  |                  |
| ≤5000                    | 13.43 (13.26,13.59) | 1.0              | 1.0               | 38.86 (38.62,39.10) | 1.0              | 1.0              |
| 5001 - 10,000            | 12.87 (12.66,13.08) | 0.95 (0.83,1.09) | 0.76 (0.60,0.97)  | 38.46 (38.15,38.76) | 0.98 (0.89,1.08) | 0.86 (0.72,1.03) |
| 1,0001 - 15,000          | 18.40 (18.02,18.97) | 1.45 (1.22,1.72) | 0.94 (0.71,1.25)  | 47.95 (47.45,48.44) | 1.45 (1.27,1.65) | 1.03 (0.83,1.27) |
| 15,001 – 20,000          | 20.68 (20.06,21.30) | 1.68 (1.31,2.15) | 0.98 (0.69,1.39)  | 50.89 (50.12,51.66) | 1.63 (1.34,1.99) | 1.08 (0.82,1.43) |
| >20,000                  | 22.77 (21.90,23.64) | 1.90 (1.40,2.58) | 0.89 (0.58,1.37)  | 50.26 (49.22,51.30) | 1.59 (1.22,2.06) | 0.85 (0.61,1.20) |
| <b>Vigorous exercise</b> |                     |                  |                   |                     |                  |                  |
| Never                    | 15.79 (15.64,15.94) | 1.0              | 1.0               | 42.84 (42.63,43.04) | 1.0              | 1.0              |
| 1                        | 13.67 (13.23,14.12) | 0.84 (0.68,1.05) | 1.17 (0.93,1.48)  | 38.95 (38.31,39.58) | 0.85 (0.73,0.99) | 0.79 (0.67,0.94) |
| 2-3                      | 11.15 (10.79,11.52) | 0.67 (0.54,0.83) | 0.87 (0.64,1.18)  | 35.29 (34.74,35.84) | 0.73 (0.63,0.84) | 0.75 (0.65,0.88) |
| 4-5                      | 10.01 (9.62,10.40)  | 0.59 (0.46,0.76) | 0.75 (0.54,1.04)  | 33.65 (33.04,34.26) | 0.68 (0.58,0.79) | 0.68 (0.57,0.81) |
| >5                       | 9.64 (9.19,10.08)   | 0.57 (0.43,0.76) | 0.76 (0.53,1.10)  | 34.00 (33.29,34.72) | 0.69 (0.57,0.82) | 0.72 (0.59,0.87) |

|    |                               |                     |                    |                  |                     |                   |                  |
|----|-------------------------------|---------------------|--------------------|------------------|---------------------|-------------------|------------------|
| 1  |                               |                     |                    |                  |                     |                   |                  |
| 2  |                               |                     |                    |                  |                     |                   |                  |
| 3  | <b>Time standing at work</b>  |                     |                    |                  |                     |                   |                  |
| 4  | Never                         | 7.07 (6.43,7.72)    | 1.0                | 1.0              | 38.80 (37.57,40.02) | 1.0               | 1.0              |
| 5  | A few times                   | 15.02 (14.82,15.22) | 2.32 (1.34,4.02)   | 2.60 (1.47,4.62) | 40.90 (40.62,41.17) | 1.09 (0.81,1.46)  | 1.09 (0.80,1.50) |
| 6  | Sometimes                     | 14.76 (14.56,14.95) | 2.27 (1.31,3.94)   | 2.60 (1.47,4.62) | 42.30 (42.04,42.57) | 1.16 (0.86,1.55)  | 1.18 (0.86,1.62) |
| 8  | Most of the times             | 13.80 (13.51,14.08) | 2.10 (1.20,3.67)   | 2.66 (1.48,4.76) | 37.60 (37.20,38.00) | 0.95 (0.70,1.28)  | 1.03 (0.74,1.42) |
| 9  | All the times                 | 10.60 (9.65,11.55)  | 1.56 (0.71,3.39)   | 1.92 (0.85,4.34) | 35.54 (34.07,37.02) | 0.87 (0.55,1.37)  | 0.95 (0.58,1.55) |
| 11 | <b>Current smoker</b>         |                     |                    |                  |                     |                   |                  |
| 12 | No                            | 14.47 (14.34,14.60) | 1.0                | 1.0              | 40.93 (40.75,41.12) | 1.0               | 1.0              |
| 13 | Yes                           | 14.60 (14.30,14.89) | 1.01 (0.87,1.17)   | 0.79 (0.67,0.93) | 39.98 (39.57,40.39) | 0.96 (0.87,1.07)  | 0.75 (0.66,0.85) |
| 14 | <b>Diabetes</b>               |                     |                    |                  |                     |                   |                  |
| 15 | No                            | 13.44 (13.32,13.56) | 1.0                | 1.0              | 39.37 (39.20,39.54) | 1.0               | 1.0              |
| 16 | Yes                           | 30.65 (30.01,31.30) | 2.48 (2.39,3.39)   | 1.64 (1.34,2.00) | 62.37 (61.69,63.04) | 2.55 (2.17,3.00)  | 1.67 (1.40,1.99) |
| 17 | <b>BMI (kg/m<sup>2</sup>)</b> |                     |                    |                  |                     |                   |                  |
| 18 | Underweight                   | 5.41 (5.10,5.72)    | 1.0                | 1.0              | 20.84 (20.28,21.39) | 1.0               | 1.0              |
| 19 | Normal weight                 | 8.89 (8.73,9.04)    | 1.70 (1.20,2.41)   | 1.67 (1.17,2.38) | 30.76 (30.51,31.02) | 1.69 (1.39,2.05)  | 1.67 (1.37,2.04) |
| 20 | Overweight                    | 14.69 (14.47,14.92) | 3.01 (2.13,4.24)   | 2.15 (1.50,3.08) | 44.37 (44.06,44.68) | 3.03 (2.49,3.69)  | 2.43 (1.97,3.00) |
| 21 | Obese                         | 23.98 (23.67,24.29) | 5.51 (3.90,7.77)   | 2.97 (2.04,4.34) | 56.12 (55.76,56.48) | 4.86 (3.97,5.94)  | 3.17 (2.52,3.99) |
| 22 | Extremely Obese               | 37.82 (36.78,38.87) | 10.62 (7.04,16.01) | 5.24 (3.35,8.19) | 67.53 (66.53,68.54) | 7.90 (5.78,10.79) | 4.64 (3.31,6.52) |
| 23 | <b>Waist Circum.</b>          |                     |                    |                  |                     |                   |                  |
| 24 | Normal                        | 9.30 (9.17,9.42)    | 1.0                | 1.0              | 32.65 (32.44,32.85) | 1.0               | 1.0              |
| 25 | Not Normal                    | 23.94 (23.69,24.18) | 3.07 (2.75,3.43)   | 1.53 (1.29,1.81) | 55.54 (55.25,55.83) | 2.58 (2.38,2.79)  | 1.32 (1.17,1.50) |
| 26 | <b>Waist to hip ratio</b>     |                     |                    |                  |                     |                   |                  |
| 27 | Normal                        | 12.38 (12.26,12.51) | 1.0                | 1.0              | 37.55 (37.37,37.74) | 1.0               | 1.0              |
| 27 | Not Normal                    | 23.53 (23.19,23.86) | 2.18 (1.93,2.45)   | 1.19 (1.02,1.38) | 54.57 (54.18,54.97) | 1.99 (1.81,2.20)  | 1.27 (1.13,1.43) |

Waist Circumference: (men<94, women <80), Waist to hip ratio: (men<0.95, women <0.80), AOR: Adjusted OR.

**Table 5. Determinants of prehypertension/elevated BP according to guidelines among Saudi National Biobank, 2017-2020 (n = 10799)**

| Characteristics             | JNC-7               |                  |                  | ACC/AHA             |                  |                  |
|-----------------------------|---------------------|------------------|------------------|---------------------|------------------|------------------|
|                             | Pre-HTN (%)         | OR (95% CI)      | AOR (95% CI)     | Elevated BP (%)     | OR (95% CI)      | AOR (95% CI)     |
| Overall                     | 49.23 (49.04,49.42) | -                | -                | 15.78 (15.66,15.91) | -                | -                |
| <b>Gender</b>               |                     |                  |                  |                     |                  |                  |
| Women                       | 41.57 (41.31,41.83) | 1.0              | 1.0              | 21.18 (20.93,21.43) | 1.0              | 1.0              |
| Men                         | 57.35 (57.09,57.61) | 1.89 (1.74,2.05) | 3.00 (2.67,3.37) | 33.47 (331.6,33.79) | 1.87 (1.67,2.09) | 2.86 (2.45,3.33) |
| <b>Age (years)</b>          |                     |                  |                  |                     |                  |                  |
| 18-29                       | 46.84 (46.60,47.08) | 1.0              | 1.0              | 27.09 (26.83,27.34) | 1.0              | 1.0              |
| 30-39                       | 50.15 (49.80,50.49) | 1.14 (1.04,1.25) | 0.95 (0.85,1.07) | 24.66 (24.30,25.03) | 0.88 (0.77,1.00) | 0.76 (0.64,0.89) |
| 40-49                       | 56.59 (55.98,57.21) | 1.48 (1.28,1.71) | 1.05 (0.88,1.26) | 28.88 (28.16,29.60) | 1.09 (0.89,1.34) | 0.80 (0.62,1.02) |
| 50-59                       | 65.70 (64.52,66.88) | 2.17 (1.62,2.91) | 1.33 (0.96,1.86) | 34.26 (32.63,35.89) | 1.40 (0.94,2.10) | 0.93 (0.59,1.47) |
| ≥60                         | 70.00 (67.63,72.27) | 2.64 (1.44,4.86) | 1.42 (0.73,2.77) | 34.78 (31.23,38.34) | 1.43 (0.61,3.40) | 0.79 (0.31,2.01) |
| <b>Education</b>            |                     |                  |                  |                     |                  |                  |
| < Primary school            | 59.94 (58.04,61.83) | 1.0              | 1.0              | 30.50 (28.16,32.84) | 1.0              | 1.0              |
| Primary school              | 59.45 (58.09,60.82) | 0.98 (0.57,1.67) | 0.96 (0.55,1.68) | 29.61 (27.93,31.28) | 0.96 (0.45,2.03) | 0.89 (0.41,1.92) |
| Intermediate school         | 53.35 (52.30,54.39) | 0.76 (0.47,1.25) | 0.74 (0.44,1.25) | 27.08 (25.92,28.25) | 0.85 (0.42,1.69) | 0.74 (0.36,1.50) |
| High school                 | 47.51 (47.23,47.80) | 0.60 (0.39,0.94) | 0.68 (0.43,1.10) | 26.68 (26.39,26.98) | 0.83 (0.45,1.53) | 0.70 (0.37,1.34) |
| Some college                | 54.90 (54.18,55.61) | 0.81 (0.51,1.29) | 0.84 (0.51,1.38) | 29.21 (28.39,30.03) | 0.94 (0.49,1.79) | 0.77 (0.39,1.51) |
| Bachelor's degree           | 49.23 (48.94,49.52) | 0.65 (0.42,1.00) | 0.79 (0.49,1.27) | 26.24 (25.93,26.55) | 0.81 (0.44,1.50) | 0.74 (0.39,1.41) |
| Higher education            | 47.49 (46.45,48.53) | 0.60 (0.37,0.99) | 0.74 (0.43,1.27) | 25.53 (24.45,26.61) | 0.78 (0.39,1.54) | 0.74 (0.36,1.54) |
| <b>Employment status</b>    |                     |                  |                  |                     |                  |                  |
| Employed                    | 49.66 (49.40,49.94) | 1.0              | 1.0              | 26.62 (26.34,26.90) | 1.0              | 1.0              |
| Unemployed                  | 47.27 (46.66,47.89) | 0.91 (0.78,1.05) | 1.38 (1.12,1.69) | 26.04 (25.40,26.69) | 0.97 (0.79,1.18) | 1.50 (1.13,1.99) |
| Student                     | 48.97 (48.62,49.32) | 0.97 (0.88,1.07) | 1.58 (1.31,1.90) | 28.11 (27.74,28.49) | 1.08 (0.95,1.22) | 1.63 (1.27,2.10) |
| Retired/others              | 49.53 (48.98,50.08) | 0.99 (0.87,1.14) | 1.22 (1.00,1.49) | 23.92 (23.35,24.50) | 0.87 (0.72,1.05) | 1.24 (0.97,1.67) |
| <b>Income</b>               |                     |                  |                  |                     |                  |                  |
| ≤5000                       | 47.75 (47.48,48.01) | 1.0              | 1.0              | 26.01 (25.73,26.28) | 1.0              | 1.0              |
| 5001 - 10,000               | 47.19 (46.85,47.53) | 0.98 (0.88,1.08) | 0.97 (0.81,1.15) | 25.23 (24.88,25.58) | 0.96 (0.83,1.10) | 1.01 (0.79,1.30) |
| 1,0001 - 15,000             | 55.16 (54.62,55.70) | 1.35 (1.16,1.57) | 1.20 (0.94,1.51) | 29.71 (29.09,30.33) | 1.20 (0.98,1.47) | 1.31 (0.97,1.78) |
| 15,001 – 20,000             | 59.03 (58.18,59.87) | 1.58 (1.27,1.97) | 1.34 (0.99,1.80) | 33.82 (32.78,34.86) | 1.45 (1.08,1.95) | 1.58 (1.07,2.34) |
| >20,000                     | 58.28 (57.12,59.45) | 1.53 (1.14,2.04) | 1.07 (0.75,1.53) | 35.23 (33.82,36.63) | 1.55 (1.07,2.23) | 1.38 (0.91,2.20) |
| <b>Moderate exercise</b>    |                     |                  |                  |                     |                  |                  |
| Never                       | 51.12 (50.88,51.36) | 1.0              | 1.0              | 27.75 (27.49,28.01) | 1.0              | 1.0              |
| 1                           | 47.78 (47.12,48.45) | 0.87 (0.75,1.02) | 0.80 (0.67,0.94) | 23.32 (22.64,23.99) | 1.26 (1.01,1.57) | 0.70 (0.55,0.88) |
| 2-3                         | 45.27 (44.77,45.78) | 0.79 (0.70,0.90) | 0.78 (0.68,0.89) | 25.31 (24.79,25.82) | 1.11 (0.86,1.44) | 0.83 (0.69,0.99) |
| 4-5                         | 45.73 (45.10,46.36) | 0.80 (0.69,0.94) | 0.77 (0.65,0.90) | 25.17 (24.53,25.82) | 1.11 (0.83,1.47) | 0.80 (0.65,0.99) |
| >5                          | 46.18 (45.51,46.86) | 0.82 (0.70,0.96) | 0.83 (0.70,0.99) | 26.24 (25.55,26.94) | 1.17 (0.88,1.56) | 0.88 (0.70,1.11) |
| <b>Soda per day</b>         |                     |                  |                  |                     |                  |                  |
| None                        | 49.60 (49.36,49.85) | 1.0              | 1.0              | 26.40 (26.14,26.66) | 1.0              | 1.0              |
| 1-2                         | 49.81 (49.49,50.14) | 1.01 (0.92,1.10) | 0.93 (0.84,1.03) | 27.56 (27.21,27.91) | 0.94 (0.83,1.06) | 0.94 (0.82,1.07) |
| 3-4                         | 45.60 (44.90,46.30) | 0.85 (0.72,1.00) | 0.79 (0.65,0.94) | 25.49 (24.78,26.21) | 0.90 (0.71,1.13) | 0.81 (0.63,1.03) |
| ≥5                          | 41.84 (40.55,43.14) | 0.73 (0.54,0.99) | 0.78 (0.56,1.08) | 26.32 (25.02,27.62) | 0.94 (0.64,1.38) | 0.95 (0.63,1.44) |
| <b>Time walking at work</b> |                     |                  |                  |                     |                  |                  |
| Never                       | 47.22 (45.91,48.53) | 1.0              | 1.0              | 23.60 (22.26,24.90) | 1.0              | 1.0              |

|    |                               |                     |                  |                  |                     |                  |                  |
|----|-------------------------------|---------------------|------------------|------------------|---------------------|------------------|------------------|
| 1  |                               |                     |                  |                  |                     |                  |                  |
| 2  |                               |                     |                  |                  |                     |                  |                  |
| 3  | A few times                   | 51.04 (50.71,51.37) | 1.16 (0.86,1.57) | 1.15 (0.77,1.71) | 28.47 (28.11,28.83) | 1.29 (0.84,1.96) | 1.01 (0.60,1.71) |
| 4  | Sometimes                     | 50.29 (49.98,50.60) | 1.13 (0.84,1.52) | 1.18 (0.79,1.77) | 26.85 (26.51,27.18) | 1.19 (0.78,1.81) | 0.95 (0.56,1.61) |
| 5  | Most of the times             | 46.54 (46.17,46.90) | 0.97 (0.72,1.31) | 1.10 (0.73,1.65) | 25.63 (25.26,26.01) | 1.11 (0.73,1.70) | 0.93 (0.55,1.59) |
| 6  | All the times                 | 43.66 (42.69,44.63) | 0.87 (0.60,1.25) | 0.84 (0.52,1.33) | 19.99 (19.06,20.92) | 0.81 (0.48,1.36) | 0.59 (0.31,1.10) |
| 7  | <b>Time standing at work</b>  |                     |                  |                  |                     |                  |                  |
| 8  | Never                         | 48.12 (46.82,49.43) | 1.0              | 1.0              | 21.23 (19.92,22.54) | 1.0              | 1.0              |
| 9  | A few times                   | 49.48 (49.18,49.78) | 1.05 (0.78,1.42) | 0.94 (0.64,1.40) | 27.36 (27.04,27.68) | 0.71 (0.46,1.11) | 1.31 (0.76,2.25) |
| 10 | Sometimes                     | 50.86 (50.57,51.15) | 1.11 (0.83,1.50) | 1.05 (0.71,1.56) | 27.40 (27.08,27.72) | 1.00 (0.88,1.13) | 1.43 (0.83,2.47) |
| 11 | Most of the times             | 45.68 (45.24,46.12) | 0.91 (0.67,1.23) | 0.89 (0.59,1.33) | 24.96 (24.51,25.41) | 0.88 (0.75,1.04) | 1.23 (0.70,2.15) |
| 12 | All the times                 | 42.29 (40.69,43.90) | 0.79 (0.49,1.26) | 0.90 (0.52,1.58) | 19.96 (18.43,21.49) | 0.66 (0.38,1.14) | 1.19 (0.54,2.61) |
| 13 | <b>Time sitting at work</b>   |                     |                  |                  |                     |                  |                  |
| 14 | Never                         | 40.71 (38.96,42.46) | 1.0              | 1.0              | 13.44 (11.97,14.91) | 1.0              | 1.0              |
| 15 | A few times                   | 48.82 (48.42,49.22) | 1.39 (0.92,2.10) | 1.41 (0.89,2.25) | 26.37 (25.95,26.79) | 2.31 (1.13,4.72) | 2.45 (1.15,5.20) |
| 16 | Sometimes                     | 48.30 (47.95,48.64) | 1.36 (0.90,2.05) | 1.35 (0.85,2.15) | 27.20 (26.84,27.57) | 2.41 (1.18,4.91) | 2.56 (1.21,5.44) |
| 17 | Most of the times             | 49.87 (49.60,50.15) | 1.45 (0.96,2.18) | 1.37 (0.86,2.17) | 26.70 (26.41,27.00) | 2.35 (1.15,4.77) | 2.25 (1.06,4.78) |
| 18 | All the times                 | 54.94 (53.82,56.06) | 1.78 (1.10,2.86) | 1.32 (0.79,2.22) | 29.45 (28.16,30.73) | 2.69 (1.23,5.88) | 2.03 (0.90,4.61) |
| 19 | <b>Fruits per day</b>         |                     |                  |                  |                     |                  |                  |
| 20 | 0-1                           | 50.07 (49.86,50.28) | 1.0              | 1.0              | 27.27 (27.05,27.50) | 1.0              | 1.0              |
| 21 | 2                             | 47.00 (46.52,47.48) | 0.88 (0.78,0.99) | 0.87 (0.76,1.00) | 25.50 (25.01,26.00) | 0.91 (0.78,1.07) | 0.92 (0.76,1.11) |
| 22 | 3                             | 41.56 (40.59,42.52) | 0.71 (0.56,0.89) | 0.74 (0.57,0.97) | 20.29 (19.38,21.21) | 0.68 (0.49,0.94) | 0.72 (0.50,1.04) |
| 23 | ≥4                            | 45.78 (44.33,47.24) | 0.84 (0.60,1.18) | 0.94 (0.64,1.40) | 25.56 (24.07,27.05) | 0.91 (0.58,1.44) | 1.04 (0.62,1.74) |
| 24 | <b>Vegetables per day</b>     |                     |                  |                  |                     |                  |                  |
| 25 | 0-1                           | 50.38 (50.17,50.60) | 1.0              | 1.0              | 27.66 (27.42,27.89) | 1.0              | 1.0              |
| 26 | 2                             | 45.94 (45.50,46.37) | 0.84 (0.75,0.93) | 0.85 (0.75,0.96) | 24.41 (23.97,24.86) | 0.84 (0.73,0.98) | 0.85 (0.72,1.00) |
| 27 | 3                             | 44.97 (44.18,45.75) | 0.80 (0.67,0.97) | 0.93 (0.75,1.15) | 22.97 (22.18,23.75) | 0.78 (0.60,1.01) | 0.89 (0.67,1.20) |
| 28 | ≥4                            | 48.15 (46.71,49.59) | 0.91 (0.66,1.27) | 1.11 (0.75,1.63) | 23.35 (21.87,24.84) | 0.80 (0.50,1.27) | 0.90 (0.53,1.53) |
| 29 | <b>Current smoker</b>         |                     |                  |                  |                     |                  |                  |
| 30 | No                            | 49.20 (48.99,49.40) | 1.0              | 1.0              | 26.43 (26.22,26.65) | 1.0              | 1.0              |
| 31 | Yes                           | 49.40 (48.95,49.86) | 1.01 (0.90,1.13) | 0.77 (0.67,0.88) | 28.01 (27.53,28.50) | 1.08 (0.93,1.25) | 0.82 (0.69,0.97) |
| 32 | <b>Diabetes</b>               |                     |                  |                  |                     |                  |                  |
| 33 | No                            | 48.57 (48.38,48.76) | 1.0              | 1.0              | 26.58 (26.38,26.78) | 1.0              | 1.0              |
| 34 | Yes                           | 61.93 (61.11,62.74) | 1.72 (1.42,2.09) | 1.29 (1.04,1.59) | 29.84 (28.81,30.88) | 1.17 (8964,1.55) | 0.93 (0.69,1.26) |
| 35 | <b>BMI (kg/m<sup>2</sup>)</b> |                     |                  |                  |                     |                  |                  |
| 36 | Underweight                   | 29.15 (28.51,29.79) | 1.0              | 1.0              | 15.34 (14.79,15.89) | 1.0              | 1.0              |
| 37 | Normal weight                 | 41.90 (41.61,42.18) | 1.75 (1.46,2.10) | 1.83 (1.52,2.21) | 23.54 (23.26,23.82) | 1.70 (1.32,2.18) | 1.84 (1.45,2.42) |
| 38 | Overweight                    | 54.09 (53.75,54.43) | 2.86 (2.38,3.45) | 2.79 (2.29,3.40) | 29.60 (29.22,29.99) | 2.32 (1.80,2.99) | 2.51 (1.92,3.29) |
| 39 | Obese                         | 62.40 (61.99,62.81) | 4.03 (3.32,4.90) | 3.63 (2.89,4.56) | 34.86 (34.34,35.39) | 2.95 (2.26,3.85) | 3.33 (2.44,4.54) |
| 40 | Extremely Obese               | 70.95 (69.72,72.19) | 5.93 (4.09,8.59) | 4.80 (3.23,7.19) | 44.38 (42.51,46.25) | 4.40 (2.73,7.09) | 4.76 (2.84,7.98) |
| 41 | <b>Waist Circumference</b>    |                     |                  |                  |                     |                  |                  |
| 42 | Normal                        | 43.78 (43.55,44.00) | 1.0              | 1.0              | 24.29 (24.06,24.51) | 1.0              | 1.0              |
| 43 | Not Normal                    | 61.05 (60.72,61.37) | 2.01 (1.84,2.20) | 1.18 (1.03,1.35) | 33.36 (32.95,33.77) | 1.56 (1.38,1.76) | 1.11 (0.92,1.33) |
| 44 | <b>Waist to hip ratio</b>     |                     |                  |                  |                     |                  |                  |
| 45 | Normal                        | 47.28 (47.08,47.49) | 1.0              | 1.0              | 26.04 (25.83,26.25) | 1.0              | 1.0              |
| 46 | Not Normal                    | 58.78 (58.34,59.23) | 1.59 (1.42,1.77) | 1.26 (1.10,1.44) | 30.62(30.08,31.16)  | 1.25 (1.07,1.46) | 1.15 (0.96,1.38) |
| 47 |                               |                     |                  |                  |                     |                  |                  |

For peer review only

1  
2  
3  
4  
5  
6  
7  
8  
9  
10  
11  
12  
13  
14  
15  
16  
17  
18  
19  
20  
21  
22  
23  
24  
25  
26  
27  
28  
29  
30  
31  
32  
33  
34  
35  
36  
37  
38  
39  
40  
41  
42  
43  
44  
45  
46  
47

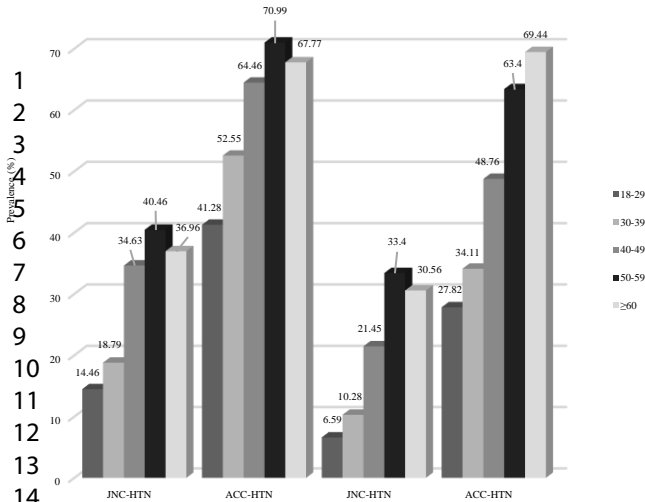

15  
16  
17  
18  
19  
20  
21  
22  
23  
24  
25  
26  
27  
28  
29  
30  
31  
32  
33  
34  
35  
36  
37  
38  
39  
40  
41  
42  
43  
44  
45  
46  
47  
48  
49  
50  
51  
52  
53  
54  
55  
56  
57  
58  
59  
60  
61  
62  
63  
64  
65  
66  
67  
68  
69  
70  
71  
72  
73  
74  
75  
76  
77  
78  
79  
80  
81  
82  
83  
84  
85  
86  
87  
88  
89  
90  
91  
92  
93  
94  
95  
96  
97  
98  
99  
100  
101  
102  
103  
104  
105  
106  
107  
108  
109  
110  
111  
112  
113  
114  
115  
116  
117  
118  
119  
120  
121  
122  
123  
124  
125  
126  
127  
128  
129  
130  
131  
132  
133  
134  
135  
136  
137  
138  
139  
140  
141  
142  
143  
144  
145  
146  
147  
148  
149  
150  
151  
152  
153  
154  
155  
156  
157  
158  
159  
160  
161  
162  
163  
164  
165  
166  
167  
168  
169  
170  
171  
172  
173  
174  
175  
176  
177  
178  
179  
180  
181  
182  
183  
184  
185  
186  
187  
188  
189  
190  
191  
192  
193  
194  
195  
196  
197  
198  
199  
200  
201  
202  
203  
204  
205  
206  
207  
208  
209  
210  
211  
212  
213  
214  
215  
216  
217  
218  
219  
220  
221  
222  
223  
224  
225  
226  
227  
228  
229  
230  
231  
232  
233  
234  
235  
236  
237  
238  
239  
240  
241  
242  
243  
244  
245  
246  
247  
248  
249  
250  
251  
252  
253  
254  
255  
256  
257  
258  
259  
260  
261  
262  
263  
264  
265  
266  
267  
268  
269  
270  
271  
272  
273  
274  
275  
276  
277  
278  
279  
280  
281  
282  
283  
284  
285  
286  
287  
288  
289  
290  
291  
292  
293  
294  
295  
296  
297  
298  
299  
300  
301  
302  
303  
304  
305  
306  
307  
308  
309  
310  
311  
312  
313  
314  
315  
316  
317  
318  
319  
320  
321  
322  
323  
324  
325  
326  
327  
328  
329  
330  
331  
332  
333  
334  
335  
336  
337  
338  
339  
340  
341  
342  
343  
344  
345  
346  
347  
348  
349  
350  
351  
352  
353  
354  
355  
356  
357  
358  
359  
360  
361  
362  
363  
364  
365  
366  
367  
368  
369  
370  
371  
372  
373  
374  
375  
376  
377  
378  
379  
380  
381  
382  
383  
384  
385  
386  
387  
388  
389  
390  
391  
392  
393  
394  
395  
396  
397  
398  
399  
400  
401  
402  
403  
404  
405  
406  
407  
408  
409  
410  
411  
412  
413  
414  
415  
416  
417  
418  
419  
420  
421  
422  
423  
424  
425  
426  
427  
428  
429  
430  
431  
432  
433  
434  
435  
436  
437  
438  
439  
440  
441  
442  
443  
444  
445  
446  
447  
448  
449  
450  
451  
452  
453  
454  
455  
456  
457  
458  
459  
460  
461  
462  
463  
464  
465  
466  
467  
468  
469  
470  
471  
472  
473  
474  
475  
476  
477  
478  
479  
480  
481  
482  
483  
484  
485  
486  
487  
488  
489  
490  
491  
492  
493  
494  
495  
496  
497  
498  
499  
500  
501  
502  
503  
504  
505  
506  
507  
508  
509  
510  
511  
512  
513  
514  
515  
516  
517  
518  
519  
520  
521  
522  
523  
524  
525  
526  
527  
528  
529  
530  
531  
532  
533  
534  
535  
536  
537  
538  
539  
540  
541  
542  
543  
544  
545  
546  
547  
548  
549  
550  
551  
552  
553  
554  
555  
556  
557  
558  
559  
560  
561  
562  
563  
564  
565  
566  
567  
568  
569  
570  
571  
572  
573  
574  
575  
576  
577  
578  
579  
580  
581  
582  
583  
584  
585  
586  
587  
588  
589  
590  
591  
592  
593  
594  
595  
596  
597  
598  
599  
600  
601  
602  
603  
604  
605  
606  
607  
608  
609  
610  
611  
612  
613  
614  
615  
616  
617  
618  
619  
620  
621  
622  
623  
624  
625  
626  
627  
628  
629  
630  
631  
632  
633  
634  
635  
636  
637  
638  
639  
640  
641  
642  
643  
644  
645  
646  
647  
648  
649  
650  
651  
652  
653  
654  
655  
656  
657  
658  
659  
660  
661  
662  
663  
664  
665  
666  
667  
668  
669  
670  
671  
672  
673  
674  
675  
676  
677  
678  
679  
680  
681  
682  
683  
684  
685  
686  
687  
688  
689  
690  
691  
692  
693  
694  
695  
696  
697  
698  
699  
700  
701  
702  
703  
704  
705  
706  
707  
708  
709  
710  
711  
712  
713  
714  
715  
716  
717  
718  
719  
720  
721  
722  
723  
724  
725  
726  
727  
728  
729  
730  
731  
732  
733  
734  
735  
736  
737  
738  
739  
740  
741  
742  
743  
744  
745  
746  
747  
748  
749  
750  
751  
752  
753  
754  
755  
756  
757  
758  
759  
760  
761  
762  
763  
764  
765  
766  
767  
768  
769  
770  
771  
772  
773  
774  
775  
776  
777  
778  
779  
780  
781  
782  
783  
784  
785  
786  
787  
788  
789  
790  
791  
792  
793  
794  
795  
796  
797  
798  
799  
800  
801  
802  
803  
804  
805  
806  
807  
808  
809  
810  
811  
812  
813  
814  
815  
816  
817  
818  
819  
820  
821  
822  
823  
824  
825  
826  
827  
828  
829  
830  
831  
832  
833  
834  
835  
836  
837  
838  
839  
840  
841  
842  
843  
844  
845  
846  
847  
848  
849  
850  
851  
852  
853  
854  
855  
856  
857  
858  
859  
860  
861  
862  
863  
864  
865  
866  
867  
868  
869  
870  
871  
872  
873  
874  
875  
876  
877  
878  
879  
880  
881  
882  
883  
884  
885  
886  
887  
888  
889  
890  
891  
892  
893  
894  
895  
896  
897  
898  
899  
900  
901  
902  
903  
904  
905  
906  
907  
908  
909  
910  
911  
912  
913  
914  
915  
916  
917  
918  
919  
920  
921  
922  
923  
924  
925  
926  
927  
928  
929  
930  
931  
932  
933  
934  
935  
936  
937  
938  
939  
940  
941  
942  
943  
944  
945  
946  
947  
948  
949  
950  
951  
952  
953  
954  
955  
956  
957  
958  
959  
960  
961  
962  
963  
964  
965  
966  
967  
968  
969  
970  
971  
972  
973  
974  
975  
976  
977  
978  
979  
980  
981  
982  
983  
984  
985  
986  
987  
988  
989  
990  
991  
992  
993  
994  
995  
996  
997  
998  
999  
1000

Figure 1. Prevalence of hypertension based on JNC-7 and 2017 ACC/AHA guidelines among Saudi Biobank males and females (2017-2020) stratified by age (n= 10799)

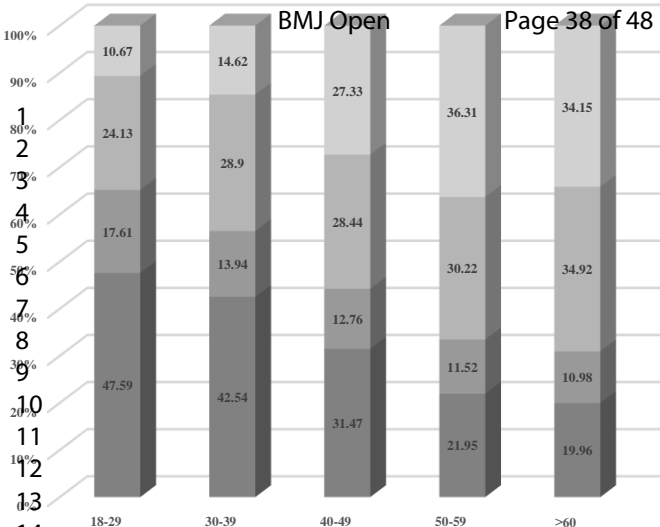

15  
16  
17  
18  
19  
20  
21  
22  
23  
24  
25  
26  
27  
28  
29  
30  
31  
32  
33  
34  
35  
36  
37  
38  
39  
40  
41  
42  
43  
44  
45  
46  
47  
48  
49  
50  
51  
52  
53  
54  
55  
56  
57  
58  
59  
60  
61  
62  
63  
64  
65  
66  
67  
68  
69  
70  
71  
72  
73  
74  
75  
76  
77  
78  
79  
80  
81  
82  
83  
84  
85  
86  
87  
88  
89  
90  
91  
92  
93  
94  
95  
96  
97  
98  
99  
100  
101  
102  
103  
104  
105  
106  
107  
108  
109  
110  
111  
112  
113  
114  
115  
116  
117  
118  
119  
120  
121  
122  
123  
124  
125  
126  
127  
128  
129  
130  
131  
132  
133  
134  
135  
136  
137  
138  
139  
140  
141  
142  
143  
144  
145  
146  
147  
148  
149  
150  
151  
152  
153  
154  
155  
156  
157  
158  
159  
160  
161  
162  
163  
164  
165  
166  
167  
168  
169  
170  
171  
172  
173  
174  
175  
176  
177  
178  
179  
180  
181  
182  
183  
184  
185  
186  
187  
188  
189  
190  
191  
192  
193  
194  
195  
196  
197  
198  
199  
200  
201  
202  
203  
204  
205  
206  
207  
208  
209  
210  
211  
212  
213  
214  
215  
216  
217  
218  
219  
220  
221  
222  
223  
224  
225  
226  
227  
228  
229  
230  
231  
232  
233  
234  
235  
236  
237  
238  
239  
240  
241  
242  
243  
244  
245  
246  
247  
248  
249  
250  
251  
252  
253  
254  
255  
256  
257  
258  
259  
260  
261  
262  
263  
264  
265  
266  
267  
268  
269  
270  
271  
272  
273  
274  
275  
276  
277  
278  
279  
280  
281  
282  
283  
284  
285  
286  
287  
288  
289  
290  
291  
292  
293  
294  
295  
296  
297  
298  
299  
300  
301  
302  
303  
304  
305  
306  
307  
308  
309  
310  
311  
312  
313  
314  
315  
316  
317  
318  
319  
320  
321  
322  
323  
324  
325  
326  
327  
328  
329  
330  
331  
332  
333  
334  
335  
336  
337  
338  
339  
340  
341  
342  
343  
344  
345  
346  
347  
348  
349  
350  
351  
352  
353  
354  
355  
356  
357  
358  
359  
360  
361  
362  
363  
364  
365  
366  
367  
368  
369  
370  
371  
372  
373  
374  
375  
376  
377  
378  
379  
380  
381  
382  
383  
384  
385  
386  
387  
388  
389  
390  
391  
392  
393  
394  
395  
396  
397  
398  
399  
400  
401  
402  
403  
404  
405  
406  
407  
408  
409  
410  
411  
412  
413  
414  
415  
416  
417  
418  
419  
420  
421  
422  
423  
424  
425  
426  
427  
428  
429  
430  
431  
432  
433  
434  
435  
436  
437  
438  
439  
440  
441  
442  
443  
444  
445  
446  
447  
448  
449  
450  
451  
452  
453  
454  
455  
456  
457  
458  
459  
460  
461  
462  
463  
464  
465  
466  
467  
468  
469  
470  
471  
472  
473  
474  
475  
476  
477  
478  
479  
480  
481  
482  
483  
484  
485  
486  
487  
488  
489  
490  
491  
492  
493  
494  
495  
496  
497  
498  
499  
500  
501  
502  
503  
504  
505  
506  
507  
508  
509  
510  
511  
512  
513  
514  
515  
516  
517  
518  
519  
520  
521  
522  
523  
524  
525  
526  
527  
528  
529  
530  
531  
532  
533  
534  
535  
536  
537  
538  
539  
540  
541  
542  
543  
544  
545  
546  
547  
548  
549  
550  
551  
552  
553  
554  
555  
556  
557  
558  
559  
560  
561  
562  
563  
564  
565  
566  
567  
568  
569  
570  
571  
572  
573  
574  
575  
576  
577  
578  
579  
580  
581  
582  
583  
584  
585  
586  
587  
588  
589  
590  
591  
592  
593  
594  
595  
596  
597  
598  
599  
600  
601  
602  
603  
604  
605  
606  
607  
608  
609  
610  
611  
612  
613  
614  
615  
616  
617  
618  
619  
620  
621  
622  
623  
624  
625  
626  
627  
628  
629  
630  
631  
632  
633  
634  
635  
636  
637  
638  
639  
640  
641  
642  
643  
644  
645  
646  
647  
648  
649  
650  
651  
652  
653  
654  
655  
656  
657  
658  
659  
660  
661  
662  
663  
664  
665  
666  
667  
668  
669  
670  
671  
672  
673  
674  
675  
676  
677  
678  
679  
680  
681  
682  
683  
684  
685  
686  
687  
688  
689  
690  
691  
692  
693  
694  
695  
696  
697  
698  
699  
700  
701  
702  
703  
704  
705  
706  
707  
708  
709  
710  
711  
712  
713  
714  
715  
716  
717  
718  
719  
720  
721  
722  
723  
724  
725  
726  
727  
728  
729  
730  
731  
732  
733  
734  
735  
736  
737  
738  
739  
740  
741  
742  
743  
744  
745  
746  
747  
748  
749  
750  
751  
752  
753  
754  
755  
756  
757  
758  
759  
760  
761  
762  
763  
764  
765  
766  
767  
768  
769  
770  
771  
772  
773  
774  
775  
776  
777  
778  
779  
780  
781  
782  
783  
784  
785  
786  
787  
788  
789  
790  
791  
792  
793  
794  
795  
796  
797  
798  
799  
800  
801  
802  
803  
804  
805  
806  
807  
808  
809  
810  
811  
812  
813  
814  
815  
816  
817  
818  
819  
820  
821  
822  
823  
824  
825  
826  
827  
828  
829  
830  
831  
832  
833  
834  
835  
836  
837  
838  
839  
840  
841  
842  
843  
844  
845  
846  
847  
848  
849  
850  
851  
852  
853  
854  
855  
856  
857  
858  
859  
860  
861  
862  
863  
864  
865  
866  
867  
868  
869  
870  
871  
872  
873  
874  
875  
876  
877  
878  
879  
880  
881  
882  
883  
884  
885  
886  
887  
888  
889  
890  
891  
892  
893  
894  
895  
896  
897  
898  
899  
900  
901  
902  
903  
904  
905  
906  
907  
908  
909  
910  
911  
912  
913  
914  
915  
916  
917  
918  
919  
920  
921  
922  
923  
924  
925  
926  
927  
928  
929  
930  
931  
932  
933  
934  
935  
936  
937  
938  
939  
940  
941  
942  
943  
944  
945  
946  
947  
948  
949  
950  
951  
952  
953  
954  
955  
956  
957  
958  
959  
960  
961  
962  
963  
964  
965  
966  
967  
968  
969  
970  
971  
972  
973  
974  
975  
976  
977  
978  
979  
980  
981  
982  
983  
984  
985  
986  
987  
988  
989  
990  
991  
992  
993  
994  
995  
996  
997  
998  
999  
1000

Figure 2. Prevalence of BP stages defined by ACC/AHA guideline among Saudi Biobank population stratified by age (n=10799)



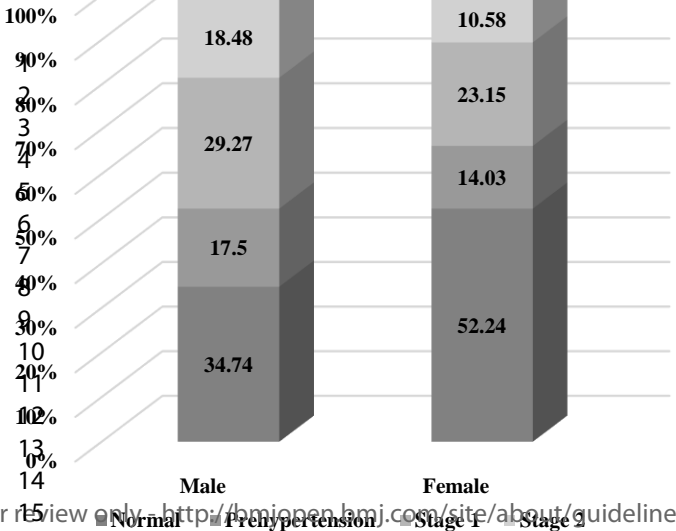

Figure 3. Prevalence of BP stages defined by 2017 ACC/AHA guideline in males compared to females of the SBB population (n=10799)

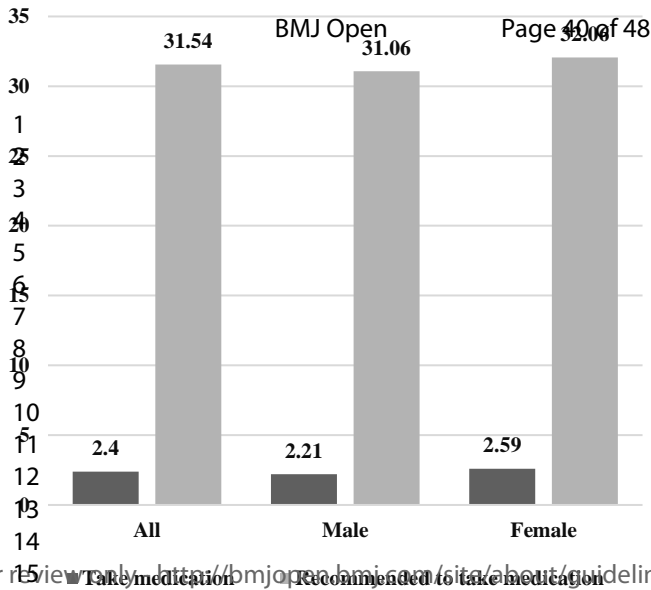

Figure 4. Prevalence of hypertension according to self-report, SBB 2017-2020

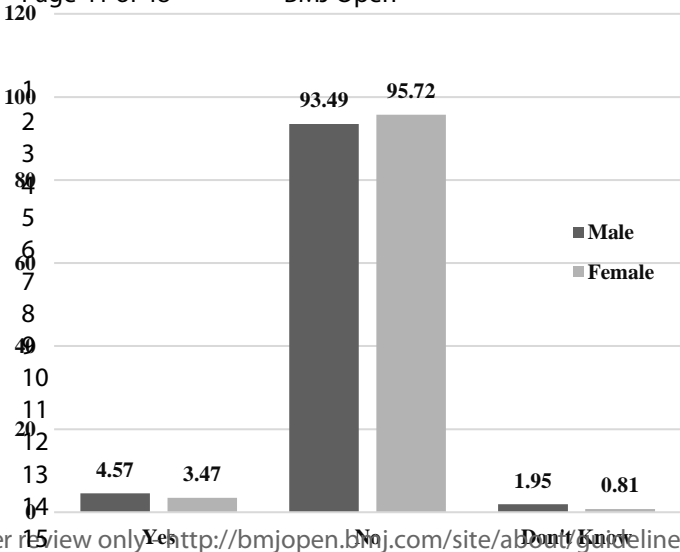

Figure 5. Prevalence of adults diagnosed with hypertension according to 2017 ACA/AHA and recommended taking antihypertensives vs adults already taking antihypertensives, SBB2017-2020

# Reporting checklist for cross sectional study.

Based on the STROBE cross sectional guidelines.

## Instructions to authors

Complete this checklist by entering the page numbers from your manuscript where readers will find each of the items listed below.

Your article may not currently address all the items on the checklist. Please modify your text to include the missing information. If you are certain that an item does not apply, please write "n/a" and provide a short explanation.

Upload your completed checklist as an extra file when you submit to a journal.

In your methods section, say that you used the STROBE cross sectional reporting guidelines, and cite them as:

von Elm E, Altman DG, Egger M, Pocock SJ, Gotsche PC, Vandenbroucke JP. The Strengthening the Reporting of Observational Studies in Epidemiology (STROBE) Statement: guidelines for reporting observational studies.

|  | Reporting Item                                                                                         | Page Number |
|--|--------------------------------------------------------------------------------------------------------|-------------|
|  | <b>Title and abstract</b>                                                                              |             |
|  | <b>Title</b>                                                                                           |             |
|  | <a href="#">#1a</a> Indicate the study's design with a commonly used term in the title or the abstract | 1           |

|    |                     |                     |                                |           |
|----|---------------------|---------------------|--------------------------------|-----------|
| 1  | Abstract            | <a href="#">#1b</a> | Provide in the abstract an     | 2,3       |
| 2  |                     |                     |                                |           |
| 3  |                     |                     | informative and balanced       |           |
| 4  |                     |                     |                                |           |
| 5  |                     |                     | summary of what was done       |           |
| 6  |                     |                     |                                |           |
| 7  |                     |                     | and what was found             |           |
| 8  |                     |                     |                                |           |
| 9  |                     |                     |                                |           |
| 10 |                     |                     |                                |           |
| 11 | <b>Introduction</b> |                     |                                |           |
| 12 |                     |                     |                                |           |
| 13 |                     |                     |                                |           |
| 14 | Background /        | <a href="#">#2</a>  | Explain the scientific         | 3,4       |
| 15 | rationale           |                     | background and rationale for   |           |
| 16 |                     |                     | the investigation being        |           |
| 17 |                     |                     | reported                       |           |
| 18 |                     |                     |                                |           |
| 19 |                     |                     |                                |           |
| 20 |                     |                     |                                |           |
| 21 |                     |                     |                                |           |
| 22 |                     |                     |                                |           |
| 23 |                     |                     |                                |           |
| 24 | Objectives          | <a href="#">#3</a>  | State specific objectives,     | 4         |
| 25 |                     |                     | including any prespecified     |           |
| 26 |                     |                     | hypotheses                     |           |
| 27 |                     |                     |                                |           |
| 28 |                     |                     |                                |           |
| 29 |                     |                     |                                |           |
| 30 |                     |                     |                                |           |
| 31 | <b>Methods</b>      |                     |                                |           |
| 32 |                     |                     |                                |           |
| 33 |                     |                     |                                |           |
| 34 |                     |                     |                                |           |
| 35 | Study design        | <a href="#">#4</a>  | Present key elements of        | 5         |
| 36 |                     |                     | study design early in the      |           |
| 37 |                     |                     | paper                          |           |
| 38 |                     |                     |                                |           |
| 39 |                     |                     |                                |           |
| 40 |                     |                     |                                |           |
| 41 |                     |                     |                                |           |
| 42 | Setting             | <a href="#">#5</a>  | Describe the setting,          | 5,6,7,8,9 |
| 43 |                     |                     | locations, and relevant dates, |           |
| 44 |                     |                     | including periods of           |           |
| 45 |                     |                     | recruitment, exposure, follow- |           |
| 46 |                     |                     | up, and data collection        |           |
| 47 |                     |                     |                                |           |
| 48 |                     |                     |                                |           |
| 49 |                     |                     |                                |           |
| 50 |                     |                     |                                |           |
| 51 |                     |                     |                                |           |
| 52 |                     |                     |                                |           |
| 53 |                     |                     |                                |           |
| 54 |                     |                     |                                |           |
| 55 |                     |                     |                                |           |
| 56 |                     |                     |                                |           |
| 57 |                     |                     |                                |           |
| 58 |                     |                     |                                |           |
| 59 |                     |                     |                                |           |
| 60 |                     |                     |                                |           |

|    |                      |                     |                                    |           |
|----|----------------------|---------------------|------------------------------------|-----------|
| 1  | Eligibility criteria | <a href="#">#6a</a> | Give the eligibility criteria, and | 9         |
| 2  |                      |                     |                                    |           |
| 3  |                      |                     | the sources and methods of         |           |
| 4  |                      |                     | selection of participants.         |           |
| 5  |                      |                     |                                    |           |
| 6  |                      |                     |                                    |           |
| 7  |                      |                     |                                    |           |
| 8  |                      |                     |                                    |           |
| 9  |                      | <a href="#">#7</a>  | Clearly define all outcomes,       | 5,6,7,8   |
| 10 |                      |                     | exposures, predictors,             |           |
| 11 |                      |                     | potential confounders, and         |           |
| 12 |                      |                     | effect modifiers. Give             |           |
| 13 |                      |                     | diagnostic criteria, if            |           |
| 14 |                      |                     | applicable                         |           |
| 15 |                      |                     |                                    |           |
| 16 |                      |                     |                                    |           |
| 17 |                      |                     |                                    |           |
| 18 |                      |                     |                                    |           |
| 19 |                      |                     |                                    |           |
| 20 |                      |                     |                                    |           |
| 21 |                      |                     |                                    |           |
| 22 |                      |                     |                                    |           |
| 23 | Data sources /       | <a href="#">#8</a>  | For each variable of interest      | 5,6,7,8   |
| 24 | measurement          |                     | give sources of data and           |           |
| 25 |                      |                     | details of methods of              |           |
| 26 |                      |                     | assessment (measurement).          |           |
| 27 |                      |                     | Describe comparability of          |           |
| 28 |                      |                     | assessment methods if there        |           |
| 29 |                      |                     | is more than one group. Give       |           |
| 30 |                      |                     | information separately for for     |           |
| 31 |                      |                     | exposed and unexposed              |           |
| 32 |                      |                     | groups if applicable.              |           |
| 33 |                      |                     |                                    |           |
| 34 |                      |                     |                                    |           |
| 35 |                      |                     |                                    |           |
| 36 |                      |                     |                                    |           |
| 37 |                      |                     |                                    |           |
| 38 |                      |                     |                                    |           |
| 39 |                      |                     |                                    |           |
| 40 |                      |                     |                                    |           |
| 41 |                      |                     |                                    |           |
| 42 |                      |                     |                                    |           |
| 43 |                      |                     |                                    |           |
| 44 |                      |                     |                                    |           |
| 45 |                      |                     |                                    |           |
| 46 |                      |                     |                                    |           |
| 47 | Bias                 | <a href="#">#9</a>  | Describe any efforts to            | 5,6,7,8,9 |
| 48 |                      |                     | address potential sources of       |           |
| 49 |                      |                     | bias                               |           |
| 50 |                      |                     |                                    |           |
| 51 |                      |                     |                                    |           |
| 52 |                      |                     |                                    |           |
| 53 |                      |                     |                                    |           |
| 54 | Study size           | <a href="#">#10</a> | Explain how the study size         | 9         |
| 55 |                      |                     | was arrived at                     |           |
| 56 |                      |                     |                                    |           |
| 57 |                      |                     |                                    |           |
| 58 |                      |                     |                                    |           |
| 59 |                      |                     |                                    |           |
| 60 |                      |                     |                                    |           |

|    |                |                      |                               |     |
|----|----------------|----------------------|-------------------------------|-----|
| 1  | Quantitative   | <a href="#">#11</a>  | Explain how quantitative      | 8,9 |
| 2  |                |                      |                               |     |
| 3  | variables      |                      | variables were handled in the |     |
| 4  |                |                      |                               |     |
| 5  |                |                      | analyses. If applicable,      |     |
| 6  |                |                      |                               |     |
| 7  |                |                      | describe which groupings      |     |
| 8  |                |                      |                               |     |
| 9  |                |                      | were chosen, and why          |     |
| 10 |                |                      |                               |     |
| 11 |                |                      |                               |     |
| 12 |                |                      |                               |     |
| 13 | Statistical    | <a href="#">#12a</a> | Describe all statistical      | 8,9 |
| 14 |                |                      |                               |     |
| 15 | methods        |                      | methods, including those      |     |
| 16 |                |                      |                               |     |
| 17 |                |                      | used to control for           |     |
| 18 |                |                      |                               |     |
| 19 |                |                      | confounding                   |     |
| 20 |                |                      |                               |     |
| 21 |                |                      |                               |     |
| 22 |                |                      |                               |     |
| 23 | Statistical    | <a href="#">#12b</a> | Describe any methods used     | 8,9 |
| 24 |                |                      |                               |     |
| 25 | methods        |                      | to examine subgroups and      |     |
| 26 |                |                      |                               |     |
| 27 |                |                      | interactions                  |     |
| 28 |                |                      |                               |     |
| 29 |                |                      |                               |     |
| 30 |                |                      |                               |     |
| 31 | Statistical    | <a href="#">#12c</a> | Explain how missing data      | 9   |
| 32 |                |                      |                               |     |
| 33 | methods        |                      | were addressed                |     |
| 34 |                |                      |                               |     |
| 35 |                |                      |                               |     |
| 36 | Statistical    | <a href="#">#12d</a> | If applicable, describe       | n/a |
| 37 |                |                      |                               |     |
| 38 | methods        |                      | analytical methods taking     |     |
| 39 |                |                      |                               |     |
| 40 |                |                      | account of sampling strategy  |     |
| 41 |                |                      |                               |     |
| 42 |                |                      |                               |     |
| 43 |                |                      |                               |     |
| 44 | Statistical    | <a href="#">#12e</a> | Describe any sensitivity      | 9   |
| 45 |                |                      |                               |     |
| 46 | methods        |                      | analyses                      |     |
| 47 |                |                      |                               |     |
| 48 |                |                      |                               |     |
| 49 | <b>Results</b> |                      |                               |     |
| 50 |                |                      |                               |     |
| 51 |                |                      |                               |     |
| 52 | Participants   | <a href="#">#13a</a> | Report numbers of individuals | 9   |
| 53 |                |                      |                               |     |
| 54 |                |                      | at each stage of study—eg     |     |
| 55 |                |                      |                               |     |
| 56 |                |                      | numbers potentially eligible, |     |
| 57 |                |                      |                               |     |
| 58 |                |                      |                               |     |
| 59 |                |                      |                               |     |
| 60 |                |                      |                               |     |

|    |                  |                                                    |                                          |
|----|------------------|----------------------------------------------------|------------------------------------------|
| 1  |                  | examined for eligibility,                          |                                          |
| 2  |                  | confirmed eligible, included in                    |                                          |
| 3  |                  | the study, completing follow-                      |                                          |
| 4  |                  | up, and analysed. Give                             |                                          |
| 5  |                  | information separately for for                     |                                          |
| 6  |                  | exposed and unexposed                              |                                          |
| 7  |                  | groups if applicable.                              |                                          |
| 8  |                  |                                                    |                                          |
| 9  |                  |                                                    |                                          |
| 10 |                  |                                                    |                                          |
| 11 |                  |                                                    |                                          |
| 12 |                  |                                                    |                                          |
| 13 |                  |                                                    |                                          |
| 14 |                  |                                                    |                                          |
| 15 |                  |                                                    |                                          |
| 16 |                  |                                                    |                                          |
| 17 | Participants     | <a href="#">#13b</a> Give reasons for non-         | 9                                        |
| 18 |                  | participation at each stage                        |                                          |
| 19 |                  |                                                    |                                          |
| 20 |                  |                                                    |                                          |
| 21 |                  |                                                    |                                          |
| 22 | Participants     | <a href="#">#13c</a> Consider use of a flow        | n/a                                      |
| 23 |                  | diagram                                            |                                          |
| 24 |                  |                                                    |                                          |
| 25 |                  |                                                    |                                          |
| 26 |                  |                                                    |                                          |
| 27 |                  |                                                    |                                          |
| 28 | Descriptive data | <a href="#">#14a</a> Give characteristics of study | 9,10,11,12,13,25,26,27,28,29,30,31,32,33 |
| 29 |                  | participants (eg demographic,                      |                                          |
| 30 |                  | clinical, social) and                              |                                          |
| 31 |                  | information on exposures and                       |                                          |
| 32 |                  | potential confounders. Give                        |                                          |
| 33 |                  | information separately for                         |                                          |
| 34 |                  | exposed and unexposed                              |                                          |
| 35 |                  | groups if applicable.                              |                                          |
| 36 |                  |                                                    |                                          |
| 37 |                  |                                                    |                                          |
| 38 |                  |                                                    |                                          |
| 39 |                  |                                                    |                                          |
| 40 |                  |                                                    |                                          |
| 41 |                  |                                                    |                                          |
| 42 |                  |                                                    |                                          |
| 43 |                  |                                                    |                                          |
| 44 |                  |                                                    |                                          |
| 45 |                  |                                                    |                                          |
| 46 |                  |                                                    |                                          |
| 47 | Descriptive data | <a href="#">#14b</a> Indicate number of            | 25,26,27,28                              |
| 48 |                  | participants with missing data                     |                                          |
| 49 |                  | for each variable of interest                      |                                          |
| 50 |                  |                                                    |                                          |
| 51 |                  |                                                    |                                          |
| 52 |                  |                                                    |                                          |
| 53 |                  |                                                    |                                          |
| 54 | Outcome data     | <a href="#">#15</a> Report numbers of outcome      | 30,31,32,33                              |
| 55 |                  | events or summary                                  |                                          |
| 56 |                  |                                                    |                                          |
| 57 |                  |                                                    |                                          |
| 58 |                  |                                                    |                                          |
| 59 |                  |                                                    |                                          |
| 60 |                  |                                                    |                                          |



measures. Give information separately for exposed and unexposed groups if applicable.

|    |                |                                                 |                           |
|----|----------------|-------------------------------------------------|---------------------------|
| 1  |                |                                                 |                           |
| 2  |                |                                                 |                           |
| 3  |                |                                                 |                           |
| 4  |                |                                                 |                           |
| 5  |                |                                                 |                           |
| 6  |                |                                                 |                           |
| 7  |                |                                                 |                           |
| 8  |                |                                                 |                           |
| 9  |                |                                                 |                           |
| 10 | Main results   | <a href="#">#16a</a> Give unadjusted estimates  | 11,12                     |
| 11 |                |                                                 |                           |
| 12 |                | and, if applicable,                             |                           |
| 13 |                |                                                 |                           |
| 14 |                | confounder-adjusted                             |                           |
| 15 |                | estimates and their precision                   |                           |
| 16 |                | (eg, 95% confidence interval).                  |                           |
| 17 |                | Make clear which                                |                           |
| 18 |                | confounders were adjusted                       |                           |
| 19 |                | for and why they were                           |                           |
| 20 |                | included                                        |                           |
| 21 |                |                                                 |                           |
| 22 |                |                                                 |                           |
| 23 |                |                                                 |                           |
| 24 |                |                                                 |                           |
| 25 |                |                                                 |                           |
| 26 |                |                                                 |                           |
| 27 |                |                                                 |                           |
| 28 |                |                                                 |                           |
| 29 |                |                                                 |                           |
| 30 |                |                                                 |                           |
| 31 | Main results   | <a href="#">#16b</a> Report category boundaries | 10,11,29                  |
| 32 |                | when continuous variables                       |                           |
| 33 |                | were categorized                                |                           |
| 34 |                |                                                 |                           |
| 35 |                |                                                 |                           |
| 36 |                |                                                 |                           |
| 37 |                |                                                 |                           |
| 38 |                |                                                 |                           |
| 39 | Main results   | <a href="#">#16c</a> If relevant, consider      | n/a                       |
| 40 |                | translating estimates of                        |                           |
| 41 |                | relative risk into absolute risk                |                           |
| 42 |                | for a meaningful time period                    |                           |
| 43 |                |                                                 |                           |
| 44 |                |                                                 |                           |
| 45 |                |                                                 |                           |
| 46 |                |                                                 |                           |
| 47 |                |                                                 |                           |
| 48 |                |                                                 |                           |
| 49 | Other analyses | <a href="#">#17</a> Report other analyses done— | 9,10,11,13,17,30,31,32,33 |
| 50 |                | e.g., analyses of subgroups                     |                           |
| 51 |                | and interactions, and                           |                           |
| 52 |                | sensitivity analyses                            |                           |
| 53 |                |                                                 |                           |
| 54 |                |                                                 |                           |
| 55 |                |                                                 |                           |
| 56 |                |                                                 |                           |
| 57 |                |                                                 |                           |
| 58 |                |                                                 |                           |
| 59 |                |                                                 |                           |
| 60 |                |                                                 |                           |

## Discussion

- 1  
2  
3
- 4 Key results [#18](#) Summarise key results with 14,15,16  
5  
6 reference to study objectives  
7  
8  
9
- 10 Limitations [#19](#) Discuss limitations of the 17  
11  
12 study, taking into account  
13  
14 sources of potential bias or  
15  
16 imprecision. Discuss both  
17  
18 direction and magnitude of  
19  
20 any potential bias.  
21  
22  
23
- 24 Interpretation [#20](#) Give a cautious overall 14,15,16  
25  
26 interpretation considering  
27  
28 objectives, limitations,  
29  
30 multiplicity of analyses,  
31  
32 results from similar studies,  
33  
34 and other relevant evidence.  
35  
36  
37
- 38 Generalisability [#21](#) Discuss the generalisability 17  
39  
40 (external validity) of the study  
41  
42 results  
43  
44  
45
- 46 Other  
47  
48 Information  
49  
50
- 51 Funding [#22](#) Give the source of funding 18  
52  
53 and the role of the funders for  
54  
55 the present study and, if  
56  
57  
58  
59  
60

1 applicable, for the original  
2  
3 study on which the present  
4  
5 article is based  
6  
7

8 Notes:  
9

- 10  
11 • 14a: 9,10,11,12,13,25,26,27,28,29,30,31,32,33  
12  
13  
14 • 14b: 25,26,27,28  
15  
16  
17 • 15: 30,31,32,33  
18  
19  
20 • 17: 9,10,11,13,17,30,31,32,33 The STROBE checklist is distributed under the terms of the  
21 Creative Commons Attribution License CC-BY. This checklist was completed on 19. June 2020  
22 using <https://www.goodreports.org/>, a tool made by the [EQUATOR Network](#) in collaboration with  
23 [Penelope.ai](#)  
24  
25  
26  
27  
28  
29  
30  
31  
32  
33  
34  
35  
36  
37  
38  
39  
40  
41  
42  
43  
44  
45  
46  
47  
48  
49  
50  
51  
52  
53  
54  
55  
56  
57  
58  
59  
60

# BMJ Open

## Impact of the 2017 ACC/AHA guideline on the prevalence of elevated blood pressure and hypertension: a cross-sectional analysis of 10799 individuals.

|                                 |                                                                                                                                                                                                                                                                                                                                                                                                                                                                                                                                                                                                                                                           |
|---------------------------------|-----------------------------------------------------------------------------------------------------------------------------------------------------------------------------------------------------------------------------------------------------------------------------------------------------------------------------------------------------------------------------------------------------------------------------------------------------------------------------------------------------------------------------------------------------------------------------------------------------------------------------------------------------------|
| Journal:                        | <i>BMJ Open</i>                                                                                                                                                                                                                                                                                                                                                                                                                                                                                                                                                                                                                                           |
| Manuscript ID                   | bmjopen-2020-041973.R1                                                                                                                                                                                                                                                                                                                                                                                                                                                                                                                                                                                                                                    |
| Article Type:                   | Original research                                                                                                                                                                                                                                                                                                                                                                                                                                                                                                                                                                                                                                         |
| Date Submitted by the Author:   | 27-Oct-2020                                                                                                                                                                                                                                                                                                                                                                                                                                                                                                                                                                                                                                               |
| Complete List of Authors:       | Alyabsi, Mesnad; King Abdullah International Medical Research Center, Population Health Research Section; King Saud bin Abdulaziz University for Health Sciences, Gaid, Reham; Princess Noura Bint AbdulRahman University Alqunaiabet, Ada; King Abdullah International Medical Research Center Alaskar, Ahmed; King Abdullah International Medical Research Center; King Saud bin Abdulaziz University for Health Sciences Mahmud, Azra; King Abdulaziz Cardiac Center; King Abdullah International Medical Research Center Alghamdi, Jahad; King Abdullah International Medical Research Center; King Saud bin Abdulaziz University for Health Sciences |
| <b>Primary Subject Heading</b>: | Evidence based practice                                                                                                                                                                                                                                                                                                                                                                                                                                                                                                                                                                                                                                   |
| Secondary Subject Heading:      | Evidence based practice                                                                                                                                                                                                                                                                                                                                                                                                                                                                                                                                                                                                                                   |
| Keywords:                       | Hypertension < CARDIOLOGY, Protocols & guidelines < HEALTH SERVICES ADMINISTRATION & MANAGEMENT, EPIDEMIOLOGY                                                                                                                                                                                                                                                                                                                                                                                                                                                                                                                                             |
|                                 |                                                                                                                                                                                                                                                                                                                                                                                                                                                                                                                                                                                                                                                           |

SCHOLARONE™  
Manuscripts



I, the Submitting Author has the right to grant and does grant on behalf of all authors of the Work (as defined in the below author licence), an exclusive licence and/or a non-exclusive licence for contributions from authors who are: i) UK Crown employees; ii) where BMJ has agreed a CC-BY licence shall apply, and/or iii) in accordance with the terms applicable for US Federal Government officers or employees acting as part of their official duties; on a worldwide, perpetual, irrevocable, royalty-free basis to BMJ Publishing Group Ltd ("BMJ") its licensees and where the relevant Journal is co-owned by BMJ to the co-owners of the Journal, to publish the Work in this journal and any other BMJ products and to exploit all rights, as set out in our [licence](#).

The Submitting Author accepts and understands that any supply made under these terms is made by BMJ to the Submitting Author unless you are acting as an employee on behalf of your employer or a postgraduate student of an affiliated institution which is paying any applicable article publishing charge ("APC") for Open Access articles. Where the Submitting Author wishes to make the Work available on an Open Access basis (and intends to pay the relevant APC), the terms of reuse of such Open Access shall be governed by a Creative Commons licence – details of these licences and which [Creative Commons](#) licence will apply to this Work are set out in our licence referred to above.

Other than as permitted in any relevant BMJ Author's Self Archiving Policies, I confirm this Work has not been accepted for publication elsewhere, is not being considered for publication elsewhere and does not duplicate material already published. I confirm all authors consent to publication of this Work and authorise the granting of this licence.

# Impact of the 2017 ACC/AHA guideline on the prevalence of elevated blood pressure and hypertension: a cross-sectional analysis of 10799 individuals.

Mesnad Alyabsi<sup>1,2</sup>, Reham Gaid<sup>1,3</sup>, Ada Alqunaibet<sup>6</sup>, Ahmed Alaskar<sup>2,4,5</sup>, Azra Mahmud<sup>2,5,7</sup>, Jihad Alghamdi<sup>2,4,5</sup>

<sup>1</sup>Population Health Research Section, King Abdullah International Medical Research Center, Riyadh, Saudi Arabia; P.O. Box 22490, Riyadh 11426.

<sup>2</sup>King Saud bin Abdulaziz University for Health Sciences, Riyadh, Saudi Arabia; P.O. Box 22490, Riyadh 11426.

<sup>3</sup>Princess Nourah Bint Abdulrahman University, Health, and Rehabilitation Sciences College, Riyadh, Saudi Arabia; P.O. Box 84428, Riyadh 11671.

<sup>4</sup>The Saudi Biobank, King Abdullah International Medical Research Center (KAIMRC), Riyadh, Saudi Arabia.

<sup>5</sup>King Abdullah International Medical Research Center, Riyadh, Saudi Arabia; P.O. Box 22490, Riyadh 11426.

<sup>6</sup>Saudi Center for Disease Prevention and Control, Riyadh, Saudi Arabia.

<sup>7</sup>King Abdul Aziz Cardiac Center, King Abdul Aziz Medical City, MNGHA, Riyadh

**Corresponding author:** Mesnad Alyabsi, P.O. Box 3660, Riyadh 11481, Mail Code

1515, Saudi Arabia, Email: mesnadalyabsi@unomaha.edu, Tel: +966(11)429-4326,

FAX: +966(11) 429-4440

**Coauthors:** rehamgaid94@gmail.com; alghamdija@ngha.med.sa; ada\_mq@hotmail.com;

mahmudaz@ngha.med.sa; azramahmud@gmail.com

**(Word Count: 2500)**

## ABSTRACT

**Objectives** To assess the effect of the 2017 ACC/AHA hypertension guideline on the prevalence of elevated blood pressure and hypertension and the initiation of antihypertensive treatment and the blood pressure (BP) target goal in the Saudi population.

**Design** A cross-sectional study.

**Participants** A total of 10,799 adults ( $\geq 18$  years old) with three blood pressure readings during 2017-2020 from the Saudi Biobank (SBB) was used.

**Primary outcome** Hypertension was defined using three sources: the JNC-7 guideline (SBP $\geq 140$  or DBP $\geq 90$  mm Hg), the 2017 ACC/AHA guideline (SBP $\geq 130$  or DBP $\geq 80$  mm Hg), and a self-reported hypertension diagnosis.

**Results** The prevalence of hypertension, according to the JNC-7 guideline, was 14.49% (95% CI: 14.37, 14.61), and the 2017 ACC/AHA, 40.77% (95% CI: 40.60, 40.94), a difference of 26.28 %. Antihypertensive medication was recommended for 24.84% (95% CI: 24.69, 24.98) based on the JNC-7 guideline and for 27.67% (95% CI: 27.52, 27.82) using the 2017 ACC/AHA guideline. Lifestyle modification is recommended for 13.10% (95% CI: 12.47, 13.74) of patients with hypertension who are not recommended pharmacological intervention based on the 2017 ACC/AHA guideline. In patients prescribed antihypertensive, 49.56% (95% CI: 45.50, 53.64) and 27.81% (95% CI: 24.31, 31.59) presented with BP above treatment goal based on the 2017 ACC/AHA and JNC-7 guidelines, respectively. Using the two definitions, the risk factors are older age, male gender, diabetes diagnosis, increased body mass index (BMI), increased waist circumference, and waist-to-hip ratios.

**Conclusions** According to the 2017 ACC/AHA, the prevalence of hypertension has increased significantly, but a small increase in the percentage of patients recommended for antihypertensive treatment. A large percentage of patients with antihypertensive have BP above the targeted goal. Unless public health prevention efforts are adopted, the increased prevalence of elevated blood pressure and hypertension will increase cardiovascular diseases, a leading cause of mortality globally.

### Strengths and limitations of this study

- The study has a large sample size.
- We ascertained the hypertensive status using three BP measurements.
- The cross-sectional design limits our ability to assess the temporal relationship between our independent factors and hypertension.
- There was no ambulatory BP data for the participants.
- The study has limited geographic variation among study participants.

**Keywords:** Hypertension; guideline; Saudi Arabia; Prevention; Biobank; Blood pressure, Cardiovascular, Antihypertensive drugs



## INTRODUCTION

Hypertension is the most prevalent risk factor for cardiovascular diseases (CVDs) and the cause of more than 9.4 million annual preventable deaths globally<sup>1 2</sup>. The global number of patients with hypertension is expected to increase by 319.7 million between 2015 and 2050<sup>3</sup>. Risk factors that contribute to the increased prevalence of hypertension are increasing age, male gender, lifestyle factors such as smoking, alcohol consumption, unhealthy diet, sedentary lifestyle, and increased weight<sup>4</sup>. Though the burden of hypertension is substantial, detecting and controlling Blood Pressure (BP) levels at the elevated blood pressure stage will reduce the risk and burden of CVDs<sup>5</sup>.

Identifying the optimal BP levels for the definition of elevated blood pressure and hypertension has been controversial<sup>6-9</sup>. Based on evidence from Randomized Controlled Trials (RCTs) and other observational studies, the American College of Cardiology and the American Heart Association (ACC/AHA) developed the Hypertension Practice Guideline in 2017- "The ACC/AHA Guideline for the Prevention, Detection, Evaluation, and Management of High Blood Pressure in Adults"<sup>10</sup>. The guideline lowered the threshold categories of hypertension from  $\geq 140$  mmHg Systolic Blood Pressure (SBP) or  $\geq 90$  mmHg Diastolic Blood Pressure (DBP) to  $\geq 130$  mmHg SBP or  $\geq 80$  mmHg DBP. Elevated blood pressure is now limited to individuals with an SBP of 120-129 mmHg and DBP  $< 80$  mmHg instead of 120-139 mmHg or 80-89 mmHg suggested by the Joint National Committee 7 Blood Pressure Guideline (JNC-7)<sup>11</sup>. Although not endorsed by some organizations, the new lower BP categories have been assessed in a systematic review and meta-analysis and were associated with a lower risk of CVDs<sup>12</sup>.

1  
2  
3 Prior studies from various countries have investigated the prevalence of hypertension  
4 according to the 2017 ACC/AHA guideline<sup>13-18</sup>. Muntner and colleagues<sup>13</sup> evaluated the  
5 effects of the 2017 ACC/AHA guideline on the prevalence of hypertension, and they found  
6 an increase of 13.7% in their adult population. Likewise, Alkibria et al<sup>14 18</sup> assessed the  
7 changes in the prevalence of hypertension among the population of Nepal (ages  $\geq 15$ ) and  
8 Bangladesh (ages  $\geq 35$ ) and found an increase of 23% and 22.3%, respectively. Moreover,  
9 Khera et al<sup>15</sup> found an increase of 26.8% and 45.1% among the 45-75 years old population  
10 of China and the U.S., respectively. The estimation of hypertension would essentially  
11 update the burden of CVDs and shed light on the proportion of hypertensive patients  
12 recommended for lifestyle modifications or antihypertensive medication.  
13  
14  
15  
16  
17  
18  
19  
20  
21  
22  
23  
24  
25

26  
27 According to the latest survey in 2016, Saudi Arabia is a developing country with a total  
28 population of 31 million<sup>19</sup>. Half of the population are younger than 25, 35% between the  
29 ages of 20 and 39, and only 3.2% are over 64 years old<sup>19</sup>. Based on the JNC-7 guideline,  
30 the prevalences of hypertension and elevated blood pressure among the Saudi population  
31 were 15.2% and 40.6%, respectively<sup>20</sup>. Among patients on antihypertensive medication,  
32 between 55% and 73% reported BP above the targeted level by the JNC-7 guideline<sup>21 22</sup>.  
33  
34  
35  
36  
37  
38  
39  
40  
41

42 We designed the current study to investigate the impact of the 2017 ACC/AHA guideline  
43 on the prevalence of hypertension and to assess the percentage of hypertensive patients  
44 recommended for lifestyle modification or antihypertensive medication according to the  
45 2017 ACC/AHA guideline. We also aim to estimate the rate of patients prescribed  
46 antihypertensive medication with BP above the goal recommended by the 2017 ACC/AHA  
47 guideline. As a secondary analysis, we also aim to evaluate the determinants of elevated  
48 blood pressure and hypertension among the Saudi Biobank (SBB). The results will be  
49  
50  
51  
52  
53  
54  
55  
56  
57  
58  
59  
60

1  
2  
3 useful for public health officials and health care providers to plan and implement primary,  
4 secondary, and tertiary prevention interventions. These interventions reduce the burden of  
5 hypertension in addition to the morbidity and mortality associated with CVDs.  
6  
7

## 8 9 10 **MATERIALS AND METHODS**

### 11 12 **Data sources**

13  
14 The Institutional Review Board of King Abdullah International Medical Research Center  
15 (IRB#139 RC19/028/R) approved the study. The study has a cross-sectional design using  
16 data from the SBB. SBB is an ongoing project to investigate the current health behavior  
17 of the Saudi population. The project explores the fundamental mechanisms of diseases by  
18 combining bio-specimens and survey data, sociodemographic, and medical history  
19 information. The current study only used the survey data available from the survey part of  
20 the SBB.  
21  
22  
23  
24  
25  
26  
27  
28  
29

### 30 31 **Patient and Public Involvement**

32  
33 No patient involved.  
34  
35

### 36 37 **Survey development and administration**

38  
39 The SBB research team created a survey based on a previously developed and validated  
40 questionnaire. The questionnaire partly corresponds to other similar population biobank  
41 projects to allow comparability between the Saudi population and other populations. The  
42 preliminary survey questions were pilot tested, and the items were revised according to the  
43 findings. The questionnaire includes the following sections: Date and Location of  
44 Recruitment, Demographic Information, Family Information, Housing Information,  
45 General Health Status, Personal and Family Medical History, History of Personal and  
46  
47  
48  
49  
50  
51  
52  
53  
54  
55  
56  
57  
58  
59  
60

1  
2  
3 Family Medications Use, Disabilities, Others, Women and Men Health, Health Behaviors,  
4 Nutrition, Physical Activity, and Anthropometric Measurements.

5  
6  
7  
8 The questionnaire items are primarily closed-ended questions with Likert scale responses.

9  
10 The questionnaire is administered to participants by trained research coordinators. Before  
11 obtaining consent and completing the questionnaire, the coordinators describe the SBB  
12 objectives, the benefits of study participation, the security and privacy of collected  
13 information, voluntary participation, and the unconditional withdrawal from the study.  
14  
15  
16  
17  
18

### 19 20 **Study population and data extraction**

21  
22 The study population is adults ( $\geq 18$  years old) who participated in the survey from  
23 December 10th, 2017 to January 29th, 2020, with three recorded BP measurements. The  
24 data related to the prescribed antihypertensive medications were extracted from the  
25 electronic medical records.  
26  
27  
28  
29  
30  
31

### 32 33 **Measurement method for blood pressure**

34  
35 The BP was measured using a calibrated sphygmomanometer and arm cuffs (Omron 705it  
36 or Omron M3). Research coordinators are trained to measure BP once the participants are  
37 rested, with legs uncrossed. The average of the three BP measurements was computed and  
38 used as the final BP reading.  
39  
40  
41  
42  
43  
44

### 45 46 **Blood pressure classification**

47  
48 Using the JNC-7 guideline, BP was categorized into four categories: normal (SBP $<120$  and  
49 DBP $<80$  mmHg), elevated blood pressure (SBP=120-139, or DBP=80-89 mmHg), stage 1  
50 (SBP=140-159 or DBP=90-99 mmHg) and stage 2 (SBP $\geq 160$  or DBP $\geq 100$  mmHg)<sup>11</sup>.  
51  
52

53  
54  
55 Using the ACC/AHA guideline, BP was also categorized into four categories: normal  
56  
57  
58  
59

1  
2  
3 (SBP<120 and DBP<80 mmHg), elevated (SBP=120-129 and DBP<80 mmHg), stage 1  
4  
5 (SBP=130-139 or DBP=80-89 mmHg) and stage 2 (SBP≥140 or DBP≥90 mmHg)<sup>10</sup>.  
6  
7 Individuals with BP measurements in stage 1 or stage 2 were considered as diagnosed with  
8  
9 hypertension.  
10  
11

### 12 13 **Data collection and definitions**

14  
15  
16 The participants' sociodemographic information, including age, gender, marital status,  
17  
18 education level, occupation, and family income, was extracted from the SBB data. Also,  
19  
20 behavioral health factors such as physical activities, smoking status, including shisha use,  
21  
22 dietary intake, and comorbidities, were retrieved. The waist and hip circumferences, height,  
23  
24 and weight measurements were categorized as suggested by Lear et al. <sup>23</sup>. Comorbidities  
25  
26 such as a diagnosis of diabetes mellitus or any CVD were self-reported.  
27  
28  
29

### 30 31 **Prescription data**

32  
33 We used medical records and pharmacy data to identify participants with an  
34  
35 antihypertensive medication prescription. Based on the 2017 ACC/AHA guideline, we  
36  
37 defined guideline-recommended antihypertensive medication use as patients with  
38  
39 SBP/DBP of ≥140/90 mm Hg; for high-risk patients (i.e., DM, CVD, age ≥ 65), the cut off  
40  
41 was 130/80 mm Hg. The same applied to the JNC-7 guideline except that DM was the only  
42  
43 designation of high risk. We identified patients with a diagnosis of hypertension in their  
44  
45 medical file, self-reported hypertension, and at least one prescription of antihypertensive  
46  
47 medication were also identified<sup>24</sup>. The antihypertensive drugs used were beta-blockers,  
48  
49 calcium channel blockers, angiotensin-converting enzyme inhibitors, angiotensin receptor  
50  
51  
52  
53  
54  
55  
56  
57  
58  
59  
60

1  
2  
3 blockers, diuretics, and centrally or peripherally acting agents found in the pharmacy files  
4  
5 during the diagnosis year.  
6  
7

### 8 **Data analysis**

9

10 The data were analyzed using SAS statistical software version 9.4 (SAS Institute Inc. Cary,  
11 NC). Descriptive data for the sample, stratified by gender, are presented as frequency and  
12 percentage for categorical variables, and continuous variables are presented as a mean and  
13 standard deviation (SD). Also, for each BP category, the mean, SD, median, interquartile  
14 range (IQR), minimum, and maximum value was calculated. The prevalence of  
15 hypertension was calculated by dividing the total number of hypertensive individuals by  
16 the total number of the study population. The prevalence of elevated blood pressure was  
17 measured by dividing the total number of prehypertensive by the total number of the study  
18 population. The prevalence of hypertension and elevated blood pressure and the 95% CI  
19 were calculated using the Wald binomial method.  
20  
21  
22  
23  
24  
25  
26  
27  
28  
29  
30  
31  
32  
33

34 Missing covariates data were handled using the multiple imputations by chained equations  
35 (fully conditional method), assuming that data are missing at random (MAR). The missing  
36 data ranges from 0% to 30%, and 30 imputations were conducted. Given the arbitrary  
37 pattern of the missing data, the PROC MI procedure was used with the "FCS regpmm"  
38 statement for continuous variables and the "FCS logistic" for categorical variables<sup>25</sup>.  
39  
40  
41  
42  
43  
44  
45  
46 Univariate and multivariate logistic regressions were conducted using the multiple imputed  
47 data to estimate the odds ratio (OR) and the adjusted odds ratio (AOR). Backward  
48 elimination was used to determine variables included at the multivariate level. All  
49 statistical tests were 2-sided, and findings were considered statistically significant at  $P <$   
50  
51  
52  
53  
54  
55  
56  
57  
58  
59  
60

1  
2  
3 .05. STROBE cross-sectional guideline was used to assure that all essential elements are  
4 reported and covered<sup>26</sup>.  
5  
6

## 7 8 **RESULTS**

### 9 10 **Descriptive statistics**

11  
12 A total of 11571 individuals were captured in the SBB. After excluding individuals <18  
13 years old (n=327) and with less than three BP readings (n=445), the final sample was 10799  
14 individuals. The overall characteristics of the study sample stratified by antihypertensive  
15 prescriptions are summarized in Table 1 ( and Table S3 in the supplementary material).  
16  
17 Between the years 2017 and 2020, 41.22%, 15.26%, 24.84%, and 13.32% of the SBB  
18 participants not prescribed antihypertensive medication presented with SBP/DBP readings  
19 of <120/80 mm Hg, 120-129/<80 mm Hg, 130-139/80-89 mm Hg, and  $\geq$ 140/90 mm Hg,  
20 respectively. Participants with increased BP tend to be male, of older age, with a history of  
21 diabetes or CVD.  
22  
23  
24  
25  
26  
27  
28  
29  
30  
31  
32

### 33 34 **The prevalence of hypertension and the recommended interventions according to the** 35 **2017 ACC/AHA and JNC-7 Guidelines.**

36  
37 As shown in Table 2, the prevalence of HTN based on the 2017 ACC/AHA was 40.77%  
38 and on JNC-7 was 27.57%. The overall prevalence of HTN and across all patients'  
39 characteristics were both higher using the 2017 ACC/AHA guidelines compared with the  
40 JNC-7 guidelines, and the difference in the prevalence was highest among the oldest age  
41 group. While only 24.84% of patients were recommended antihypertensive medication  
42 based on the JNC-7 guideline, 27.67% were recommended medication according to the  
43 2017 ACC/AHA guideline. Except for males, there was an increase in the suggested use of  
44 antihypertensive medication across all patients' characteristics using the 2017 ACC/AHA  
45  
46  
47  
48  
49  
50  
51  
52  
53  
54  
55  
56  
57  
58  
59  
60

1  
2  
3 guideline. About 13.10% of hypertensive patients were recommended lifestyle  
4 modifications based on the 2017 ACC/AHA guideline. Finally, an additional 2.83% of  
5 hypertensive patients were recommended antihypertensive intervention based on the 2017  
6 ACC/AHA guideline.  
7  
8  
9

10  
11  
12 Hypertensive patients based on the 2017 ACC/AHA guideline and not the JNC-7 guideline,  
13 compared with those meeting the definition of hypertension based on the JNC-7 guideline,  
14 were younger, have lower BMI, better waist circumference profile, lower SBP, and DBP.  
15  
16  
17  
18  
19 (Table 3). When compared with individuals recommended treatment by JNC-7 guideline,  
20 individuals recommended for antihypertensive medication according to the 2017  
21 ACC/AHA guideline but not JNC-7 guideline were younger, less likely to be diabetic, had  
22 lower SBP and DBP, but more likely to have CVD history.  
23  
24  
25  
26  
27

### 28 **BP levels above the targeted goals by the 2017 ACC/AHA and JNC-7 Guidelines.**

29  
30  
31 The percentage of patients prescribed antihypertensive medication and presented with  
32 above-goal BP according to the 2017 ACC/AHA, and JNC-7 guidelines were 49.57% and  
33 27.80%, respectively (Table 4). Overall, patients with BP above goal according to the 2017  
34 ACC/AHA guideline but not JNC-7 guideline were younger, less likely to be diabetic, with  
35 lower SBP and DBP, and 52.31% were taking one class antihypertensive medication.  
36  
37  
38  
39  
40  
41

### 42 **Determinants of hypertension and elevated blood pressure**

43  
44  
45 Hypertension determinants, according to the ACC/AHA and JNC-7 guidelines, are  
46 presented in Table S1 in the supplementary material (adjusted for all variables shown in  
47 the tables). According to the ACC/AHA guideline, the determinants of hypertension were  
48 increasing age, male gender, being a student or unemployed, having diabetes, increasing  
49 BMI, particularly with abdominal adiposity. Moreover, determinants of hypertension based  
50  
51  
52  
53  
54  
55  
56  
57  
58  
59  
60



1  
2  
3 on the JNC-7 guideline were increasing age, male gender, employment status, time spent  
4 standing while at work, diabetes, and increasing BMI, mostly central obesity.

5  
6  
7 The predictors of elevated blood pressure, adjusted for all covariates in the table, are  
8 presented in Table S2 (supplementary material). Elevated BP determinants were being  
9 male, younger age, sitting at work a few times, sometimes or most of the time, and  
10 increased BMI.  
11

## 12 **DISCUSSION**

13  
14  
15 The current study assessed the impact of the 2017 ACC/AHA guideline definition of  
16 hypertension, the recommendation for initiation of lifestyle modifications and  
17 antihypertensive medication, and the BP goals of antihypertensive use among Saudi adults.  
18

19 While there will be a substantial increase in the prevalence of hypertension (26.28%), a  
20 small increase in the percentage of adults recommended antihypertensive medication  
21 (2.83%) according to the 2017 ACC/AHA guideline. The increase in the prevalence of  
22 hypertension translates into an increase from 1.8 million hypertensive adults into 5.1  
23 million adults according to the latest census estimates of Saudis  $\geq 18$  years old<sup>19</sup>. The  
24 increase is predominantly observed in men (47.72%) vs. women (33.57%), in individuals  
25  $\geq 60$  years old (70.13%), diabetics (62.37%), and individuals who are obese (56.12%).  
26  
27  
28  
29  
30  
31  
32  
33  
34  
35  
36  
37  
38  
39  
40  
41

42 Our findings of the prevalence of hypertension appear to complement other research from  
43 Bangladesh<sup>16,27</sup>, Nepal<sup>14</sup>, and to a lesser extent, the U.S.<sup>13,17</sup>, which assessed the impact of  
44 the 2017 ACC/AHA guidelines on the prevalence of hypertension. In the U.S. study,  
45 Muntner et al<sup>13</sup> used the National Health and Nutrition Examination Survey and found an  
46 increase of 13.7% in the prevalence of hypertension. On the other hand, the findings from  
47 Nepal and Bangladesh, an increase in the prevalence of hypertension of 23% and 22%  
48  
49  
50  
51  
52  
53  
54  
55  
56  
57  
58  
59  
60

1  
2  
3 respectively, were comparable to our results; 26.28%. The findings might reflect the  
4  
5 younger population of Nepal, Bangladesh, and Saudi Arabia compared to the U.S.  
6  
7 population<sup>19 28 29</sup>.

8  
9  
10 According to the 2017 ACC/AHA guideline, we also found that 13.10% of the Saudi  
11  
12 hypertensive patients will require lifestyle modifications without antihypertensive  
13  
14 intervention, a finding similar to the U.S. study by Muntner<sup>13</sup>. Examples of recommended  
15  
16 lifestyle modifications include practicing a healthy lifestyle such as eating a healthy diet,  
17  
18 maintaining a healthy weight, avoiding smoking, and being physically active. These non-  
19  
20 pharmacological interventions have been endorsed by the 2017 ACC/AHA guideline based  
21  
22 on several observational and randomized controlled trials<sup>30</sup>. For instance, in normotensive  
23  
24 individuals, engaging in physical activities of 90-150 minutes/week is associated with a  
25  
26 reduction of 2-4 mmHg in systolic BP<sup>31</sup>. Although it is unfortunate that most of our  
27  
28 population (70.70%), especially women (84.25%), reported never being engaged in any  
29  
30 moderate exercise, governmental efforts through the Quality of Life program are ongoing  
31  
32 to promote physical activities. Future studies should assess the impact of these programs  
33  
34 on the incidence of hypertension.

35  
36  
37 Moreover, we found 46.56% of patients taking antihypertensive medication presented with  
38  
39 a BP above the target goal suggested by the 2017 ACC/AHA guideline. Our result is  
40  
41 congruent with studies from the U.S. and Bangladesh, where the percentages of patients  
42  
43 with BP above the target goal were 53.4% and 61%, respectively<sup>13 16</sup>. It is also similar to  
44  
45 a study from Saudi Arabia, which found that 55% had BP above target<sup>21</sup>. Nonetheless, it  
46  
47 is unclear whether uncontrolled hypertension is due to patient factors such as lack of  
48  
49 medication adherence or the providers' inability to titrate antihypertensive treatment when  
50  
51  
52  
53  
54  
55  
56  
57  
58  
59  
60

1  
2  
3 the BP is suboptimal. A multidisciplinary disease management strategy and follow-up of  
4 patients with uncontrolled BP should be emphasized. To achieve the targeted BP goal  
5 among patients with uncontrolled BP, intensive antihypertensive treatment is also needed.  
6  
7  
8  
9

## 10 11 **STRENGTHS AND LIMITATION**

12  
13 Our study has several strengths. Firstly, we used a large sample of the Saudi population  
14 (n=10799) from diverse backgrounds (e.g., wives, professionals, students, and unemployed  
15 women). Secondly, we ascertained the hypertensive status using BP measurements  
16 according to a standardized procedure. Our study also has several limitations. Firstly, the  
17 study is limited to the capital of Saudi Arabia, Riyadh. However, given the characteristics  
18 of the participants, we believe that the geographic location is unlikely to affect the external  
19 validity of our findings. Secondly, although BP was measured using three readings, the  
20 measurement was performed during a single visit. Thirdly, we relied on the medical and  
21 pharmacy files to identify users of antihypertensive medications, and we may have missed  
22 some patients who were not identified with this approach. Fourthly, we do not have  
23 ambulatory BP data for the participants, which may overestimate some individuals who  
24 may have white coat hypertension; however, the prevalence of white coat hypertension is  
25 approximately 3% in a Saudi cohort, which is too small to affect the prevalence data.  
26  
27  
28  
29  
30  
31  
32  
33  
34  
35  
36  
37  
38  
39  
40  
41  
42

## 43 **CONCLUSION**

44  
45 The 2017 ACC/AHA guideline resulted in an alarming increase in the prevalence of  
46 hypertension and elevated blood pressure, with implications for escalating healthcare costs.  
47  
48 There is, however, a small increase in the percentage of patients recommended  
49 antihypertensive medication. About 49.56% of patients prescribed antihypertensive  
50 medication have BP above the target goal set by the 2017 ACC/AHA guideline. Unless  
51  
52  
53  
54  
55  
56  
57  
58  
59  
60

1  
2  
3 strong public health measures are adopted, including implementing lifestyle changes at a  
4  
5 population level in conjunction with the aggressive management of hypertension, we are  
6  
7 likely to see an upward trend in the prevalence of hypertension and associated  
8  
9 cardiovascular morbidity and mortality.  
10  
11

## 12 13 **ACKNOWLEDGEMENTS**

14  
15  
16 The authors would like to thank Dr. Mostafa Abolfotouh, Dr. Mohamed Hussein, Dr.  
17  
18 Barrak Alsomaie, and Mr. Abdullah Alturki for their dedication and efforts in  
19  
20 establishing and supporting the Saudi Biobank. We would also like to thank all members  
21  
22 of the Saudi Biobank team.  
23  
24

## 25 26 **FUNDING STATEMENT:**

27  
28  
29 None.  
30  
31

## 32 33 **DATA ACCESS STATEMENT**

34  
35 Data not available due containing sensitive information that might expose the subject's  
36  
37 identity.  
38  
39

## 40 41 **CONTRIBUTION STATEMENT**

42  
43 MA designed the study, conducted the analyses, and wrote the manuscript. RG collected  
44  
45 data, conducted analyses, and drafted manuscript. Jahad A., Ada A., Ahmed A., and AM  
46  
47 helped with the study design and assisted with the manuscript preparation. All authors  
48  
49 helped with manuscript revisions and ensured its intellectual content. Jahad A. helped with  
50  
51 data acquisition. All authors have read and approved the final manuscript. All authors  
52  
53 agreed to be accountable for all aspects of the work.  
54  
55  
56  
57  
58  
59  
60

1  
2  
3  
4  
5  
6  
7  
8  
9  
10  
11  
12  
13  
14  
15  
16  
17  
18  
19  
20  
21  
22  
23  
24  
25  
26  
27  
28  
29  
30  
31  
32  
33  
34  
35  
36  
37  
38  
39  
40  
41  
42  
43  
44  
45  
46  
47  
48  
49  
50  
51  
52  
53  
54  
55  
56  
57  
58  
59  
60

**CONFLICT OF INTEREST**

The authors declare that they have no competing interests.

For peer review only

**REFERENCE:**

1. Zhou D, Xi B, Zhao M, et al. Uncontrolled hypertension increases risk of all-cause and cardiovascular disease mortality in US adults: the NHANES III Linked Mortality Study. *Scientific reports* 2018;8(1):1-7.
2. Chan M. A global brief on Hypertension. *World Health Organization Switzerland* 2013
3. Sudharsanan N, Geldsetzer P. Impact of Coming Demographic Changes on the Number of Adults in Need of Care for Hypertension in Brazil, China, India, Indonesia, Mexico, and South Africa: A Modeling Study. *Hypertension* 2019;73(4):770-76.
4. Lackland DT, Weber MA. Global burden of cardiovascular disease and stroke: hypertension at the core. *Canadian Journal of Cardiology* 2015;31(5):569-71.
5. Han M, Li Q, Liu L, et al. Prehypertension and risk of cardiovascular diseases: a meta-analysis of 47 cohort studies. *Journal of Hypertension* 2019;37(12):2325-32.
6. Bolli P, Hemmelgarn B, Myers MG, et al. High normal blood pressure and prehypertension: The debate continues. *Canadian Journal of Cardiology* 2007;23(7):581-83.
7. Banach M, Michalska M, Kjeldsen SE, et al. What should be the optimal levels of blood pressure: does the J-curve phenomenon really exist? *Expert opinion on pharmacotherapy* 2011;12(12):1835-44.
8. Fan F, Yuan Z, Qin X, et al. Optimal systolic blood pressure levels for primary prevention of stroke in general hypertensive adults: findings from the CSPPT (China Stroke Primary Prevention Trial). *Hypertension* 2017;69(4):697-704.
9. Deedwania P. The ongoing saga of optimal blood pressure level in patients with diabetes mellitus and coronary artery disease: Am Heart Assoc, 2018.
10. Whelton PK, Carey RM, Aronow WS, et al. 2017 ACC/AHA/AAPA/ABC/ACPM/AGS/APhA/ASH/ASPC/NMA/PCNA guideline for the prevention, detection, evaluation, and management of high blood pressure in adults: a report of the American College of Cardiology/American Heart Association Task Force on Clinical Practice Guidelines. *Journal of the American College of Cardiology* 2018;71(19):e127-e248.
11. Chobanian AV. National High blood pressure education program committee: seventh report of the Joint National Committee on Prevention, Detection, Evaluation, and Treatment of High Blood Pressure. *Hypertension* 2003;42:1206-52.
12. Reboussin DM, Allen NB, Griswold ME, et al. Systematic review for the 2017 ACC/AHA/AAPA/ABC/ACPM/AGS/APhA/ASH/ASPC/NMA/PCNA guideline for the prevention, detection, evaluation, and management of high blood pressure in adults: a report of the American College of Cardiology/American Heart Association Task Force on Clinical Practice Guidelines. *Journal of the American College of Cardiology* 2018;71(19):2176-98.
13. Muntner P, Carey RM, Gidding S, et al. Potential US population impact of the 2017 ACC/AHA high blood pressure guideline. *Journal of the American College of Cardiology* 2018;71(2):109-18.
14. Al Kibria GM, Swasey K, Angela K, et al. Estimated change in prevalence of hypertension in Nepal following application of the 2017 ACC/AHA guideline. *JAMA Network Open* 2018;1(3):e180606-e06.
15. Khera R, Lu Y, Saxena A, et al. The impact of 2017 ACC/AHA guidelines on the prevalence of hypertension and eligibility for anti-hypertensive therapy in the United States and China. *bioRxiv* 2017:218859.

16. Islam JY, Zaman MM, Haq SA, et al. Epidemiology of hypertension among Bangladeshi adults using the 2017 ACC/AHA hypertension clinical practice guidelines and joint National Committee 7 guidelines. *Journal of human hypertension* 2018;32(10):668-80.
17. Wang D, Hatahet M, Wang Y, et al. Multivariate analysis of hypertension in general US adults based on the 2017 ACC/AHA guideline: data from the national health and nutrition examination survey 1999 to 2016. *Blood pressure* 2019;28(3):191-98.
18. Al Kibria GM, Swasey K, Choudhury A, et al. The new 2017 ACC/AHA guideline for classification of hypertension: changes in prevalence of hypertension among adults in Bangladesh. *Journal of human hypertension* 2018;32(8):608-16.
19. General Authority for Statistics. Demographic Survey 2016 [cited 2020. Available from: [https://www.stats.gov.sa/sites/default/files/en-demographic-research-2016\\_2.pdf](https://www.stats.gov.sa/sites/default/files/en-demographic-research-2016_2.pdf)2020.
20. El Bcheraoui C, Basulaiman M, Wilson S, et al. Breast cancer screening in Saudi Arabia: free but almost no takers. *Plos one* 2015;10(3):e0119051.
21. El Bcheraoui C, Memish ZA, Tuffaha M, et al. Hypertension and its associated risk factors in the Kingdom of Saudi Arabia, 2013: a national survey. *International journal of hypertension* 2014;2014
22. Yusufali AM, Khatib R, Islam S, et al. Prevalence, awareness, treatment and control of hypertension in four Middle East countries. *Journal of hypertension* 2017;35(7):1457-64.
23. Lear S, James P, Ko G, et al. Appropriateness of waist circumference and waist-to-hip ratio cutoffs for different ethnic groups. *European journal of clinical nutrition* 2010;64(1):42-61.
24. Bullano MF, Kamat S, Willey VJ, et al. Agreement between administrative claims and the medical record in identifying patients with a diagnosis of hypertension. *Medical care* 2006:486-90.
25. Smith C, Kosten S. Multiple Imputation: A Statistical Programming Story 2017 [Available from: <https://www.pharmasug.org/proceedings/2017/SP/PharmaSUG-2017-SP01.pdf>.
26. Von Elm E, Altman DG, Egger M, et al. The Strengthening the Reporting of Observational Studies in Epidemiology (STROBE) statement: guidelines for reporting observational studies. *Annals of internal medicine* 2007;147(8):573-77.
27. Khanam R, Ahmed S, Rahman S, et al. Prevalence and factors associated with hypertension among adults in rural Sylhet district of Bangladesh: a cross-sectional study. *BMJ open* 2019;9(10)
28. Samir K. An age distribution story: Reading into the population pyramid of Nepal. *Asian Population Studies* 2014;10(2):121-24.
29. Kabir R, Khan HT, Kabir M, et al. Population ageing in Bangladesh and its implication on health care. *European Scientific Journal* 2013;9(33):34-47.
30. Arnett DK, Blumenthal RS, Albert MA, et al. 2019 ACC/AHA guideline on the primary prevention of cardiovascular disease: a report of the American College of Cardiology/American Heart Association Task Force on Clinical Practice Guidelines. *Journal of the American College of Cardiology* 2019;74(10):e177-e232.
31. Stefani L, Mascherini G, Tosi B, et al. Hypertension today: Role of sports and exercise medicine. *Journal of Hypertension and Cardiology* 2019;2(4):20.

**Table 1. Characteristics of Saudi Biobank by BP levels and antihypertensive use, 2017-2020**

|                                  | SBP/DBP categories among those not taking antihypertensive medications (mm Hg) |                      |                        |                  | Antihypertensive recorded (n=579) |
|----------------------------------|--------------------------------------------------------------------------------|----------------------|------------------------|------------------|-----------------------------------|
|                                  | <120/80 (n=4451)                                                               | 120-129/<80 (n=1648) | 130-139/80-89 (n=2683) | ≥140/90 (n=1438) |                                   |
| <b>Age, years</b><br>Mean (SD)   | 28.50 (7.44)                                                                   | 28.72 (8.25)         | 30.58 (9.06)           | 33.27 (10.73)    | 35.38 (9.92)                      |
| <b>Age, years</b><br>N (%)       |                                                                                |                      |                        |                  |                                   |
| 18-29                            | 2806 (63.04)                                                                   | 1053 (63.90)         | 1432 (53.37)           | 631 (43.88)      | 188 (32.47)                       |
| 30-39                            | 1257 (28.24)                                                                   | 417 (25.30)          | 851 (31.72)            | 418 (29.07)      | 197 (34.02)                       |
| 40-49                            | 318 (7.14)                                                                     | 136 (8.25)           | 288 (10.73)            | 263 (18.29)      | 141 (24.35)                       |
| 50-59                            | 61 (1.37)                                                                      | 36 (2.18)            | 86 (3.21)              | 101 (7.02)       | 42 (7.25)                         |
| ≥60                              | 9 (0.20)                                                                       | 6 (0.36)             | 26 (0.97)              | 25 (1.74)        | 11 (1.90)                         |
| <b>Gender,</b><br>N (%)          |                                                                                |                      |                        |                  |                                   |
| Female                           | 2587 (58.12)                                                                   | 706 (42.84)          | 1127 (42.01)           | 485 (33.73)      | 397 (68.57)                       |
| Male                             | 1864 (41.88)                                                                   | 942 (57.16)          | 1556 (57.99)           | 953 (66.27)      | 182 (31.43)                       |
| <b>Tobacco use,</b><br>N (%)     |                                                                                |                      |                        |                  |                                   |
| No                               | 3604 (83.19)                                                                   | 1331 (81.96)         | 2192 (83.35)           | 1158 (82.07)     | 526 (92.28)                       |
| Yes                              | 728 (16.81)                                                                    | 293 (18.04)          | 438 (16.65)            | 253 (17.93)      | 44 (7.72)                         |
| <b>Diabetes history, N (%)</b>   |                                                                                |                      |                        |                  |                                   |
| No                               | 2777 (62.39)                                                                   | 1010 (61.28)         | 1622 (60.45)           | 861 (59.87)      | 349 (60.28)                       |
| Yes                              | 1674 (37.61)                                                                   | 638 (38.71)          | 1061 (39.55)           | 577 (40.13)      | 230 (39.72)                       |
| <b>CVD history,</b><br>N (%)     |                                                                                |                      |                        |                  |                                   |
| No                               | 3657 (82.16)                                                                   | 1347 (81.74)         | 2145 (79.95)           | 1120 (77.89)     | 439 (75.82)                       |
| Yes                              | 794 (17.84)                                                                    | 301 (18.26)          | 538 (20.05)            | 318 (22.11)      | 140 (24.18)                       |
| <b>Blood pressure, Mean (SD)</b> |                                                                                |                      |                        |                  |                                   |
| Systolic blood pressure          | 108.47 (7.70)                                                                  | 124.01 (2.81)        | 126.55 (9.0)           | 143.81 (20.88)   | 123.40 (18.01)                    |
| Diastolic blood pressure         | 67.98 (6.68)                                                                   | 71.47 (5.71)         | 80.92 (5.88)           | 90.49 (13.17)    | 78.95 (15.45)                     |



**Table 2. The percentage of hypertension and the recommended antihypertensive medications in the Saudi Biobank according to the 2017 ACC/AHA Guideline and the JNC 7 Guideline**

| Characteristics       | 2017 ACC/AHA Guideline |                                          | JNC7 Guideline      |                                          | 2017 ACC/AHA but not JNC-7 |                                          |
|-----------------------|------------------------|------------------------------------------|---------------------|------------------------------------------|----------------------------|------------------------------------------|
|                       | HTN                    | Recommended Antihypertensive Medications | HTN                 | Recommended Antihypertensive Medications | HTN                        | Recommended Antihypertensive Medications |
|                       | % (95% CI)             | % (95% CI)                               | % (95% CI)          | % (95% CI)                               | % (95% CI)                 | % (95% CI)                               |
| Overall               | 40.77 (40.60,40.94)    | 27.67 (27.52,27.82)                      | 14.49 (14.37,14.61) | 24.84 (24.69,24.98)                      | 26.28 (26.23,26.33)        | 2.83 (2.83,2.84)                         |
| <b>Gender</b>         |                        |                                          |                     |                                          |                            |                                          |
| Women                 | 33.57 (33.34,33.80)    | 32.02 (31.79,32.24)                      | 10.39 (10.24,10.54) | 19.97 (19.78,20.17)                      | 23.18 (23.10,23.26)        | 12.05 (12.01,12.07)                      |
| Men                   | 47.72 (47.48,47.96)    | 23.16 (22.95,23.37)                      | 18.45 (18.26,18.63) | 29.53 (29.31,29.75)                      | 29.27 (29.22,29.33)        | -6.37 (-6.36,-6.38)                      |
| <b>Age, years</b>     |                        |                                          |                     |                                          |                            |                                          |
| 18-29                 | 34.86 (34.64,35.08)    | 21.62 (21.43,21.81)                      | 10.67 (10.53,10.81) | 19.66 (19.47,19.84)                      | 24.19 (24.11,24.27)        | 1.96 (1.96,1.97)                         |
| 30-39                 | 43.44 (43.12,43.76)    | 29.68 (29.39,29.97)                      | 14.62 (14.40,14.85) | 26.46 (26.18,26.75)                      | 28.82 (28.72,28.91)        | 3.22 (3.21,3.22)                         |
| 40-49                 | 55.58 (55.06,56.11)    | 44.15 (43.63,44.68)                      | 27.33 (26.87,27.80) | 39.35 (38.84,39.87)                      | 28.25 (28.19,28.31)        | 4.80 (4.79,4.81)                         |
| 50-59                 | 66.87 (65.94,67.80)    | 54.91 (53.92,55.89)                      | 36.31 (35.39,37.22) | 48.16 (47.17,49.15)                      | 30.56 (30.55,30.58)        | 6.75 (6.75,6.74)                         |
| ≥60                   | 70.13 (68.23,71.96)    | 64.94 (62.97,66.85)                      | 34.15 (32.27,36.02) | 54.55 (52.51,56.57)                      | 35.98 (35.96,35.94)        | 10.39 (10.46,10.28)                      |
| <b>Marital status</b> |                        |                                          |                     |                                          |                            |                                          |
| Never married         | 36.18 (35.95,36.40)    | 22.89 (22.70,23.09)                      | 11.91 (11.76,12.06) | 21.05 (20.86,21.24)                      | 24.27 (24.19,24.34)        | 1.84 (1.84,1.85)                         |
| Married               | 46.39 (46.13,46.65)    | 33.37 (33.12,33.62)                      | 17.76 (17.59,17.99) | 29.39 (29.15,29.63)                      | 28.63 (28.54,28.66)        | 3.98 (3.97,3.99)                         |
| Divorced, Sep.        | 44.18 (44.10,46.25)    | 34.61 (33.58,35.65)                      | 17.30 (16.50,18.10) | 29.83 (28.84,30.82)                      | 26.88 (27.6,28.15)         | 4.78 (4.74,4.83)                         |
| <b>Education</b>      |                        |                                          |                     |                                          |                            |                                          |
| < Primary school      | 58.75 (57.13,60.35)    | 44.36 (42.74,45.98)                      | 28.44 (26.97,29.92) | 40.19 (38.59,41.80)                      | 30.31 (30.16,30.43)        | 4.17 (4.15,4.18)                         |
| Intermediate school   | 50.43 (49.50,51.35)    | 37.17 (36.28,38.07)                      | 22.52 (21.75,23.29) | 33.97 (33.10,34.85)                      | 27.91 (27.75,28.06)        | 3.20 (3.18, 3.22)                        |
| Primary school        | 59.72 (58.58,60.86)    | 45.35 (44.19,46.51)                      | 30.07 (29.01,31.14) | 40.69 (39.55,41.84)                      | 29.65 (29.57,29.72)        | 4.66 (4.64,4.67)                         |
| High school           | 38.04 (37.79,38.30)    | 25.30 (25.07,25.53)                      | 13.45 (13.27,13.63) | 22.86 (22.64,23.08)                      | 24.59 (24.52,24.67)        | 2.44 (2.43,2.45)                         |
| Some college          | 48.19 (47.54,48.84)    | 34.43 (33.82,35.05)                      | 18.68 (18.18,19.19) | 31.16 (30.56,31.76)                      | 29.51 (29.36,29.65)        | 3.27 (3.26,3.29)                         |
| Bachelor              | 40.05 (39.78,40.31)    | 26.52 (26.28,26.76)                      | 12.90 (12.71,13.08) | 23.59 (23.36,23.82)                      | 27.15 (27.07,27.23)        | 2.93 (2.92,2.94)                         |
| Higher education      | 40.08 (39.14,41.02)    | 30.44 (29.55,31.32)                      | 15.02 (14.33,15.72) | 26.67 (25.82,27.52)                      | 25.06 (24.81,25.3)         | 3.77 (3.73,3.8)                          |
| <b>Employment</b>     |                        |                                          |                     |                                          |                            |                                          |
| Employed              | 41.70 (41.46,41.94)    | 28.55 (28.33,28.76)                      | 15.02 (14.84,15.19) | 25.56 (25.35,25.77)                      | 26.68 (26.62,26.75)        | 1.65 (2.98,2.99)                         |
| Unemployed            | 38.36 (37.80,38.92)    | 27.51 (27.00,28.03)                      | 13.54 (13.14,13.93) | 24.52 (24.03,25.02)                      | 24.82 (24.66,24.99)        | 2.99 (2.97,3.01)                         |
| Student               | 37.33 (37.01,37.65)    | 22.95 (22.67,23.23)                      | 11.72 (11.50,11.93) | 20.92 (20.66,21.19)                      | 25.61 (25.51,25.72)        | 2.03 (2.01,2.04)                         |
| Retired/others        | 46.44 (45.94,46.93)    | 34.75 (34.28,35.23)                      | 19.26 (18.87,19.65) | 30.87 (30.41,31.33)                      | 27.18 (27.07,27.28)        | 3.88 (3.87,3.90)                         |
| <b>Income, SAR</b>    |                        |                                          |                     |                                          |                            |                                          |
| ≤5000                 | 38.86 (38.62,39.10)    | 25.85 (25.63,26.06)                      | 13.43 (13.26,13.59) | 23.32 (23.12,23.53)                      | 25.43 (25.36,25.51)        | 2.53 (2.51,2.53)                         |
| 5001 - 10,000         | 38.46 (38.15,38.76)    | 25.20 (24.92,25.47)                      | 12.87 (12.66,13.08) | 22.67 (22.41,22.94)                      | 25.59 (25.49,25.68)        | 2.53 (2.51,2.53)                         |
| 1,0001 - 15,000       | 47.95 (47.45,48.44)    | 34.82 (34.35,35.28)                      | 18.40 (18.02,18.97) | 30.63 (30.18,31.09)                      | 29.55 (29.43,29.47)        | 4.19 (4.17,4.19)                         |
| 15,001 – 20,000       | 50.89 (50.12,51.66)    | 37.79 (37.04,38.53)                      | 20.68 (20.06,21.30) | 34.22 (33.49,34.95)                      | 30.21 (30.06,30.36)        | 3.57 (3.55,3.58)                         |

1  
2  
3  
4  
5  
6  
7  
8  
9  
10  
11  
12  
13  
14  
15  
16  
17  
18  
19  
20  
21  
22  
23  
24  
25  
26  
27  
28  
29  
30  
31  
32  
33  
34  
35  
36  
37  
38  
39  
40  
41  
42  
43  
44  
45  
46  
47

|                              |                     |                     |                     |                     |                     |                  |
|------------------------------|---------------------|---------------------|---------------------|---------------------|---------------------|------------------|
| >20,000                      | 50.26 (49.22,51.30) | 37.19 (36.19,38.19) | 22.77 (21.90,23.64) | 32.12 (31.76,33.69) | 27.49 (27.32,27.66) | 5.07 (4.43,4.50) |
| <b>Vigorous exercise</b>     |                     |                     |                     |                     |                     |                  |
| Never                        | 42.84 (42.63,43.04) | 30.08 (29.90,30.27) | 15.79 (15.64,15.94) | 26.89 (26.71,27.07) | 27.05 (26.99,27.10) | 3.19 (3.19,3.20) |
| 1                            | 38.95 (38.31,39.58) | 23.34 (22.80,23.89) | 13.67 (13.23,14.12) | 20.53 (20.01,21.06) | 25.28 (25.08,25.46) | 2.81 (2.79,2.83) |
| 2-3                          | 35.29 (34.74,35.84) | 21.08 (20.62,21.55) | 11.15 (10.79,11.52) | 19.62 (19.16,20.08) | 24.14 (23.95,24.32) | 1.46 (1.46,1.47) |
| 4-5                          | 33.65 (33.04,34.26) | 20.98 (20.45,21.51) | 10.01 (9.62,10.40)  | 19.64 (19.13,20.16) | 23.64 (23.42,23.86) | 1.34 (1.32,1.35) |
| >5                           | 34.00 (33.29,34.72) | 20.73 (20.12,21.34) | 9.64 (9.19,10.08)   | 18.40 (17.81,18.98) | 24.36 (24.10,24.64) | 2.33 (2.31,2.36) |
| <b>Current smoker</b>        |                     |                     |                     |                     |                     |                  |
| No                           | 40.93 (40.75,41.12) | 27.81 (27.64,27.97) | 14.47 (14.34,14.60) | 24.94 (24.78,25.10) | 26.46 (26.41,26.52) | 2.87 (2.86,2.87) |
| Yes                          | 39.98 (39.57,40.39) | 27.00 (26.63,27.37) | 14.60 (14.30,14.89) | 24.32 (23.96,24.68) | 25.38 (25.27,25.50) | 2.68 (2.67,2.69) |
| <b>Diabetes</b>              |                     |                     |                     |                     |                     |                  |
| No                           | 39.37 (39.20,39.54) | 18.87 (18.70,19.04) | 13.44 (13.32,13.56) | 14.25 (14.09,14.40) | 25.39 (25.88,25.98) | 4.62 (4.61,4.64) |
| Yes                          | 62.37 (61.69,63.04) | 41.60 (41.33,41.88) | 30.65 (30.01,31.30) | 41.60 (41.33,41.88) | 31.72 (31.68,31.74) | 0                |
| <b>BMI, kg/m<sup>2</sup></b> |                     |                     |                     |                     |                     |                  |
| Underweight                  | 20.84 (20.28,21.39) | 11.72 (11.28,12.17) | 5.41 (5.10,5.72)    | 10.55 (10.13,10.97) | 15.43 (15.18,15.67) | 1.17 (1.15,1.20) |
| Normal weight                | 30.76 (30.51,31.02) | 19.14 (18.92,19.36) | 8.89 (8.73,9.04)    | 16.98 (16.77,17.19) | 21.87 (21.78,21.98) | 2.16 (2.15,2.17) |
| Overweight                   | 44.37 (44.06,44.68) | 30.40 (30.12,30.69) | 14.69 (14.47,14.92) | 27.16 (26.88,27.44) | 29.68 (29.59,29.76) | 3.24 (3.24,3.25) |
| Obese                        | 56.12 (55.76,56.48) | 40.46 (40.10,40.82) | 23.98 (23.67,24.29) | 36.63 (36.27,36.98) | 32.14 (32.09,32.19) | 3.83 (3.83,3.84) |
| Extremely Obese              | 67.53 (66.53,68.54) | 54.21 (53.14,55.28) | 37.82 (36.78,38.87) | 50.46 (49.38,51.53) | 29.71 (29.75,29.67) | 3.75 (3.76,3.75) |
| <b>Waist Circum., cm</b>     |                     |                     |                     |                     |                     |                  |
| Normal                       | 32.65 (32.44,32.85) | 20.51 (20.34,20.68) | 9.30 (9.17,9.42)    | 18.13 (17.96,18.29) | 23.35 (23.27,23.43) | 2.38 (2.38,2.39) |
| Not Normal                   | 55.54 (55.25,55.83) | 40.68 (40.39,40.96) | 23.94 (23.69,24.18) | 37.03 (36.75,37.30) | 31.60 (31.56,31.65) | 3.65 (3.64,3.66) |
| <b>Waist-hip ratio</b>       |                     |                     |                     |                     |                     |                  |
| Normal                       | 37.55 (37.37,37.74) | 24.68 (24.51,24.84) | 12.38 (12.26,12.51) | 22.11 (21.95,22.27) | 25.17 (25.11,25.23) | 2.57 (2.56,2.57) |
| Not Normal                   | 54.57 (54.18,54.97) | 40.50 (40.11,40.88) | 23.53 (23.19,23.86) | 36.51 (36.13,36.89) | 31.04 (30.99,31.11) | 3.99 (3.98,3.99) |

SD: Standard Deviation, SAR: Saudi Arabian Riyals

**Table 3: Characteristics of the Saudi Biobank population not taking antihypertensive medications meeting the definition of HTN and recommended antihypertensive according to 2017 ACC/AHA Guideline and JNC-7 Guideline, 2017-2020.**

|                                                    | HTN according to  |                   |                                  | Recommended treatment by |                   |                                  |
|----------------------------------------------------|-------------------|-------------------|----------------------------------|--------------------------|-------------------|----------------------------------|
|                                                    | ACC<br>(n=4121)   | JNC 7<br>(n=1438) | ACC but not<br>JNC-7<br>(n=2683) | ACC (n=<br>2783)         | JNC 7<br>(n=743)  | ACC but<br>not JNC-7<br>(n=2040) |
| <b>Age, Mean (SD)</b>                              | 31.52 (9.76)      | 33.27<br>(10.73)  | 30.58 (9.06)                     | 32.53<br>(10.23)         | 34.06<br>(10.61)  | 31.97<br>(10.04)                 |
| <b>Male gender, %</b>                              | 60.88             | 66.27             | 57.99                            | 60.15                    | 65.28             | 58.28                            |
| <b>Smoking, %</b>                                  | 17.10             | 17.93             | 16.65                            | 17.06                    | 17.93             | 16.73                            |
| <b>DM, %</b>                                       | 39.75             | 40.13             | 39.55                            | 58.86                    | 77.66             | 52.01                            |
| <b>CVD, (%)</b>                                    | 20.77             | 22.11             | 20.05                            | 30.76                    | 25.30             | 32.75                            |
| <b>BMI, kg/m<sup>2</sup></b>                       |                   |                   |                                  |                          |                   |                                  |
| Underweight                                        | 3.09              | 2.29              | 3.51                             | 2.66                     | 1.75              | 2.99                             |
| Normal weight                                      | 29.50             | 23.64             | 32.65                            | 26.94                    | 22.07             | 28.72                            |
| Overweight                                         | 32.64             | 30.39             | 33.84                            | 33.02                    | 30.55             | 33.92                            |
| Obese                                              | 30.30             | 36.72             | 26.86                            | 32.16                    | 38.63             | 29.80                            |
| Extremely Obese                                    | 4.47              | 6.95              | 3.14                             | 5.22                     | 7.0               | 4.57                             |
| <b>Waist Circum.<br/>(cm)</b>                      |                   |                   |                                  |                          |                   |                                  |
| Not Normal,%                                       | 47.25             | 57.37             | 41.82                            | 50.99                    | 58.55             | 48.24                            |
| <b>WtHR</b>                                        |                   |                   |                                  |                          |                   |                                  |
| Not Normal,%                                       | 23.88             | 28.93             | 21.17                            | 26.05                    | 29.21             | 24.90                            |
| <b>Systolic blood<br/>pressure, Mean<br/>(SD)</b>  | 132.57<br>(16.51) | 143.81<br>(20.88) | 126.55 (9.00)                    | 135.59<br>(18.30)        | 147.43<br>(26.75) | 131.28<br>(11.26)                |
| <b>Diastolic blood<br/>pressure, Mean<br/>(SD)</b> | 84.26<br>(10.19)  | 90.49<br>(13.17)  | 80.92 (5.88)                     | 86.00<br>(11.28)         | 93.48<br>(16.06)  | 83.27<br>(7.20)                  |

**Table 4: Characteristics of the Saudi Biobank population taking antihypertensive medications with BP above treatment goals according to 2017 ACC/AHA Guideline and JNC-7 Guideline, 2017-2020.**

|                                               | BP above goal according to |                |                           |
|-----------------------------------------------|----------------------------|----------------|---------------------------|
|                                               | ACC (n=287)                | JNC 7 (n=161)  | ACC but not JNC-7 (n=126) |
| <b>Age, Mean (SD)</b>                         | 37.26 (9.94)               | 39.71 (9.72)   | 34.13 (9.35)              |
| <b>Male gender, %</b>                         | 40.07                      | 45.34          | 33.33                     |
| <b>Smoking, %</b>                             | 7.80                       | 6.96           | 8.87                      |
| <b>DM, %</b>                                  | 35.89                      | 46.58          | 22.22                     |
| <b>CVD, (%)</b>                               | 25.09                      | 24.84          | 25.40                     |
| <b>BMI, kg/m<sup>2</sup></b>                  |                            |                |                           |
| Underweight                                   | 4.18                       | 2.48           | 6.35                      |
| Normal weight                                 | 28.92                      | 26.71          | 31.75                     |
| Overweight                                    | 32.06                      | 29.19          | 35.71                     |
| Obese                                         | 30.66                      | 34.78          | 25.40                     |
| Extremely Obese                               | 4.18                       | 6.83           | 0.79                      |
| <b>Waist Circum. (cm)</b>                     |                            |                |                           |
| Not Normal, %                                 | 56.45                      | 63.98          | 46.83                     |
| <b>WtHR</b>                                   |                            |                |                           |
| Not Normal, %                                 | 42.16                      | 44.72          | 38.89                     |
| <b>Systolic blood pressure, Mean (SD)</b>     | 135.11 (17.21)             | 144.07 (15.99) | 123.65 (10.71)            |
| <b>Diastolic blood pressure, Mean (SD)</b>    | 88.65 (15.91)              | 93.42 (19.45)  | 82.56 (5.34)              |
| <b>Number of antihypertensive medications</b> |                            |                |                           |
| 1                                             | 45.51                      | 41.59          | 52.31                     |
| 2                                             | 29.78                      | 31.86          | 26.15                     |
| 3                                             | 7.87                       | 7.96           | 7.69                      |
| 4                                             | 8.99                       | 8.85           | 9.23                      |
| ≥5                                            | 7.87                       | 9.73           | 4.62                      |

**Supp. 1. Determinants of hypertension according to guidelines among Saudi Biobank, 2017-2020 (n = 10799)**

| Characteristics              | ACC/AHA          |                  |       | JNC-7            |                   |       |
|------------------------------|------------------|------------------|-------|------------------|-------------------|-------|
|                              | OR (95% CI)      | AOR (95% CI)     | P     | OR (95% CI)      | AOR (95% CI)      | P     |
| <b>Gender</b>                |                  |                  |       |                  |                   |       |
| Women                        | 1.0              | 1.0              |       | 1.0              | 1.0               |       |
| Men                          | 1.80 (1.67,1.95) | 2.79 (2.51,3.11) | <0.01 | 1.95 (1.74,2.18) | 3.10 (2.66,3.60)  | <0.01 |
| <b>Age (years)</b>           |                  |                  |       |                  |                   |       |
| 18-29                        | 1.0              | 1.0              |       | 1.0              | 1.0               |       |
| 30-39                        | 1.43 (1.31,1.57) | 1.27 (1.13,1.44) | <0.01 | 1.42 (1.25,1.62) | 1.39 (1.16,1.67)  | <0.01 |
| 40-49                        | 2.34 (2.06,2.66) | 1.70 (1.44,2.02) | <0.01 | 3.14 (2.69,3.66) | 2.55 (2.03,3.19)  | <0.01 |
| 50-59                        | 3.77 (2.98,3.78) | 2.28 (1.72,3.03) | <0.01 | 4.82 (3.79,6.13) | 3.23 (2.34,4.44)  | <0.01 |
| ≥60                          | 4.39 (2.68,7.17) | 2.09 (1.20,3.63) | 0.009 | 4.53 (2.81,7.28) | 2.21 (1.26,3.87)  | <0.01 |
| <b>Marital status</b>        |                  |                  |       |                  |                   |       |
| Never married                | 1.0              | 1.0              |       | 1.0              | 1.0               |       |
| Married                      | 1.53 (1.41,1.65) | 0.91 (0.81,1.02) | 0.12  | 1.60 (1.43,1.78) | 0.73 (0.61,0.87)  | <0.01 |
| Divorced, separated          | 1.45 (1.14,1.85) | 1.07 (0.81,1.41) | 0.67  | 1.64 (1.19,2.26) | 0.95 (0.66,1.38)  | 0.66  |
| <b>Employment status</b>     |                  |                  |       |                  |                   |       |
| Employed                     | 1.0              | 1.0              |       | 1.0              | 1.0               |       |
| Unemployed                   | 0.87 (0.75,1.00) | 1.27 (1.04,1.55) | 0.01  | 0.89 (0.72,1.08) | 1.35 (1.03,1.78)  | 0.02  |
| Student                      | 0.83 (0.76,0.91) | 1.36 (1.14,1.63) | <0.01 | 0.75 (0.65,0.86) | 1.60 (0.90, 1.50) | 0.21  |
| Retired/others               | 1.21 (1.07,1.37) | 1.21 (1.00,1.45) | 0.03  | 1.35 (1.15,1.58) | 1.24 (0.96,1.59)  | 0.07  |
| <b>Income</b>                |                  |                  |       |                  |                   |       |
| ≤5000                        | 1.0              | 1.0              |       | 1.0              | 1.0               |       |
| 5001 - 10,000                | 0.98 (0.89,1.08) | 0.86 (0.72,1.03) | 0.12  | 0.95 (0.83,1.09) | 0.76 (0.60,0.97)  | 0.04  |
| 1,0001 - 15,000              | 1.45 (1.27,1.65) | 1.03 (0.83,1.27) | 0.66  | 1.45 (1.22,1.72) | 0.94 (0.71,1.25)  | 0.80  |
| 15,001 – 20,000              | 1.63 (1.34,1.99) | 1.08 (0.82,1.43) | 0.45  | 1.68 (1.31,2.15) | 0.98 (0.69,1.39)  | 0.92  |
| >20,000                      | 1.59 (1.22,2.06) | 0.85 (0.61,1.20) | 0.45  | 1.90 (1.40,2.58) | 0.89 (0.58,1.37)  | 0.83  |
| <b>Vigorous exercise</b>     |                  |                  |       |                  |                   |       |
| Never                        | 1.0              | 1.0              |       | 1.0              | 1.0               |       |
| 1                            | 0.85 (0.73,0.99) | 0.79 (0.67,0.94) | <0.01 | 0.84 (0.68,1.05) | 1.17 (0.93,1.48)  | 0.18  |
| 2-3                          | 0.73 (0.63,0.84) | 0.75 (0.65,0.88) | <0.01 | 0.67 (0.54,0.83) | 0.87 (0.64,1.18)  | 0.36  |
| 4-5                          | 0.68 (0.58,0.79) | 0.68 (0.57,0.81) | <0.01 | 0.59 (0.46,0.76) | 0.75 (0.54,1.04)  | 0.08  |
| >5                           | 0.69 (0.57,0.82) | 0.72 (0.59,0.87) | <0.01 | 0.57 (0.43,0.76) | 0.76 (0.53,1.10)  | 0.14  |
| <b>Time standing at work</b> |                  |                  |       |                  |                   |       |

|    |                               |                   |                  |       |                    |                  |       |
|----|-------------------------------|-------------------|------------------|-------|--------------------|------------------|-------|
| 1  |                               |                   |                  |       |                    |                  |       |
| 2  |                               |                   |                  |       |                    |                  |       |
| 3  | Never                         | 1.0               | 1.0              |       | 1.0                | 1.0              |       |
| 4  | A few times                   | 1.09 (0.81,1.46)  | 1.09 (0.80,1.50) | 0.56  | 2.32 (1.34,4.02)   | 2.60 (1.47,4.62) | <0.01 |
| 5  | Sometimes                     | 1.16 (0.86,1.55)  | 1.18 (0.86,1.62) | 0.28  | 2.27 (1.31,3.94)   | 2.60 (1.47,4.62) | <0.01 |
| 6  | Most of the times             | 0.95 (0.70,1.28)  | 1.03 (0.74,1.42) | 0.84  | 2.10 (1.20,3.67)   | 2.66 (1.48,4.76) | <0.01 |
| 7  | All the times                 | 0.87 (0.55,1.37)  | 0.95 (0.58,1.55) | 0.86  | 1.56 (0.71,3.39)   | 1.92 (0.85,4.34) | 0.11  |
| 8  | <b>Current smoker</b>         |                   |                  |       |                    |                  |       |
| 9  | No                            | 1.0               | 1.0              |       | 1.0                | 1.0              |       |
| 10 | Yes                           | 0.96 (0.87,1.07)  | 0.75 (0.66,0.85) | <0.01 | 1.01 (0.87,1.17)   | 0.79 (0.67,0.93) | <0.01 |
| 11 | <b>Diabetes</b>               |                   |                  |       |                    |                  |       |
| 12 | No                            | 1.0               | 1.0              |       | 1.0                | 1.0              |       |
| 13 | Yes                           | 2.55 (2.17,3.00)  | 1.67 (1.40,1.99) | <0.01 | 2.48 (2.39,3.39)   | 1.64 (1.34,2.00) | <0.01 |
| 14 | <b>BMI (kg/m<sup>2</sup>)</b> |                   |                  |       |                    |                  |       |
| 15 | Underweight                   | 1.0               | 1.0              |       | 1.0                | 1.0              |       |
| 16 | Normal weight                 | 1.69 (1.39,2.05)  | 1.67 (1.37,2.04) | <0.01 | 1.70 (1.20,2.41)   | 1.67 (1.17,2.38) | <0.01 |
| 17 | Overweight                    | 3.03 (2.49,3.69)  | 2.43 (1.97,3.00) | <0.01 | 3.01 (2.13,4.24)   | 2.15 (1.50,3.08) | <0.01 |
| 18 | Obese                         | 4.86 (3.97,5.94)  | 3.17 (2.52,3.99) | <0.01 | 5.51 (3.90,7.77)   | 2.97 (2.04,4.34) | <0.01 |
| 19 | Extremely Obese               | 7.90 (5.78,10.79) | 4.64 (3.31,6.52) | <0.01 | 10.62 (7.04,16.01) | 5.24 (3.35,8.19) | <0.01 |
| 20 | <b>Waist Circum.</b>          |                   |                  |       |                    |                  |       |
| 21 | Normal                        | 1.0               | 1.0              |       | 1.0                | 1.0              |       |
| 22 | Not Normal                    | 2.58 (2.38,2.79)  | 1.32 (1.17,1.50) | <0.01 | 3.07 (2.75,3.43)   | 1.53 (1.29,1.81) | <0.01 |
| 23 | <b>Waist to hip ratio</b>     |                   |                  |       |                    |                  |       |
| 24 | Normal                        | 1.0               | 1.0              |       | 1.0                | 1.0              |       |
| 25 | Not Normal                    | 1.99 (1.81,2.20)  | 1.27 (1.13,1.43) | <0.01 | 2.18 (1.93,2.45)   | 1.19 (1.02,1.38) | 0.02  |

Waist Circumference: (men<94, women <80), Waist to hip ratio: (men<0.95, women <0.80), AOR: Adjusted OR.

**Supp. 2. The percentage and determinants of elevated BP according to 2017 ACC/AHA Guideline among Saudi Biobank, 2017-2020 (n = 10799)**

| Characteristics              | Elevated BP according to 2017 ACC/AHA Guideline |                  |                  |         |
|------------------------------|-------------------------------------------------|------------------|------------------|---------|
|                              | Percentage (95% CI)                             | OR (95% CI)      | AOR (95% CI)     | P-value |
| Overall                      | 15.82 (15.69,15.94)                             | -                | -                | -       |
| <b>Gender</b>                |                                                 |                  |                  |         |
| Women                        | 14.07 (13.90,14.24)                             | 1.0              | 1.0              |         |
| Men                          | 17.50 (17.32,17.68)                             | 1.29 (1.17,1.44) | 1.35 (1.19,1.54) | <0.01   |
| <b>Age, years</b>            |                                                 |                  |                  |         |
| 18-29                        | 17.64 (17.47,17.82)                             | 1.0              | 1.0              |         |
| 30-39                        | 13.95 (13.73,14.17)                             | 0.76 (0.67,0.85) | 0.76 (0.66,0.88) | <0.01   |
| 40-49                        | 12.83 (12.47,13.18)                             | 0.69 (0.57,0.83) | 0.71 (0.58,0.87) | <0.01   |
| 50-59                        | 11.35 (10.73,11.98)                             | 0.60 (0.42,0.85) | 0.62 (0.43,0.89) | <0.01   |
| ≥60                          | 10.39 (9.15,11.63)                              | 0.54 (0.26,1.13) | 0.54 (0.26,1.15) | 0.08    |
| <b>Time sitting at work</b>  |                                                 |                  |                  |         |
| Never                        | 8.02 (7.12,8.92)                                | 1.0              | 1.0              |         |
| A few times                  | 15.80 (15.53,16.07)                             | 2.15 (1.08,4.30) | 2.39 (1.19,4.77) | 0.02    |
| Sometimes                    | 16.41 (16.17,16.65)                             | 2.25 (1.13,4.48) | 2.59 (1.30,5.17) | 0.01    |
| Most of the times            | 15.66(15.47,15.84)                              | 2.13 (1.07,4.23) | 2.34 (1.17,4.66) | 0.03    |
| All the times                | 15.44 (14.70,16.17)                             | 2.10 (0.99,4.42) | 2.10 (0.99,4.44) | 0.08    |
| <b>Current smoker</b>        |                                                 |                  |                  |         |
| No                           | 15.62 (15.48,15.75)                             | 1.0              | 1.0              |         |
| Yes                          | 16.80 (16.49,17.12)                             | 1.09 (0.95,1.25) | 0.97 (0.83,1.12) | 0.72    |
| <b>Diabetes</b>              |                                                 |                  |                  |         |
| No                           | 15.76 (15.60,15.92)                             | 1.0              | 1.0              |         |
| Yes                          | 15.91 (15.71,16.11)                             | 0.99 (0.89,1.10) | 1.03 (0.93,1.15) | 0.61    |
| <b>BMI, kg/m<sup>2</sup></b> |                                                 |                  |                  |         |
| Underweight                  | 12.14 (11.69,12.59)                             | 1.0              | 1.0              |         |
| Normal weight                | 16.30 (16.10,16.50)                             | 1.41 (1.10,1.80) | 1.48 (1.16,1.89) | <0.01   |
| Overweight                   | 16.47 (16.23,16.70)                             | 1.43 (1.11,1.83) | 1.64 (1.27,2.12) | <0.01   |
| Obese                        | 15.30 (15.04,15.56)                             | 1.31 (1.01,1.69) | 1.68 (1.26,2.24) | <0.01   |
| Extremely Obese              | 14.41 (13.65,15.16)                             | 1.22 (0.81,1.83) | 1.54 (1.00,2.37) | 0.04    |
| <b>Waist Circum. (cm)</b>    |                                                 |                  |                  |         |
| Normal                       | 16.36 (16.20,16.52)                             | 1.0              | 1.0              |         |
| Not Normal                   | 14.83 (14.62,15.03)                             | 0.89 (0.80,0.99) | 0.91 (0.77,1.07) | 0.21    |
| <b>WtHR</b>                  |                                                 |                  |                  |         |
| Normal                       | 16.27 (16.12,16.41)                             | 1.0              | 1.0              |         |
| Not Normal                   | 13.89 (13.62,14.17)                             | 0.83 (0.72,0.95) | 0.99 (0.84,1.16) | 0.93    |

Waist Circumference: (men<94, women <80), WtHR (Waist to hip ratio): (men<0.95, women <0.80), AOR: Adjusted OR, SR: Saudi Riyals.

**Supp. 3. Sociodemographic and lifestyle characteristics of the Saudi Biobank, 2017-2020**

| Characteristics              | Total (n=10799) |        | Men (n=5497) |        | Women (n=5302) |        |
|------------------------------|-----------------|--------|--------------|--------|----------------|--------|
|                              | n               | %      | n            | %      | n              | %      |
| <b>Age, years</b>            |                 |        |              |        |                |        |
| <b>Mean (SD)</b>             | 30.05           | (8.85) | 29.78        | (8.52) | 30.34          | (9.18) |
| 18-29                        | 6110            | 56.58  | 3189         | 58.01  | 2921           | 55.09  |
| 30-39                        | 3140            | 29.08  | 1612         | 29.33  | 1528           | 28.82  |
| 40-49                        | 1146            | 10.61  | 517          | 9.41   | 629            | 11.86  |
| 50-59                        | 326             | 3.02   | 138          | 2.51   | 188            | 3.55   |
| ≥60                          | 77              | 0.71   | 41           | 0.75   | 36             | 0.68   |
| <b>Marital status</b>        |                 |        |              |        |                |        |
| Never married                | 5874            | 54.39  | 3118         | 56.72  | 2756           | 51.98  |
| Married                      | 4587            | 42.48  | 2293         | 41.71  | 2294           | 43.27  |
| Divorced                     | 270             | 2.50   | 49           | 0.89   | 221            | 4.17   |
| Missing                      | 68              | 0.63   | 37           | 0.67   | 31             | 0.58   |
| <b>Employment</b>            |                 |        |              |        |                |        |
| Employed                     | 5453            | 50.50  | 3852         | 70.07  | 1601           | 30.20  |
| Unemployed                   | 960             | 8.89   | 184          | 3.35   | 776            | 14.64  |
| Student                      | 2950            | 27.32  | 1201         | 21.85  | 1749           | 32.99  |
| Retired/others               | 1307            | 12.10  | 155          | 2.82   | 1152           | 21.73  |
| Missing                      | 129             | 1.19   | 105          | 1.91   | 24             | 0.45   |
| <b>Family income, SAR</b>    |                 |        |              |        |                |        |
| ≤5000                        | 3487            | 32.29  | 1231         | 22.39  | 2256           | 42.55  |
| 5001 - 10,000                | 2371            | 21.96  | 1849         | 33.64  | 522            | 9.85   |
| 1,0001 - 15,000              | 1006            | 9.32   | 675          | 12.28  | 331            | 6.24   |
| 15,001 – 20,000              | 413             | 3.82   | 276          | 5.02   | 137            | 2.58   |
| >20,000                      | 221             | 2.05   | 176          | 3.20   | 45             | 0.85   |
| Missing                      | 3301            | 30.57  | 1290         | 23.47  | 2011           | 37.93  |
| <b>Education level</b>       |                 |        |              |        |                |        |
| < Primary school             | 119             | 1.10   | 23           | 0.42   | 96             | 1.81   |
| Primary school               | 235             | 2.18   | 55           | 1.00   | 180            | 3.39   |
| Intermediate school          | 372             | 3.44   | 154          | 2.80   | 218            | 4.11   |
| High school                  | 4557            | 42.20  | 2752         | 50.06  | 1805           | 34.04  |
| Some college                 | 759             | 7.03   | 591          | 10.75  | 168            | 3.17   |
| Bachelor's degree            | 4346            | 40.24  | 1738         | 31.62  | 2608           | 49.19  |
| Higher education             | 345             | 3.19   | 137          | 2.49   | 208            | 3.92   |
| Missing                      | 66              | 0.61   | 47           | 0.86   | 19             | 0.36   |
| <b>BMI, kg/m<sup>2</sup></b> |                 |        |              |        |                |        |



|    |                                                   |        |         |        |         |        |         |
|----|---------------------------------------------------|--------|---------|--------|---------|--------|---------|
| 1  |                                                   |        |         |        |         |        |         |
| 2  |                                                   |        |         |        |         |        |         |
| 3  | Underweight                                       | 683    | 6.32    | 343    | 6.24    | 340    | 6.41    |
| 4  | Normal weight                                     | 4206   | 38.99   | 2108   | 38.35   | 2098   | 39.57   |
| 5  | Overweight                                        | 3235   | 29.99   | 1741   | 31.67   | 1494   | 28.18   |
| 6  | Obese                                             | 2386   | 22.12   | 1165   | 21.19   | 1221   | 23.03   |
| 7  | Extremely obese                                   | 277    | 2.57    | 132    | 2.40    | 145    | 2.73    |
| 8  | Missing                                           | 12     | 0.11    | 4      | 0.08    | 8      | 0.15    |
| 9  | <b>Tobacco use</b>                                |        |         |        |         |        |         |
| 10 | Yes                                               | 1756   | 16.26   | 1690   | 30.74   | 66     | 1.24    |
| 11 | Missing                                           | 232    | 2.15    | 182    | 3.31    | 50     | 0.94    |
| 12 | <b>Vigorous exercise, week</b>                    |        |         |        |         |        |         |
| 13 | Never                                             | 7635   | 70.70   | 3168   | 57.63   | 4467   | 84.25   |
| 14 | Once                                              | 744    | 6.89    | 571    | 10.39   | 173    | 3.26    |
| 15 | 2-3                                               | 944    | 8.74    | 615    | 11.19   | 329    | 6.21    |
| 16 | 4-5                                               | 740    | 6.85    | 556    | 10.11   | 184    | 3.47    |
| 17 | >5                                                | 541    | 5.01    | 423    | 7.70    | 118    | 2.23    |
| 18 | Missing                                           | 195    | 1.81    | 164    | 2.98    | 31     | 0.58    |
| 19 | <b>Time spent standing, week</b>                  |        |         |        |         |        |         |
| 20 | Never                                             | 198    | 1.83    | 138    | 2.51    | 60     | 1.13    |
| 21 | A few times                                       | 4098   | 37.95   | 1998   | 36.35   | 2100   | 39.61   |
| 22 | Sometimes                                         | 4261   | 39.46   | 1997   | 36.33   | 2264   | 42.70   |
| 23 | Most of the times                                 | 1864   | 17.26   | 1045   | 19.01   | 819    | 15.45   |
| 24 | All the times                                     | 131    | 1.21    | 114    | 2.07    | 17     | 0.32    |
| 25 | Missing                                           | 247    | 2.29    | 205    | 3.73    | 42     | 0.79    |
| 26 | <b>Waist circum., cm</b>                          |        |         |        |         |        |         |
| 27 | <b>mean (SD)</b>                                  | 82.39  | (16.09) | 88.52  | (15.12) | 76.01  | (14.51) |
| 28 | Missing                                           | 105    | 0.97    | 43     | 0.78    | 62     | 1.17    |
| 29 | <b>Waist to hip ratio</b>                         |        |         |        |         |        |         |
| 30 | <b>mean (SD)</b>                                  | 0.81   | (0.10)  | 0.87   | (0.08)  | 0.75   | (0.09)  |
| 31 | Missing                                           | 112    | 1.04    | 45     | 0.82    | 67     | 1.26    |
| 32 | <b>Diabetes History</b>                           |        |         |        |         |        |         |
| 33 | Yes                                               | 659    | 6.10    | 336    | 6.11    | 323    | 6.09    |
| 34 | <b>Blood pressure, mmHg</b>                       |        |         |        |         |        |         |
| 35 | Systolic blood pressure                           | 120.73 | 15.01   | 123.97 | 15.24   | 117.37 | 14.01   |
| 36 | Diastolic blood pressure                          | 75.24  | 10.70   | 76.46  | 10.70   | 73.97  | 10.56   |
| 37 | SD: Standard Deviation, SAR: Saudi Arabian Riyals |        |         |        |         |        |         |
| 38 |                                                   |        |         |        |         |        |         |
| 39 |                                                   |        |         |        |         |        |         |
| 40 |                                                   |        |         |        |         |        |         |
| 41 |                                                   |        |         |        |         |        |         |
| 42 |                                                   |        |         |        |         |        |         |
| 43 |                                                   |        |         |        |         |        |         |
| 44 |                                                   |        |         |        |         |        |         |
| 45 |                                                   |        |         |        |         |        |         |
| 46 |                                                   |        |         |        |         |        |         |
| 47 |                                                   |        |         |        |         |        |         |

**Supp. 1. Determinants of hypertension according to guidelines among Saudi Biobank, 2017-2020 (n = 10799)**

| Characteristics              | ACC/AHA          |                  |       | JNC-7            |                   |       |
|------------------------------|------------------|------------------|-------|------------------|-------------------|-------|
|                              | OR (95% CI)      | AOR (95% CI)     | P     | OR (95% CI)      | AOR (95% CI)      | P     |
| <b>Gender</b>                |                  |                  |       |                  |                   |       |
| Women                        | 1.0              | 1.0              |       | 1.0              | 1.0               |       |
| Men                          | 1.80 (1.67,1.95) | 2.79 (2.51,3.11) | <0.01 | 1.95 (1.74,2.18) | 3.10 (2.66,3.60)  | <0.01 |
| <b>Age (years)</b>           |                  |                  |       |                  |                   |       |
| 18-29                        | 1.0              | 1.0              |       | 1.0              | 1.0               |       |
| 30-39                        | 1.43 (1.31,1.57) | 1.27 (1.13,1.44) | <0.01 | 1.42 (1.25,1.62) | 1.39 (1.16,1.67)  | <0.01 |
| 40-49                        | 2.34 (2.06,2.66) | 1.70 (1.44,2.02) | <0.01 | 3.14 (2.69,3.66) | 2.55 (2.03,3.19)  | <0.01 |
| 50-59                        | 3.77 (2.98,3.78) | 2.28 (1.72,3.03) | <0.01 | 4.82 (3.79,6.13) | 3.23 (2.34,4.44)  | <0.01 |
| ≥60                          | 4.39 (2.68,7.17) | 2.09 (1.20,3.63) | 0.009 | 4.53 (2.81,7.28) | 2.21 (1.26,3.87)  | <0.01 |
| <b>Marital status</b>        |                  |                  |       |                  |                   |       |
| Never married                | 1.0              | 1.0              |       | 1.0              | 1.0               |       |
| Married                      | 1.53 (1.41,1.65) | 0.91 (0.81,1.02) | 0.12  | 1.60 (1.43,1.78) | 0.73 (0.61,0.87)  | <0.01 |
| Divorced, separated          | 1.45 (1.14,1.85) | 1.07 (0.81,1.41) | 0.67  | 1.64 (1.19,2.26) | 0.95 (0.66,1.38)  | 0.66  |
| <b>Employment status</b>     |                  |                  |       |                  |                   |       |
| Employed                     | 1.0              | 1.0              |       | 1.0              | 1.0               |       |
| Unemployed                   | 0.87 (0.75,1.00) | 1.27 (1.04,1.55) | 0.01  | 0.89 (0.72,1.08) | 1.35 (1.03,1.78)  | 0.02  |
| Student                      | 0.83 (0.76,0.91) | 1.36 (1.14,1.63) | <0.01 | 0.75 (0.65,0.86) | 1.60 (0.90, 1.50) | 0.21  |
| Retired/others               | 1.21 (1.07,1.37) | 1.21 (1.00,1.45) | 0.03  | 1.35 (1.15,1.58) | 1.24 (0.96,1.59)  | 0.07  |
| <b>Income</b>                |                  |                  |       |                  |                   |       |
| ≤5000                        | 1.0              | 1.0              |       | 1.0              | 1.0               |       |
| 5001 - 10,000                | 0.98 (0.89,1.08) | 0.86 (0.72,1.03) | 0.12  | 0.95 (0.83,1.09) | 0.76 (0.60,0.97)  | 0.04  |
| 1,0001 - 15,000              | 1.45 (1.27,1.65) | 1.03 (0.83,1.27) | 0.66  | 1.45 (1.22,1.72) | 0.94 (0.71,1.25)  | 0.80  |
| 15,001 – 20,000              | 1.63 (1.34,1.99) | 1.08 (0.82,1.43) | 0.45  | 1.68 (1.31,2.15) | 0.98 (0.69,1.39)  | 0.92  |
| >20,000                      | 1.59 (1.22,2.06) | 0.85 (0.61,1.20) | 0.45  | 1.90 (1.40,2.58) | 0.89 (0.58,1.37)  | 0.83  |
| <b>Vigorous exercise</b>     |                  |                  |       |                  |                   |       |
| Never                        | 1.0              | 1.0              |       | 1.0              | 1.0               |       |
| 1                            | 0.85 (0.73,0.99) | 0.79 (0.67,0.94) | <0.01 | 0.84 (0.68,1.05) | 1.17 (0.93,1.48)  | 0.18  |
| 2-3                          | 0.73 (0.63,0.84) | 0.75 (0.65,0.88) | <0.01 | 0.67 (0.54,0.83) | 0.87 (0.64,1.18)  | 0.36  |
| 4-5                          | 0.68 (0.58,0.79) | 0.68 (0.57,0.81) | <0.01 | 0.59 (0.46,0.76) | 0.75 (0.54,1.04)  | 0.08  |
| >5                           | 0.69 (0.57,0.82) | 0.72 (0.59,0.87) | <0.01 | 0.57 (0.43,0.76) | 0.76 (0.53,1.10)  | 0.14  |
| <b>Time standing at work</b> |                  |                  |       |                  |                   |       |

1  
2  
3  
4  
5  
6  
7  
8  
9  
10  
11  
12  
13  
14  
15  
16  
17  
18  
19  
20  
21  
22  
23  
24  
25  
26  
27  
28  
29  
30  
31  
32  
33  
34  
35  
36  
37  
38  
39  
40  
41  
42  
43  
44  
45  
46  
47

|                               |                   |                  |       |                    |                  |       |
|-------------------------------|-------------------|------------------|-------|--------------------|------------------|-------|
| Never                         | 1.0               | 1.0              |       | 1.0                | 1.0              |       |
| A few times                   | 1.09 (0.81,1.46)  | 1.09 (0.80,1.50) | 0.56  | 2.32 (1.34,4.02)   | 2.60 (1.47,4.62) | <0.01 |
| Sometimes                     | 1.16 (0.86,1.55)  | 1.18 (0.86,1.62) | 0.28  | 2.27 (1.31,3.94)   | 2.60 (1.47,4.62) | <0.01 |
| Most of the times             | 0.95 (0.70,1.28)  | 1.03 (0.74,1.42) | 0.84  | 2.10 (1.20,3.67)   | 2.66 (1.48,4.76) | <0.01 |
| All the times                 | 0.87 (0.55,1.37)  | 0.95 (0.58,1.55) | 0.86  | 1.56 (0.71,3.39)   | 1.92 (0.85,4.34) | 0.11  |
| <b>Current smoker</b>         |                   |                  |       |                    |                  |       |
| No                            | 1.0               | 1.0              |       | 1.0                | 1.0              |       |
| Yes                           | 0.96 (0.87,1.07)  | 0.75 (0.66,0.85) | <0.01 | 1.01 (0.87,1.17)   | 0.79 (0.67,0.93) | <0.01 |
| <b>Diabetes</b>               |                   |                  |       |                    |                  |       |
| No                            | 1.0               | 1.0              |       | 1.0                | 1.0              |       |
| Yes                           | 2.55 (2.17,3.00)  | 1.67 (1.40,1.99) | <0.01 | 2.48 (2.39,3.39)   | 1.64 (1.34,2.00) | <0.01 |
| <b>BMI (kg/m<sup>2</sup>)</b> |                   |                  |       |                    |                  |       |
| Underweight                   | 1.0               | 1.0              |       | 1.0                | 1.0              |       |
| Normal weight                 | 1.69 (1.39,2.05)  | 1.67 (1.37,2.04) | <0.01 | 1.70 (1.20,2.41)   | 1.67 (1.17,2.38) | <0.01 |
| Overweight                    | 3.03 (2.49,3.69)  | 2.43 (1.97,3.00) | <0.01 | 3.01 (2.13,4.24)   | 2.15 (1.50,3.08) | <0.01 |
| Obese                         | 4.86 (3.97,5.94)  | 3.17 (2.52,3.99) | <0.01 | 5.51 (3.90,7.77)   | 2.97 (2.04,4.34) | <0.01 |
| Extremely Obese               | 7.90 (5.78,10.79) | 4.64 (3.31,6.52) | <0.01 | 10.62 (7.04,16.01) | 5.24 (3.35,8.19) | <0.01 |
| <b>Waist Circum.</b>          |                   |                  |       |                    |                  |       |
| Normal                        | 1.0               | 1.0              |       | 1.0                | 1.0              |       |
| Not Normal                    | 2.58 (2.38,2.79)  | 1.32 (1.17,1.50) | <0.01 | 3.07 (2.75,3.43)   | 1.53 (1.29,1.81) | <0.01 |
| <b>Waist to hip ratio</b>     |                   |                  |       |                    |                  |       |
| Normal                        | 1.0               | 1.0              |       | 1.0                | 1.0              |       |
| Not Normal                    | 1.99 (1.81,2.20)  | 1.27 (1.13,1.43) | <0.01 | 2.18 (1.93,2.45)   | 1.19 (1.02,1.38) | 0.02  |

Waist Circumference: (men<94, women <80), Waist to hip ratio: (men<0.95, women <0.80), AOR: Adjusted OR.

**Supp. 2. The percentage and determinants of elevated BP according to 2017 ACC/AHA Guideline among Saudi Biobank, 2017-2020 (n = 10799)**

| Characteristics              | Elevated BP according to 2017 ACC/AHA Guideline |                  |                  |         |
|------------------------------|-------------------------------------------------|------------------|------------------|---------|
|                              | Percentage (95% CI)                             | OR (95% CI)      | AOR (95% CI)     | P-value |
| Overall                      | 15.82 (15.69,15.94)                             | -                | -                | -       |
| <b>Gender</b>                |                                                 |                  |                  |         |
| Women                        | 14.07 (13.90,14.24)                             | 1.0              | 1.0              |         |
| Men                          | 17.50 (17.32,17.68)                             | 1.29 (1.17,1.44) | 1.35 (1.19,1.54) | <0.01   |
| <b>Age, years</b>            |                                                 |                  |                  |         |
| 18-29                        | 17.64 (17.47,17.82)                             | 1.0              | 1.0              |         |
| 30-39                        | 13.95 (13.73,14.17)                             | 0.76 (0.67,0.85) | 0.76 (0.66,0.88) | <0.01   |
| 40-49                        | 12.83 (12.47,13.18)                             | 0.69 (0.57,0.83) | 0.71 (0.58,0.87) | <0.01   |
| 50-59                        | 11.35 (10.73,11.98)                             | 0.60 (0.42,0.85) | 0.62 (0.43,0.89) | <0.01   |
| ≥60                          | 10.39 (9.15,11.63)                              | 0.54 (0.26,1.13) | 0.54 (0.26,1.15) | 0.08    |
| <b>Time sitting at work</b>  |                                                 |                  |                  |         |
| Never                        | 8.02 (7.12,8.92)                                | 1.0              | 1.0              |         |
| A few times                  | 15.80 (15.53,16.07)                             | 2.15 (1.08,4.30) | 2.39 (1.19,4.77) | 0.02    |
| Sometimes                    | 16.41 (16.17,16.65)                             | 2.25 (1.13,4.48) | 2.59 (1.30,5.17) | 0.01    |
| Most of the times            | 15.66(15.47,15.84)                              | 2.13 (1.07,4.23) | 2.34 (1.17,4.66) | 0.03    |
| All the times                | 15.44 (14.70,16.17)                             | 2.10 (0.99,4.42) | 2.10 (0.99,4.44) | 0.08    |
| <b>Current smoker</b>        |                                                 |                  |                  |         |
| No                           | 15.62 (15.48,15.75)                             | 1.0              | 1.0              |         |
| Yes                          | 16.80 (16.49,17.12)                             | 1.09 (0.95,1.25) | 0.97 (0.83,1.12) | 0.72    |
| <b>Diabetes</b>              |                                                 |                  |                  |         |
| No                           | 15.76 (15.60,15.92)                             | 1.0              | 1.0              |         |
| Yes                          | 15.91 (15.71,16.11)                             | 0.99 (0.89,1.10) | 1.03 (0.93,1.15) | 0.61    |
| <b>BMI, kg/m<sup>2</sup></b> |                                                 |                  |                  |         |
| Underweight                  | 12.14 (11.69,12.59)                             | 1.0              | 1.0              |         |
| Normal weight                | 16.30 (16.10,16.50)                             | 1.41 (1.10,1.80) | 1.48 (1.16,1.89) | <0.01   |
| Overweight                   | 16.47 (16.23,16.70)                             | 1.43 (1.11,1.83) | 1.64 (1.27,2.12) | <0.01   |
| Obese                        | 15.30 (15.04,15.56)                             | 1.31 (1.01,1.69) | 1.68 (1.26,2.24) | <0.01   |
| Extremely Obese              | 14.41 (13.65,15.16)                             | 1.22 (0.81,1.83) | 1.54 (1.00,2.37) | 0.04    |
| <b>Waist Circum. (cm)</b>    |                                                 |                  |                  |         |
| Normal                       | 16.36 (16.20,16.52)                             | 1.0              | 1.0              |         |
| Not Normal                   | 14.83 (14.62,15.03)                             | 0.89 (0.80,0.99) | 0.91 (0.77,1.07) | 0.21    |
| <b>WtHR</b>                  |                                                 |                  |                  |         |
| Normal                       | 16.27 (16.12,16.41)                             | 1.0              | 1.0              |         |
| Not Normal                   | 13.89 (13.62,14.17)                             | 0.83 (0.72,0.95) | 0.99 (0.84,1.16) | 0.93    |

Waist Circumference: (men<94, women <80), WtHR (Waist to hip ratio): (men<0.95, women <0.80), AOR: Adjusted OR, SR: Saudi Riyals.

**Supp. 3. Sociodemographic and lifestyle characteristics of the Saudi Biobank, 2017-2020**

| Characteristics              | Total (n=10799) |        | Men (n=5497) |        | Women (n=5302) |        |
|------------------------------|-----------------|--------|--------------|--------|----------------|--------|
|                              | n               | %      | n            | %      | n              | %      |
| <b>Age, years</b>            |                 |        |              |        |                |        |
| <b>Mean (SD)</b>             | 30.05           | (8.85) | 29.78        | (8.52) | 30.34          | (9.18) |
| 18-29                        | 6110            | 56.58  | 3189         | 58.01  | 2921           | 55.09  |
| 30-39                        | 3140            | 29.08  | 1612         | 29.33  | 1528           | 28.82  |
| 40-49                        | 1146            | 10.61  | 517          | 9.41   | 629            | 11.86  |
| 50-59                        | 326             | 3.02   | 138          | 2.51   | 188            | 3.55   |
| ≥60                          | 77              | 0.71   | 41           | 0.75   | 36             | 0.68   |
| <b>Marital status</b>        |                 |        |              |        |                |        |
| Never married                | 5874            | 54.39  | 3118         | 56.72  | 2756           | 51.98  |
| Married                      | 4587            | 42.48  | 2293         | 41.71  | 2294           | 43.27  |
| Divorced                     | 270             | 2.50   | 49           | 0.89   | 221            | 4.17   |
| Missing                      | 68              | 0.63   | 37           | 0.67   | 31             | 0.58   |
| <b>Employment</b>            |                 |        |              |        |                |        |
| Employed                     | 5453            | 50.50  | 3852         | 70.07  | 1601           | 30.20  |
| Unemployed                   | 960             | 8.89   | 184          | 3.35   | 776            | 14.64  |
| Student                      | 2950            | 27.32  | 1201         | 21.85  | 1749           | 32.99  |
| Retired/others               | 1307            | 12.10  | 155          | 2.82   | 1152           | 21.73  |
| Missing                      | 129             | 1.19   | 105          | 1.91   | 24             | 0.45   |
| <b>Family income, SAR</b>    |                 |        |              |        |                |        |
| ≤5000                        | 3487            | 32.29  | 1231         | 22.39  | 2256           | 42.55  |
| 5001 - 10,000                | 2371            | 21.96  | 1849         | 33.64  | 522            | 9.85   |
| 1,0001 - 15,000              | 1006            | 9.32   | 675          | 12.28  | 331            | 6.24   |
| 15,001 – 20,000              | 413             | 3.82   | 276          | 5.02   | 137            | 2.58   |
| >20,000                      | 221             | 2.05   | 176          | 3.20   | 45             | 0.85   |
| Missing                      | 3301            | 30.57  | 1290         | 23.47  | 2011           | 37.93  |
| <b>Education level</b>       |                 |        |              |        |                |        |
| < Primary school             | 119             | 1.10   | 23           | 0.42   | 96             | 1.81   |
| Primary school               | 235             | 2.18   | 55           | 1.00   | 180            | 3.39   |
| Intermediate school          | 372             | 3.44   | 154          | 2.80   | 218            | 4.11   |
| High school                  | 4557            | 42.20  | 2752         | 50.06  | 1805           | 34.04  |
| Some college                 | 759             | 7.03   | 591          | 10.75  | 168            | 3.17   |
| Bachelor's degree            | 4346            | 40.24  | 1738         | 31.62  | 2608           | 49.19  |
| Higher education             | 345             | 3.19   | 137          | 2.49   | 208            | 3.92   |
| Missing                      | 66              | 0.61   | 47           | 0.86   | 19             | 0.36   |
| <b>BMI, kg/m<sup>2</sup></b> |                 |        |              |        |                |        |

|                                                   |        |         |        |         |        |         |
|---------------------------------------------------|--------|---------|--------|---------|--------|---------|
| Underweight                                       | 683    | 6.32    | 343    | 6.24    | 340    | 6.41    |
| Normal weight                                     | 4206   | 38.99   | 2108   | 38.35   | 2098   | 39.57   |
| Overweight                                        | 3235   | 29.99   | 1741   | 31.67   | 1494   | 28.18   |
| Obese                                             | 2386   | 22.12   | 1165   | 21.19   | 1221   | 23.03   |
| Extremely obese                                   | 277    | 2.57    | 132    | 2.40    | 145    | 2.73    |
| Missing                                           | 12     | 0.11    | 4      | 0.08    | 8      | 0.15    |
| <b>Tobacco use</b>                                |        |         |        |         |        |         |
| Yes                                               | 1756   | 16.26   | 1690   | 30.74   | 66     | 1.24    |
| Missing                                           | 232    | 2.15    | 182    | 3.31    | 50     | 0.94    |
| <b>Vigorous exercise, week</b>                    |        |         |        |         |        |         |
| Never                                             | 7635   | 70.70   | 3168   | 57.63   | 4467   | 84.25   |
| Once                                              | 744    | 6.89    | 571    | 10.39   | 173    | 3.26    |
| 2-3                                               | 944    | 8.74    | 615    | 11.19   | 329    | 6.21    |
| 4-5                                               | 740    | 6.85    | 556    | 10.11   | 184    | 3.47    |
| >5                                                | 541    | 5.01    | 423    | 7.70    | 118    | 2.23    |
| Missing                                           | 195    | 1.81    | 164    | 2.98    | 31     | 0.58    |
| <b>Time spent standing, week</b>                  |        |         |        |         |        |         |
| Never                                             | 198    | 1.83    | 138    | 2.51    | 60     | 1.13    |
| A few times                                       | 4098   | 37.95   | 1998   | 36.35   | 2100   | 39.61   |
| Sometimes                                         | 4261   | 39.46   | 1997   | 36.33   | 2264   | 42.70   |
| Most of the times                                 | 1864   | 17.26   | 1045   | 19.01   | 819    | 15.45   |
| All the times                                     | 131    | 1.21    | 114    | 2.07    | 17     | 0.32    |
| Missing                                           | 247    | 2.29    | 205    | 3.73    | 42     | 0.79    |
| <b>Waist circum., cm</b>                          |        |         |        |         |        |         |
| <b>mean (SD)</b>                                  | 82.39  | (16.09) | 88.52  | (15.12) | 76.01  | (14.51) |
| Missing                                           | 105    | 0.97    | 43     | 0.78    | 62     | 1.17    |
| <b>Waist to hip ratio</b>                         |        |         |        |         |        |         |
| <b>mean (SD)</b>                                  | 0.81   | (0.10)  | 0.87   | (0.08)  | 0.75   | (0.09)  |
| Missing                                           | 112    | 1.04    | 45     | 0.82    | 67     | 1.26    |
| <b>Diabetes History</b>                           |        |         |        |         |        |         |
| Yes                                               | 659    | 6.10    | 336    | 6.11    | 323    | 6.09    |
| <b>Blood pressure, mmHg</b>                       |        |         |        |         |        |         |
| Systolic blood pressure                           | 120.73 | 15.01   | 123.97 | 15.24   | 117.37 | 14.01   |
| Diastolic blood pressure                          | 75.24  | 10.70   | 76.46  | 10.70   | 73.97  | 10.56   |
| SD: Standard Deviation, SAR: Saudi Arabian Riyals |        |         |        |         |        |         |

1  
2  
3  
4  
5  
6  
7  
8  
9  
10  
11  
12  
13  
14  
15  
16  
17  
18  
19  
20  
21  
22  
23  
24  
25  
26  
27  
28  
29  
30  
31  
32  
33  
34  
35  
36  
37  
38  
39  
40  
41  
42  
43  
44  
45  
46  
47

**Supp. 1. Determinants of hypertension according to guidelines among Saudi Biobank, 2017-2020 (n = 10799)**

| Characteristics              | ACC/AHA          |                  |       | JNC-7            |                   |       |
|------------------------------|------------------|------------------|-------|------------------|-------------------|-------|
|                              | OR (95% CI)      | AOR (95% CI)     | P     | OR (95% CI)      | AOR (95% CI)      | P     |
| <b>Gender</b>                |                  |                  |       |                  |                   |       |
| Women                        | 1.0              | 1.0              |       | 1.0              | 1.0               |       |
| Men                          | 1.80 (1.67,1.95) | 2.79 (2.51,3.11) | <0.01 | 1.95 (1.74,2.18) | 3.10 (2.66,3.60)  | <0.01 |
| <b>Age (years)</b>           |                  |                  |       |                  |                   |       |
| 18-29                        | 1.0              | 1.0              |       | 1.0              | 1.0               |       |
| 30-39                        | 1.43 (1.31,1.57) | 1.27 (1.13,1.44) | <0.01 | 1.42 (1.25,1.62) | 1.39 (1.16,1.67)  | <0.01 |
| 40-49                        | 2.34 (2.06,2.66) | 1.70 (1.44,2.02) | <0.01 | 3.14 (2.69,3.66) | 2.55 (2.03,3.19)  | <0.01 |
| 50-59                        | 3.77 (2.98,3.78) | 2.28 (1.72,3.03) | <0.01 | 4.82 (3.79,6.13) | 3.23 (2.34,4.44)  | <0.01 |
| ≥60                          | 4.39 (2.68,7.17) | 2.09 (1.20,3.63) | 0.009 | 4.53 (2.81,7.28) | 2.21 (1.26,3.87)  | <0.01 |
| <b>Marital status</b>        |                  |                  |       |                  |                   |       |
| Never married                | 1.0              | 1.0              |       | 1.0              | 1.0               |       |
| Married                      | 1.53 (1.41,1.65) | 0.91 (0.81,1.02) | 0.12  | 1.60 (1.43,1.78) | 0.73 (0.61,0.87)  | <0.01 |
| Divorced, separated          | 1.45 (1.14,1.85) | 1.07 (0.81,1.41) | 0.67  | 1.64 (1.19,2.26) | 0.95 (0.66,1.38)  | 0.66  |
| <b>Employment status</b>     |                  |                  |       |                  |                   |       |
| Employed                     | 1.0              | 1.0              |       | 1.0              | 1.0               |       |
| Unemployed                   | 0.87 (0.75,1.00) | 1.27 (1.04,1.55) | 0.01  | 0.89 (0.72,1.08) | 1.35 (1.03,1.78)  | 0.02  |
| Student                      | 0.83 (0.76,0.91) | 1.36 (1.14,1.63) | <0.01 | 0.75 (0.65,0.86) | 1.60 (0.90, 1.50) | 0.21  |
| Retired/others               | 1.21 (1.07,1.37) | 1.21 (1.00,1.45) | 0.03  | 1.35 (1.15,1.58) | 1.24 (0.96,1.59)  | 0.07  |
| <b>Income</b>                |                  |                  |       |                  |                   |       |
| ≤5000                        | 1.0              | 1.0              |       | 1.0              | 1.0               |       |
| 5001 - 10,000                | 0.98 (0.89,1.08) | 0.86 (0.72,1.03) | 0.12  | 0.95 (0.83,1.09) | 0.76 (0.60,0.97)  | 0.04  |
| 1,0001 - 15,000              | 1.45 (1.27,1.65) | 1.03 (0.83,1.27) | 0.66  | 1.45 (1.22,1.72) | 0.94 (0.71,1.25)  | 0.80  |
| 15,001 – 20,000              | 1.63 (1.34,1.99) | 1.08 (0.82,1.43) | 0.45  | 1.68 (1.31,2.15) | 0.98 (0.69,1.39)  | 0.92  |
| >20,000                      | 1.59 (1.22,2.06) | 0.85 (0.61,1.20) | 0.45  | 1.90 (1.40,2.58) | 0.89 (0.58,1.37)  | 0.83  |
| <b>Vigorous exercise</b>     |                  |                  |       |                  |                   |       |
| Never                        | 1.0              | 1.0              |       | 1.0              | 1.0               |       |
| 1                            | 0.85 (0.73,0.99) | 0.79 (0.67,0.94) | <0.01 | 0.84 (0.68,1.05) | 1.17 (0.93,1.48)  | 0.18  |
| 2-3                          | 0.73 (0.63,0.84) | 0.75 (0.65,0.88) | <0.01 | 0.67 (0.54,0.83) | 0.87 (0.64,1.18)  | 0.36  |
| 4-5                          | 0.68 (0.58,0.79) | 0.68 (0.57,0.81) | <0.01 | 0.59 (0.46,0.76) | 0.75 (0.54,1.04)  | 0.08  |
| >5                           | 0.69 (0.57,0.82) | 0.72 (0.59,0.87) | <0.01 | 0.57 (0.43,0.76) | 0.76 (0.53,1.10)  | 0.14  |
| <b>Time standing at work</b> |                  |                  |       |                  |                   |       |

|    |                               |                   |                  |       |                    |                  |       |
|----|-------------------------------|-------------------|------------------|-------|--------------------|------------------|-------|
| 1  |                               |                   |                  |       |                    |                  |       |
| 2  |                               |                   |                  |       |                    |                  |       |
| 3  | Never                         | 1.0               | 1.0              |       | 1.0                | 1.0              |       |
| 4  | A few times                   | 1.09 (0.81,1.46)  | 1.09 (0.80,1.50) | 0.56  | 2.32 (1.34,4.02)   | 2.60 (1.47,4.62) | <0.01 |
| 5  | Sometimes                     | 1.16 (0.86,1.55)  | 1.18 (0.86,1.62) | 0.28  | 2.27 (1.31,3.94)   | 2.60 (1.47,4.62) | <0.01 |
| 6  | Most of the times             | 0.95 (0.70,1.28)  | 1.03 (0.74,1.42) | 0.84  | 2.10 (1.20,3.67)   | 2.66 (1.48,4.76) | <0.01 |
| 7  | All the times                 | 0.87 (0.55,1.37)  | 0.95 (0.58,1.55) | 0.86  | 1.56 (0.71,3.39)   | 1.92 (0.85,4.34) | 0.11  |
| 8  | <b>Current smoker</b>         |                   |                  |       |                    |                  |       |
| 9  | No                            | 1.0               | 1.0              |       | 1.0                | 1.0              |       |
| 10 | Yes                           | 0.96 (0.87,1.07)  | 0.75 (0.66,0.85) | <0.01 | 1.01 (0.87,1.17)   | 0.79 (0.67,0.93) | <0.01 |
| 11 | <b>Diabetes</b>               |                   |                  |       |                    |                  |       |
| 12 | No                            | 1.0               | 1.0              |       | 1.0                | 1.0              |       |
| 13 | Yes                           | 2.55 (2.17,3.00)  | 1.67 (1.40,1.99) | <0.01 | 2.48 (2.39,3.39)   | 1.64 (1.34,2.00) | <0.01 |
| 14 | <b>BMI (kg/m<sup>2</sup>)</b> |                   |                  |       |                    |                  |       |
| 15 | Underweight                   | 1.0               | 1.0              |       | 1.0                | 1.0              |       |
| 16 | Normal weight                 | 1.69 (1.39,2.05)  | 1.67 (1.37,2.04) | <0.01 | 1.70 (1.20,2.41)   | 1.67 (1.17,2.38) | <0.01 |
| 17 | Overweight                    | 3.03 (2.49,3.69)  | 2.43 (1.97,3.00) | <0.01 | 3.01 (2.13,4.24)   | 2.15 (1.50,3.08) | <0.01 |
| 18 | Obese                         | 4.86 (3.97,5.94)  | 3.17 (2.52,3.99) | <0.01 | 5.51 (3.90,7.77)   | 2.97 (2.04,4.34) | <0.01 |
| 19 | Extremely Obese               | 7.90 (5.78,10.79) | 4.64 (3.31,6.52) | <0.01 | 10.62 (7.04,16.01) | 5.24 (3.35,8.19) | <0.01 |
| 20 | <b>Waist Circum.</b>          |                   |                  |       |                    |                  |       |
| 21 | Normal                        | 1.0               | 1.0              |       | 1.0                | 1.0              |       |
| 22 | Not Normal                    | 2.58 (2.38,2.79)  | 1.32 (1.17,1.50) | <0.01 | 3.07 (2.75,3.43)   | 1.53 (1.29,1.81) | <0.01 |
| 23 | <b>Waist to hip ratio</b>     |                   |                  |       |                    |                  |       |
| 24 | Normal                        | 1.0               | 1.0              |       | 1.0                | 1.0              |       |
| 25 | Not Normal                    | 1.99 (1.81,2.20)  | 1.27 (1.13,1.43) | <0.01 | 2.18 (1.93,2.45)   | 1.19 (1.02,1.38) | 0.02  |

Waist Circumference: (men<94, women <80), Waist to hip ratio: (men<0.95, women <0.80), AOR: Adjusted OR.



**Supp. 2. The percentage and determinants of elevated BP according to 2017 ACC/AHA Guideline among Saudi Biobank, 2017-2020 (n = 10799)**

| Characteristics              | Elevated BP according to 2017 ACC/AHA Guideline |                  |                  |         |
|------------------------------|-------------------------------------------------|------------------|------------------|---------|
|                              | Percentage (95% CI)                             | OR (95% CI)      | AOR (95% CI)     | P-value |
| Overall                      | 15.82 (15.69,15.94)                             | -                | -                | -       |
| <b>Gender</b>                |                                                 |                  |                  |         |
| Women                        | 14.07 (13.90,14.24)                             | 1.0              | 1.0              |         |
| Men                          | 17.50 (17.32,17.68)                             | 1.29 (1.17,1.44) | 1.35 (1.19,1.54) | <0.01   |
| <b>Age, years</b>            |                                                 |                  |                  |         |
| 18-29                        | 17.64 (17.47,17.82)                             | 1.0              | 1.0              |         |
| 30-39                        | 13.95 (13.73,14.17)                             | 0.76 (0.67,0.85) | 0.76 (0.66,0.88) | <0.01   |
| 40-49                        | 12.83 (12.47,13.18)                             | 0.69 (0.57,0.83) | 0.71 (0.58,0.87) | <0.01   |
| 50-59                        | 11.35 (10.73,11.98)                             | 0.60 (0.42,0.85) | 0.62 (0.43,0.89) | <0.01   |
| ≥60                          | 10.39 (9.15,11.63)                              | 0.54 (0.26,1.13) | 0.54 (0.26,1.15) | 0.08    |
| <b>Time sitting at work</b>  |                                                 |                  |                  |         |
| Never                        | 8.02 (7.12,8.92)                                | 1.0              | 1.0              |         |
| A few times                  | 15.80 (15.53,16.07)                             | 2.15 (1.08,4.30) | 2.39 (1.19,4.77) | 0.02    |
| Sometimes                    | 16.41 (16.17,16.65)                             | 2.25 (1.13,4.48) | 2.59 (1.30,5.17) | 0.01    |
| Most of the times            | 15.66(15.47,15.84)                              | 2.13 (1.07,4.23) | 2.34 (1.17,4.66) | 0.03    |
| All the times                | 15.44 (14.70,16.17)                             | 2.10 (0.99,4.42) | 2.10 (0.99,4.44) | 0.08    |
| <b>Current smoker</b>        |                                                 |                  |                  |         |
| No                           | 15.62 (15.48,15.75)                             | 1.0              | 1.0              |         |
| Yes                          | 16.80 (16.49,17.12)                             | 1.09 (0.95,1.25) | 0.97 (0.83,1.12) | 0.72    |
| <b>Diabetes</b>              |                                                 |                  |                  |         |
| No                           | 15.76 (15.60,15.92)                             | 1.0              | 1.0              |         |
| Yes                          | 15.91 (15.71,16.11)                             | 0.99 (0.89,1.10) | 1.03 (0.93,1.15) | 0.61    |
| <b>BMI, kg/m<sup>2</sup></b> |                                                 |                  |                  |         |
| Underweight                  | 12.14 (11.69,12.59)                             | 1.0              | 1.0              |         |
| Normal weight                | 16.30 (16.10,16.50)                             | 1.41 (1.10,1.80) | 1.48 (1.16,1.89) | <0.01   |
| Overweight                   | 16.47 (16.23,16.70)                             | 1.43 (1.11,1.83) | 1.64 (1.27,2.12) | <0.01   |
| Obese                        | 15.30 (15.04,15.56)                             | 1.31 (1.01,1.69) | 1.68 (1.26,2.24) | <0.01   |
| Extremely Obese              | 14.41 (13.65,15.16)                             | 1.22 (0.81,1.83) | 1.54 (1.00,2.37) | 0.04    |
| <b>Waist Circum. (cm)</b>    |                                                 |                  |                  |         |
| Normal                       | 16.36 (16.20,16.52)                             | 1.0              | 1.0              |         |
| Not Normal                   | 14.83 (14.62,15.03)                             | 0.89 (0.80,0.99) | 0.91 (0.77,1.07) | 0.21    |
| <b>WtHR</b>                  |                                                 |                  |                  |         |
| Normal                       | 16.27 (16.12,16.41)                             | 1.0              | 1.0              |         |
| Not Normal                   | 13.89 (13.62,14.17)                             | 0.83 (0.72,0.95) | 0.99 (0.84,1.16) | 0.93    |

Waist Circumference: (men<94, women <80), WtHR (Waist to hip ratio): (men<0.95, women <0.80), AOR: Adjusted OR, SR: Saudi Riyals.

**Supp. 3. Sociodemographic and lifestyle characteristics of the Saudi Biobank, 2017-2020**

| Characteristics              | Total (n=10799) |        | Men (n=5497) |        | Women (n=5302) |        |
|------------------------------|-----------------|--------|--------------|--------|----------------|--------|
|                              | n               | %      | n            | %      | n              | %      |
| <b>Age, years</b>            |                 |        |              |        |                |        |
| <b>Mean (SD)</b>             | 30.05           | (8.85) | 29.78        | (8.52) | 30.34          | (9.18) |
| 18-29                        | 6110            | 56.58  | 3189         | 58.01  | 2921           | 55.09  |
| 30-39                        | 3140            | 29.08  | 1612         | 29.33  | 1528           | 28.82  |
| 40-49                        | 1146            | 10.61  | 517          | 9.41   | 629            | 11.86  |
| 50-59                        | 326             | 3.02   | 138          | 2.51   | 188            | 3.55   |
| ≥60                          | 77              | 0.71   | 41           | 0.75   | 36             | 0.68   |
| <b>Marital status</b>        |                 |        |              |        |                |        |
| Never married                | 5874            | 54.39  | 3118         | 56.72  | 2756           | 51.98  |
| Married                      | 4587            | 42.48  | 2293         | 41.71  | 2294           | 43.27  |
| Divorced                     | 270             | 2.50   | 49           | 0.89   | 221            | 4.17   |
| Missing                      | 68              | 0.63   | 37           | 0.67   | 31             | 0.58   |
| <b>Employment</b>            |                 |        |              |        |                |        |
| Employed                     | 5453            | 50.50  | 3852         | 70.07  | 1601           | 30.20  |
| Unemployed                   | 960             | 8.89   | 184          | 3.35   | 776            | 14.64  |
| Student                      | 2950            | 27.32  | 1201         | 21.85  | 1749           | 32.99  |
| Retired/others               | 1307            | 12.10  | 155          | 2.82   | 1152           | 21.73  |
| Missing                      | 129             | 1.19   | 105          | 1.91   | 24             | 0.45   |
| <b>Family income, SAR</b>    |                 |        |              |        |                |        |
| ≤5000                        | 3487            | 32.29  | 1231         | 22.39  | 2256           | 42.55  |
| 5001 - 10,000                | 2371            | 21.96  | 1849         | 33.64  | 522            | 9.85   |
| 1,0001 - 15,000              | 1006            | 9.32   | 675          | 12.28  | 331            | 6.24   |
| 15,001 – 20,000              | 413             | 3.82   | 276          | 5.02   | 137            | 2.58   |
| >20,000                      | 221             | 2.05   | 176          | 3.20   | 45             | 0.85   |
| Missing                      | 3301            | 30.57  | 1290         | 23.47  | 2011           | 37.93  |
| <b>Education level</b>       |                 |        |              |        |                |        |
| < Primary school             | 119             | 1.10   | 23           | 0.42   | 96             | 1.81   |
| Primary school               | 235             | 2.18   | 55           | 1.00   | 180            | 3.39   |
| Intermediate school          | 372             | 3.44   | 154          | 2.80   | 218            | 4.11   |
| High school                  | 4557            | 42.20  | 2752         | 50.06  | 1805           | 34.04  |
| Some college                 | 759             | 7.03   | 591          | 10.75  | 168            | 3.17   |
| Bachelor's degree            | 4346            | 40.24  | 1738         | 31.62  | 2608           | 49.19  |
| Higher education             | 345             | 3.19   | 137          | 2.49   | 208            | 3.92   |
| Missing                      | 66              | 0.61   | 47           | 0.86   | 19             | 0.36   |
| <b>BMI, kg/m<sup>2</sup></b> |                 |        |              |        |                |        |

|    |                                                   |        |         |        |         |        |         |
|----|---------------------------------------------------|--------|---------|--------|---------|--------|---------|
| 1  |                                                   |        |         |        |         |        |         |
| 2  |                                                   |        |         |        |         |        |         |
| 3  | Underweight                                       | 683    | 6.32    | 343    | 6.24    | 340    | 6.41    |
| 4  | Normal weight                                     | 4206   | 38.99   | 2108   | 38.35   | 2098   | 39.57   |
| 5  | Overweight                                        | 3235   | 29.99   | 1741   | 31.67   | 1494   | 28.18   |
| 6  | Obese                                             | 2386   | 22.12   | 1165   | 21.19   | 1221   | 23.03   |
| 7  | Extremely obese                                   | 277    | 2.57    | 132    | 2.40    | 145    | 2.73    |
| 8  | Missing                                           | 12     | 0.11    | 4      | 0.08    | 8      | 0.15    |
| 9  | <b>Tobacco use</b>                                |        |         |        |         |        |         |
| 10 | Yes                                               | 1756   | 16.26   | 1690   | 30.74   | 66     | 1.24    |
| 11 | Missing                                           | 232    | 2.15    | 182    | 3.31    | 50     | 0.94    |
| 12 | <b>Vigorous exercise, week</b>                    |        |         |        |         |        |         |
| 13 | Never                                             | 7635   | 70.70   | 3168   | 57.63   | 4467   | 84.25   |
| 14 | Once                                              | 744    | 6.89    | 571    | 10.39   | 173    | 3.26    |
| 15 | 2-3                                               | 944    | 8.74    | 615    | 11.19   | 329    | 6.21    |
| 16 | 4-5                                               | 740    | 6.85    | 556    | 10.11   | 184    | 3.47    |
| 17 | >5                                                | 541    | 5.01    | 423    | 7.70    | 118    | 2.23    |
| 18 | Missing                                           | 195    | 1.81    | 164    | 2.98    | 31     | 0.58    |
| 19 | <b>Time spent standing, week</b>                  |        |         |        |         |        |         |
| 20 | Never                                             | 198    | 1.83    | 138    | 2.51    | 60     | 1.13    |
| 21 | A few times                                       | 4098   | 37.95   | 1998   | 36.35   | 2100   | 39.61   |
| 22 | Sometimes                                         | 4261   | 39.46   | 1997   | 36.33   | 2264   | 42.70   |
| 23 | Most of the times                                 | 1864   | 17.26   | 1045   | 19.01   | 819    | 15.45   |
| 24 | All the times                                     | 131    | 1.21    | 114    | 2.07    | 17     | 0.32    |
| 25 | Missing                                           | 247    | 2.29    | 205    | 3.73    | 42     | 0.79    |
| 26 | <b>Waist circum., cm</b>                          |        |         |        |         |        |         |
| 27 | <b>mean (SD)</b>                                  | 82.39  | (16.09) | 88.52  | (15.12) | 76.01  | (14.51) |
| 28 | Missing                                           | 105    | 0.97    | 43     | 0.78    | 62     | 1.17    |
| 29 | <b>Waist to hip ratio</b>                         |        |         |        |         |        |         |
| 30 | <b>mean (SD)</b>                                  | 0.81   | (0.10)  | 0.87   | (0.08)  | 0.75   | (0.09)  |
| 31 | Missing                                           | 112    | 1.04    | 45     | 0.82    | 67     | 1.26    |
| 32 | <b>Diabetes History</b>                           |        |         |        |         |        |         |
| 33 | Yes                                               | 659    | 6.10    | 336    | 6.11    | 323    | 6.09    |
| 34 | <b>Blood pressure, mmHg</b>                       |        |         |        |         |        |         |
| 35 | Systolic blood pressure                           | 120.73 | 15.01   | 123.97 | 15.24   | 117.37 | 14.01   |
| 36 | Diastolic blood pressure                          | 75.24  | 10.70   | 76.46  | 10.70   | 73.97  | 10.56   |
| 37 | SD: Standard Deviation, SAR: Saudi Arabian Riyals |        |         |        |         |        |         |
| 38 |                                                   |        |         |        |         |        |         |
| 39 |                                                   |        |         |        |         |        |         |
| 40 |                                                   |        |         |        |         |        |         |
| 41 |                                                   |        |         |        |         |        |         |
| 42 |                                                   |        |         |        |         |        |         |
| 43 |                                                   |        |         |        |         |        |         |
| 44 |                                                   |        |         |        |         |        |         |
| 45 |                                                   |        |         |        |         |        |         |
| 46 |                                                   |        |         |        |         |        |         |
| 47 |                                                   |        |         |        |         |        |         |

# Reporting checklist for cross sectional study.

Based on the STROBE cross sectional guidelines.

## Instructions to authors

Complete this checklist by entering the page numbers from your manuscript where readers will find each of the items listed below.

Your article may not currently address all the items on the checklist. Please modify your text to include the missing information. If you are certain that an item does not apply, please write "n/a" and provide a short explanation.

Upload your completed checklist as an extra file when you submit to a journal.

In your methods section, say that you used the STROBE cross sectional reporting guidelines, and cite them as:

von Elm E, Altman DG, Egger M, Pocock SJ, Gotsche PC, Vandembroucke JP. The Strengthening the Reporting of Observational Studies in Epidemiology (STROBE) Statement: guidelines for reporting observational studies.

|  | Reporting Item                                                                                         | Page Number |
|--|--------------------------------------------------------------------------------------------------------|-------------|
|  | <b>Title and abstract</b>                                                                              |             |
|  | <b>Title</b>                                                                                           |             |
|  | <a href="#">#1a</a> Indicate the study's design with a commonly used term in the title or the abstract | 1           |

|    |                     |                     |                                |           |
|----|---------------------|---------------------|--------------------------------|-----------|
| 1  | Abstract            | <a href="#">#1b</a> | Provide in the abstract an     | 2,3       |
| 2  |                     |                     | informative and balanced       |           |
| 3  |                     |                     | summary of what was done       |           |
| 4  |                     |                     | and what was found             |           |
| 5  |                     |                     |                                |           |
| 6  |                     |                     |                                |           |
| 7  |                     |                     |                                |           |
| 8  |                     |                     |                                |           |
| 9  |                     |                     |                                |           |
| 10 |                     |                     |                                |           |
| 11 | <b>Introduction</b> |                     |                                |           |
| 12 |                     |                     |                                |           |
| 13 |                     |                     |                                |           |
| 14 | Background /        | <a href="#">#2</a>  | Explain the scientific         | 3,4       |
| 15 | rationale           |                     | background and rationale for   |           |
| 16 |                     |                     | the investigation being        |           |
| 17 |                     |                     | reported                       |           |
| 18 |                     |                     |                                |           |
| 19 |                     |                     |                                |           |
| 20 |                     |                     |                                |           |
| 21 |                     |                     |                                |           |
| 22 |                     |                     |                                |           |
| 23 |                     |                     |                                |           |
| 24 | Objectives          | <a href="#">#3</a>  | State specific objectives,     | 4         |
| 25 |                     |                     | including any prespecified     |           |
| 26 |                     |                     | hypotheses                     |           |
| 27 |                     |                     |                                |           |
| 28 |                     |                     |                                |           |
| 29 |                     |                     |                                |           |
| 30 |                     |                     |                                |           |
| 31 |                     |                     |                                |           |
| 32 | <b>Methods</b>      |                     |                                |           |
| 33 |                     |                     |                                |           |
| 34 |                     |                     |                                |           |
| 35 | Study design        | <a href="#">#4</a>  | Present key elements of        | 5         |
| 36 |                     |                     | study design early in the      |           |
| 37 |                     |                     | paper                          |           |
| 38 |                     |                     |                                |           |
| 39 |                     |                     |                                |           |
| 40 |                     |                     |                                |           |
| 41 |                     |                     |                                |           |
| 42 | Setting             | <a href="#">#5</a>  | Describe the setting,          | 5,6,7,8,9 |
| 43 |                     |                     | locations, and relevant dates, |           |
| 44 |                     |                     | including periods of           |           |
| 45 |                     |                     | recruitment, exposure, follow- |           |
| 46 |                     |                     | up, and data collection        |           |
| 47 |                     |                     |                                |           |
| 48 |                     |                     |                                |           |
| 49 |                     |                     |                                |           |
| 50 |                     |                     |                                |           |
| 51 |                     |                     |                                |           |
| 52 |                     |                     |                                |           |
| 53 |                     |                     |                                |           |
| 54 |                     |                     |                                |           |
| 55 |                     |                     |                                |           |
| 56 |                     |                     |                                |           |
| 57 |                     |                     |                                |           |
| 58 |                     |                     |                                |           |
| 59 |                     |                     |                                |           |
| 60 |                     |                     |                                |           |

|    |                      |                     |                                    |           |
|----|----------------------|---------------------|------------------------------------|-----------|
| 1  | Eligibility criteria | <a href="#">#6a</a> | Give the eligibility criteria, and | 9         |
| 2  |                      |                     |                                    |           |
| 3  |                      |                     | the sources and methods of         |           |
| 4  |                      |                     | selection of participants.         |           |
| 5  |                      |                     |                                    |           |
| 6  |                      |                     |                                    |           |
| 7  |                      |                     |                                    |           |
| 8  |                      |                     |                                    |           |
| 9  |                      | <a href="#">#7</a>  | Clearly define all outcomes,       | 5,6,7,8   |
| 10 |                      |                     | exposures, predictors,             |           |
| 11 |                      |                     | potential confounders, and         |           |
| 12 |                      |                     | effect modifiers. Give             |           |
| 13 |                      |                     | diagnostic criteria, if            |           |
| 14 |                      |                     | applicable                         |           |
| 15 |                      |                     |                                    |           |
| 16 |                      |                     |                                    |           |
| 17 |                      |                     |                                    |           |
| 18 |                      |                     |                                    |           |
| 19 |                      |                     |                                    |           |
| 20 |                      |                     |                                    |           |
| 21 |                      |                     |                                    |           |
| 22 |                      |                     |                                    |           |
| 23 | Data sources /       | <a href="#">#8</a>  | For each variable of interest      | 5,6,7,8   |
| 24 | measurement          |                     | give sources of data and           |           |
| 25 |                      |                     | details of methods of              |           |
| 26 |                      |                     | assessment (measurement).          |           |
| 27 |                      |                     | Describe comparability of          |           |
| 28 |                      |                     | assessment methods if there        |           |
| 29 |                      |                     | is more than one group. Give       |           |
| 30 |                      |                     | information separately for for     |           |
| 31 |                      |                     | exposed and unexposed              |           |
| 32 |                      |                     | groups if applicable.              |           |
| 33 |                      |                     |                                    |           |
| 34 |                      |                     |                                    |           |
| 35 |                      |                     |                                    |           |
| 36 |                      |                     |                                    |           |
| 37 |                      |                     |                                    |           |
| 38 |                      |                     |                                    |           |
| 39 |                      |                     |                                    |           |
| 40 |                      |                     |                                    |           |
| 41 |                      |                     |                                    |           |
| 42 |                      |                     |                                    |           |
| 43 |                      |                     |                                    |           |
| 44 |                      |                     |                                    |           |
| 45 |                      |                     |                                    |           |
| 46 |                      |                     |                                    |           |
| 47 | Bias                 | <a href="#">#9</a>  | Describe any efforts to            | 5,6,7,8,9 |
| 48 |                      |                     | address potential sources of       |           |
| 49 |                      |                     | bias                               |           |
| 50 |                      |                     |                                    |           |
| 51 |                      |                     |                                    |           |
| 52 |                      |                     |                                    |           |
| 53 |                      |                     |                                    |           |
| 54 | Study size           | <a href="#">#10</a> | Explain how the study size         | 9         |
| 55 |                      |                     | was arrived at                     |           |
| 56 |                      |                     |                                    |           |
| 57 |                      |                     |                                    |           |
| 58 |                      |                     |                                    |           |
| 59 |                      |                     |                                    |           |
| 60 |                      |                     |                                    |           |

|    |                |                      |                               |     |
|----|----------------|----------------------|-------------------------------|-----|
| 1  | Quantitative   | <a href="#">#11</a>  | Explain how quantitative      | 8,9 |
| 2  |                |                      |                               |     |
| 3  | variables      |                      | variables were handled in the |     |
| 4  |                |                      |                               |     |
| 5  |                |                      | analyses. If applicable,      |     |
| 6  |                |                      |                               |     |
| 7  |                |                      | describe which groupings      |     |
| 8  |                |                      |                               |     |
| 9  |                |                      | were chosen, and why          |     |
| 10 |                |                      |                               |     |
| 11 |                |                      |                               |     |
| 12 |                |                      |                               |     |
| 13 | Statistical    | <a href="#">#12a</a> | Describe all statistical      | 8,9 |
| 14 |                |                      |                               |     |
| 15 | methods        |                      | methods, including those      |     |
| 16 |                |                      |                               |     |
| 17 |                |                      | used to control for           |     |
| 18 |                |                      |                               |     |
| 19 |                |                      | confounding                   |     |
| 20 |                |                      |                               |     |
| 21 |                |                      |                               |     |
| 22 |                |                      |                               |     |
| 23 | Statistical    | <a href="#">#12b</a> | Describe any methods used     | 8,9 |
| 24 |                |                      |                               |     |
| 25 | methods        |                      | to examine subgroups and      |     |
| 26 |                |                      |                               |     |
| 27 |                |                      | interactions                  |     |
| 28 |                |                      |                               |     |
| 29 |                |                      |                               |     |
| 30 |                |                      |                               |     |
| 31 | Statistical    | <a href="#">#12c</a> | Explain how missing data      | 9   |
| 32 |                |                      |                               |     |
| 33 | methods        |                      | were addressed                |     |
| 34 |                |                      |                               |     |
| 35 |                |                      |                               |     |
| 36 | Statistical    | <a href="#">#12d</a> | If applicable, describe       | n/a |
| 37 |                |                      |                               |     |
| 38 | methods        |                      | analytical methods taking     |     |
| 39 |                |                      |                               |     |
| 40 |                |                      | account of sampling strategy  |     |
| 41 |                |                      |                               |     |
| 42 |                |                      |                               |     |
| 43 |                |                      |                               |     |
| 44 | Statistical    | <a href="#">#12e</a> | Describe any sensitivity      | 9   |
| 45 |                |                      |                               |     |
| 46 | methods        |                      | analyses                      |     |
| 47 |                |                      |                               |     |
| 48 |                |                      |                               |     |
| 49 | <b>Results</b> |                      |                               |     |
| 50 |                |                      |                               |     |
| 51 |                |                      |                               |     |
| 52 | Participants   | <a href="#">#13a</a> | Report numbers of individuals | 9   |
| 53 |                |                      |                               |     |
| 54 |                |                      | at each stage of study—eg     |     |
| 55 |                |                      |                               |     |
| 56 |                |                      | numbers potentially eligible, |     |
| 57 |                |                      |                               |     |
| 58 |                |                      |                               |     |
| 59 |                |                      |                               |     |
| 60 |                |                      |                               |     |

|    |                  |                                                    |                                          |
|----|------------------|----------------------------------------------------|------------------------------------------|
| 1  |                  | examined for eligibility,                          |                                          |
| 2  |                  | confirmed eligible, included in                    |                                          |
| 3  |                  | the study, completing follow-                      |                                          |
| 4  |                  | up, and analysed. Give                             |                                          |
| 5  |                  | information separately for for                     |                                          |
| 6  |                  | exposed and unexposed                              |                                          |
| 7  |                  | groups if applicable.                              |                                          |
| 8  |                  |                                                    |                                          |
| 9  |                  |                                                    |                                          |
| 10 |                  |                                                    |                                          |
| 11 |                  |                                                    |                                          |
| 12 |                  |                                                    |                                          |
| 13 |                  |                                                    |                                          |
| 14 |                  |                                                    |                                          |
| 15 |                  |                                                    |                                          |
| 16 |                  |                                                    |                                          |
| 17 | Participants     | <a href="#">#13b</a> Give reasons for non-         | 9                                        |
| 18 |                  | participation at each stage                        |                                          |
| 19 |                  |                                                    |                                          |
| 20 |                  |                                                    |                                          |
| 21 |                  |                                                    |                                          |
| 22 | Participants     | <a href="#">#13c</a> Consider use of a flow        | n/a                                      |
| 23 |                  | diagram                                            |                                          |
| 24 |                  |                                                    |                                          |
| 25 |                  |                                                    |                                          |
| 26 |                  |                                                    |                                          |
| 27 |                  |                                                    |                                          |
| 28 | Descriptive data | <a href="#">#14a</a> Give characteristics of study | 9,10,11,12,13,25,26,27,28,29,30,31,32,33 |
| 29 |                  | participants (eg demographic,                      |                                          |
| 30 |                  | clinical, social) and                              |                                          |
| 31 |                  | information on exposures and                       |                                          |
| 32 |                  | potential confounders. Give                        |                                          |
| 33 |                  | information separately for                         |                                          |
| 34 |                  | exposed and unexposed                              |                                          |
| 35 |                  | groups if applicable.                              |                                          |
| 36 |                  |                                                    |                                          |
| 37 |                  |                                                    |                                          |
| 38 |                  |                                                    |                                          |
| 39 |                  |                                                    |                                          |
| 40 |                  |                                                    |                                          |
| 41 |                  |                                                    |                                          |
| 42 |                  |                                                    |                                          |
| 43 |                  |                                                    |                                          |
| 44 |                  |                                                    |                                          |
| 45 |                  |                                                    |                                          |
| 46 |                  |                                                    |                                          |
| 47 | Descriptive data | <a href="#">#14b</a> Indicate number of            | 25,26,27,28                              |
| 48 |                  | participants with missing data                     |                                          |
| 49 |                  | for each variable of interest                      |                                          |
| 50 |                  |                                                    |                                          |
| 51 |                  |                                                    |                                          |
| 52 |                  |                                                    |                                          |
| 53 |                  |                                                    |                                          |
| 54 | Outcome data     | <a href="#">#15</a> Report numbers of outcome      | 30,31,32,33                              |
| 55 |                  | events or summary                                  |                                          |
| 56 |                  |                                                    |                                          |
| 57 |                  |                                                    |                                          |
| 58 |                  |                                                    |                                          |
| 59 |                  |                                                    |                                          |
| 60 |                  |                                                    |                                          |



measures. Give information separately for exposed and unexposed groups if applicable.

|    |                |                                                 |                           |
|----|----------------|-------------------------------------------------|---------------------------|
| 1  |                |                                                 |                           |
| 2  |                |                                                 |                           |
| 3  |                |                                                 |                           |
| 4  |                |                                                 |                           |
| 5  |                |                                                 |                           |
| 6  |                |                                                 |                           |
| 7  |                |                                                 |                           |
| 8  |                |                                                 |                           |
| 9  |                |                                                 |                           |
| 10 | Main results   | <a href="#">#16a</a> Give unadjusted estimates  | 11,12                     |
| 11 |                |                                                 |                           |
| 12 |                | and, if applicable,                             |                           |
| 13 |                |                                                 |                           |
| 14 |                | confounder-adjusted                             |                           |
| 15 |                | estimates and their precision                   |                           |
| 16 |                | (eg, 95% confidence interval).                  |                           |
| 17 |                | Make clear which                                |                           |
| 18 |                | confounders were adjusted                       |                           |
| 19 |                | for and why they were                           |                           |
| 20 |                | included                                        |                           |
| 21 |                |                                                 |                           |
| 22 |                |                                                 |                           |
| 23 |                |                                                 |                           |
| 24 |                |                                                 |                           |
| 25 |                |                                                 |                           |
| 26 |                |                                                 |                           |
| 27 |                |                                                 |                           |
| 28 |                |                                                 |                           |
| 29 |                |                                                 |                           |
| 30 |                |                                                 |                           |
| 31 | Main results   | <a href="#">#16b</a> Report category boundaries | 10,11,29                  |
| 32 |                | when continuous variables                       |                           |
| 33 |                | were categorized                                |                           |
| 34 |                |                                                 |                           |
| 35 |                |                                                 |                           |
| 36 |                |                                                 |                           |
| 37 |                |                                                 |                           |
| 38 |                |                                                 |                           |
| 39 | Main results   | <a href="#">#16c</a> If relevant, consider      | n/a                       |
| 40 |                | translating estimates of                        |                           |
| 41 |                | relative risk into absolute risk                |                           |
| 42 |                | for a meaningful time period                    |                           |
| 43 |                |                                                 |                           |
| 44 |                |                                                 |                           |
| 45 |                |                                                 |                           |
| 46 |                |                                                 |                           |
| 47 |                |                                                 |                           |
| 48 |                |                                                 |                           |
| 49 | Other analyses | <a href="#">#17</a> Report other analyses done— | 9,10,11,13,17,30,31,32,33 |
| 50 |                | e.g., analyses of subgroups                     |                           |
| 51 |                | and interactions, and                           |                           |
| 52 |                | sensitivity analyses                            |                           |
| 53 |                |                                                 |                           |
| 54 |                |                                                 |                           |
| 55 |                |                                                 |                           |
| 56 |                |                                                 |                           |
| 57 |                |                                                 |                           |
| 58 |                |                                                 |                           |
| 59 |                |                                                 |                           |
| 60 |                |                                                 |                           |

## Discussion

Key results [#18](#) Summarise key results with reference to study objectives 14,15,16

Limitations [#19](#) Discuss limitations of the study, taking into account sources of potential bias or imprecision. Discuss both direction and magnitude of any potential bias. 17

Interpretation [#20](#) Give a cautious overall interpretation considering objectives, limitations, multiplicity of analyses, results from similar studies, and other relevant evidence. 14,15,16

Generalisability [#21](#) Discuss the generalisability (external validity) of the study results 17

## Other

### Information

Funding [#22](#) Give the source of funding and the role of the funders for the present study and, if

1 applicable, for the original  
2  
3 study on which the present  
4  
5 article is based  
6  
7

8 Notes:  
9

- 10  
11 • 14a: 9,10,11,12,13,25,26,27,28,29,30,31,32,33  
12  
13  
14 • 14b: 25,26,27,28  
15  
16  
17 • 15: 30,31,32,33  
18  
19  
20 • 17: 9,10,11,13,17,30,31,32,33 The STROBE checklist is distributed under the terms of the  
21 Creative Commons Attribution License CC-BY. This checklist was completed on 19. June 2020  
22 using <https://www.goodreports.org/>, a tool made by the [EQUATOR Network](#) in collaboration with  
23 [Penelope.ai](#)  
24  
25  
26  
27  
28  
29  
30  
31  
32  
33  
34  
35  
36  
37  
38  
39  
40  
41  
42  
43  
44  
45  
46  
47  
48  
49  
50  
51  
52  
53  
54  
55  
56  
57  
58  
59  
60

# BMJ Open

## The impact of the 2017 ACC/AHA guideline on the prevalence of elevated blood pressure and hypertension: a cross-sectional analysis of 10799 individuals.

|                                 |                                                                                                                                                                                                                                                                                                                                                                                                                                                                                                                                                                                                                                                           |
|---------------------------------|-----------------------------------------------------------------------------------------------------------------------------------------------------------------------------------------------------------------------------------------------------------------------------------------------------------------------------------------------------------------------------------------------------------------------------------------------------------------------------------------------------------------------------------------------------------------------------------------------------------------------------------------------------------|
| Journal:                        | <i>BMJ Open</i>                                                                                                                                                                                                                                                                                                                                                                                                                                                                                                                                                                                                                                           |
| Manuscript ID                   | bmjopen-2020-041973.R2                                                                                                                                                                                                                                                                                                                                                                                                                                                                                                                                                                                                                                    |
| Article Type:                   | Original research                                                                                                                                                                                                                                                                                                                                                                                                                                                                                                                                                                                                                                         |
| Date Submitted by the Author:   | 26-Nov-2020                                                                                                                                                                                                                                                                                                                                                                                                                                                                                                                                                                                                                                               |
| Complete List of Authors:       | Alyabsi, Mesnad; King Abdullah International Medical Research Center, Population Health Research Section; King Saud bin Abdulaziz University for Health Sciences, Gaid, Reham; Princess Noura Bint AbdulRahman University Alqunaiabet, Ada; King Abdullah International Medical Research Center Alaskar, Ahmed; King Abdullah International Medical Research Center; King Saud bin Abdulaziz University for Health Sciences Mahmud, Azra; King Abdulaziz Cardiac Center; King Abdullah International Medical Research Center Alghamdi, Jahad; King Abdullah International Medical Research Center; King Saud bin Abdulaziz University for Health Sciences |
| <b>Primary Subject Heading</b>: | Evidence based practice                                                                                                                                                                                                                                                                                                                                                                                                                                                                                                                                                                                                                                   |
| Secondary Subject Heading:      | Evidence based practice                                                                                                                                                                                                                                                                                                                                                                                                                                                                                                                                                                                                                                   |
| Keywords:                       | Hypertension < CARDIOLOGY, Protocols & guidelines < HEALTH SERVICES ADMINISTRATION & MANAGEMENT, EPIDEMIOLOGY                                                                                                                                                                                                                                                                                                                                                                                                                                                                                                                                             |
|                                 |                                                                                                                                                                                                                                                                                                                                                                                                                                                                                                                                                                                                                                                           |

SCHOLARONE™  
Manuscripts



I, the Submitting Author has the right to grant and does grant on behalf of all authors of the Work (as defined in the below author licence), an exclusive licence and/or a non-exclusive licence for contributions from authors who are: i) UK Crown employees; ii) where BMJ has agreed a CC-BY licence shall apply, and/or iii) in accordance with the terms applicable for US Federal Government officers or employees acting as part of their official duties; on a worldwide, perpetual, irrevocable, royalty-free basis to BMJ Publishing Group Ltd ("BMJ") its licensees and where the relevant Journal is co-owned by BMJ to the co-owners of the Journal, to publish the Work in this journal and any other BMJ products and to exploit all rights, as set out in our [licence](#).

The Submitting Author accepts and understands that any supply made under these terms is made by BMJ to the Submitting Author unless you are acting as an employee on behalf of your employer or a postgraduate student of an affiliated institution which is paying any applicable article publishing charge ("APC") for Open Access articles. Where the Submitting Author wishes to make the Work available on an Open Access basis (and intends to pay the relevant APC), the terms of reuse of such Open Access shall be governed by a Creative Commons licence – details of these licences and which [Creative Commons](#) licence will apply to this Work are set out in our licence referred to above.

Other than as permitted in any relevant BMJ Author's Self Archiving Policies, I confirm this Work has not been accepted for publication elsewhere, is not being considered for publication elsewhere and does not duplicate material already published. I confirm all authors consent to publication of this Work and authorise the granting of this licence.

# The impact of the 2017 ACC/AHA guideline on the prevalence of elevated blood pressure and hypertension: a cross-sectional analysis of 10799 individuals

Mesnad Alyabsi<sup>1,2</sup>, Reham Gaid<sup>1,3</sup>, Ada Alqunaibet<sup>6</sup>, Ahmed Alaskar<sup>2,4,5</sup>, Azra

Mahmud<sup>2,5,7</sup>, Jihad Alghamdi<sup>2,4,5</sup>

<sup>1</sup>Population Health Research Section, King Abdullah International Medical Research Center, Riyadh, Saudi Arabia; P.O. Box 22490, Riyadh 11426.

<sup>2</sup>King Saud bin Abdulaziz University for Health Sciences, Riyadh, Saudi Arabia; P.O. Box 22490, Riyadh 11426.

<sup>3</sup>Princess Nourah Bint Abdulrahman University, Health, and Rehabilitation Sciences College, Riyadh, Saudi Arabia; P.O. Box 84428, Riyadh 11671.

<sup>4</sup>The Saudi Biobank, King Abdullah International Medical Research Center (KAIMRC), Riyadh, Saudi Arabia.

<sup>5</sup>King Abdullah International Medical Research Center, Riyadh, Saudi Arabia; P.O. Box 22490, Riyadh 11426.

<sup>6</sup>Saudi Center for Disease Prevention and Control, Riyadh, Saudi Arabia.

<sup>7</sup>King Abdulaziz Cardiac Center, King Abdulaziz Medical City, MNGHA, Riyadh

**Corresponding author:** Mesnad Alyabsi, P.O. Box 3660, Riyadh 11481, Mail Code

1515, Saudi Arabia, Email: mesnadalyabsi@unomaha.edu, Tel: +966(11)429-4326,

FAX: +966(11) 429-4440

**Coauthors:** rehamgaid94@gmail.com; alghamdija@ngha.med.sa; ada\_mq@hotmail.com;

mahmudaz@ngha.med.sa; azramahmud@gmail.com

**(Word Count: 2883)**

## ABSTRACT

**Objectives** To assess the effect of the 2017 ACC/AHA hypertension guideline on the prevalence of elevated blood pressure and hypertension and the initiation of antihypertensive treatment, as well as the level of adherence to the blood pressure (BP) target in the Saudi population.

**Design** A cross-sectional study.

**Participants** A total of 10,799 adults ( $\geq 18$  years old), with three BP readings during 2017-2020 from the Saudi Biobank (SBB) was used.

**Primary outcome** Hypertension was defined using three sources: the JNC-7 guideline (SBP $\geq 140$  or DBP $\geq 90$  mmHg), the 2017 ACC/AHA guideline (SBP $\geq 130$  or DBP $\geq 80$  mmHg), and a self-reported hypertension diagnosis.

**Results** The prevalence of hypertension, according to the JNC-7 guideline, was 14.49% (95% CI: 14.37, 14.61), and the 2017 ACC/AHA, 40.77% (95% CI: 40.60, 40.94), a difference of 26.28 %. Antihypertensive medication was recommended for 24.84% (95% CI: 24.69, 24.98) based on the JNC-7 guideline and 27.67% (95% CI: 27.52, 27.82) using the 2017 ACC/AHA guideline. Lifestyle modification was recommended for 13.10% (95% CI: 12.47, 13.74) of patients with hypertension who were not eligible for a pharmacological intervention, based on the 2017 ACC/AHA guideline. For patients with prescribed antihypertensive medication, 49.56% (95% CI: 45.50, 53.64) and 27.81% (95% CI: 24.31, 31.59) presented with a BP reading above the treatment goal, based on the 2017 ACC/AHA and JNC-7 guidelines, respectively. Using the two definitions, the risk factors were older age, male gender, diabetes diagnosis, increased body mass index (BMI), waist circumference, and waist-to-hip ratio.

**Conclusions** According to the 2017 ACC/AHA guideline, the prevalence of hypertension has increased significantly, but there was only a small increase in the proportion of patients recommended for antihypertensive treatment. A large proportion of patients with prescribed antihypertensive medication, had a BP above the target. Unless public health prevention efforts are adopted, the increased prevalence of elevated blood pressure and hypertension will increase cardiovascular disease.

### Strengths and limitations of this study

- The study had a large sample size.
- We ascertained the hypertensive status using three BP measurements.
- The cross-sectional design limits our ability to assess the temporal relationship between the independent factors and hypertension.
- There was no ambulatory BP data available for the participants.
- The study had a limited geographic variation in terms of the study participants.

**Keywords:** Hypertension; guideline; Saudi Arabia; Prevention; Biobank; Blood pressure, Cardiovascular, Antihypertensive drugs



## INTRODUCTION

Hypertension is the most prevalent risk factor for cardiovascular diseases (CVDs) and the cause of 9.4 million annual preventable deaths globally<sup>1 2</sup>. The global number of patients with hypertension is expected to increase by 319.7 million from 2015 and 2050<sup>3</sup>. The risk factors contributing to the increased prevalence of hypertension are increasing age, male gender, lifestyle factors such as smoking, alcohol consumption, unhealthy diet, sedentary lifestyle, and increased weight<sup>4</sup>. Though the burden of hypertension is substantial, detecting and controlling blood pressure (BP) levels at the elevated BP stage, will reduce the risk and burden of CVDs<sup>5</sup>.

Identifying the optimal BP levels for the definition of elevated blood pressure and hypertension has been controversial<sup>6-9</sup>. Based on evidence from randomized controlled trials (RCTs) and other observational studies, the American College of Cardiology and the American Heart Association (ACC/AHA) developed the Hypertension Practice Guideline in 2017- "The ACC/AHA Guideline for the Prevention, Detection, Evaluation, and Management of High Blood Pressure in Adults"<sup>10</sup>. The guideline lowered the threshold categories of hypertension from  $\geq 140$  mmHg systolic blood pressure (SBP) or  $\geq 90$  mmHg diastolic blood pressure (DBP) to  $\geq 130$  mmHg SBP or  $\geq 80$  mmHg DBP. Elevated blood pressure is now limited to individuals with an SBP of 120-129 mmHg and DBP  $< 80$  mmHg instead of 120-139 mmHg or 80-89 mmHg, as suggested by the Joint National Committee 7 Blood Pressure Guideline (JNC-7)<sup>11</sup>. Although not endorsed by some organizations, the new lower BP categories have been assessed in a systematic review and meta-analysis and were associated with a lower risk of CVDs<sup>12</sup>.

1  
2  
3 Literature from various countries reported the prevalence of hypertension according to the  
4 2017 ACC/AHA guideline<sup>13-18</sup>. Muntner et al.<sup>13</sup> evaluated the effect of the 2017  
5 ACC/AHA guideline on the prevalence of hypertension, and reported an increase of 13.7%  
6 in their adult population. Similarly, Alkibria et al.<sup>14 18</sup> assessed the changes in the  
7 prevalence of hypertension in the population of Nepal (aged  $\geq 15$  years) and Bangladesh  
8 (aged  $\geq 35$  years) and reported an increase of 23% and 22.3%, respectively. Moreover,  
9 Khera et al.<sup>15</sup> found an increase of 26.8% and 45.1% in the 45-75 year population of China  
10 and the U.S., respectively. The estimation of hypertension would essentially update the  
11 burden of CVDs and identify the proportion of hypertensive patients recommended for  
12 lifestyle modifications or antihypertensive medication.  
13  
14  
15  
16  
17  
18  
19  
20  
21  
22  
23  
24  
25

26  
27 According to the latest survey in 2016, Saudi Arabia is a developing country with a total  
28 population of 31 million<sup>19</sup>. Half of the population are younger than 25 years, 35% from 20  
29 to 39 years, and only 3.2% are over 64 years old<sup>19</sup>. Based on the JNC-7 guideline, the  
30 prevalence of hypertension and elevated blood pressure in the Saudi population were  
31 15.2% and 40.6%, respectively<sup>20</sup>. For the patients with an antihypertensive medication  
32 prescription, 55% to 73% had a BP above the JNC-7 guideline targeted level<sup>21 22</sup>.  
33  
34  
35  
36  
37  
38  
39  
40  
41

42 We designed the current study to investigate the effect of the 2017 ACC/AHA guideline  
43 on the prevalence of hypertension and to assess the proportion of hypertensive patients  
44 recommended for lifestyle modification or antihypertensive medication, according to the  
45 2017 ACC/AHA guideline. We also aimed to determine the proportion of patients with  
46 prescribed antihypertensive medication who have a BP above the target recommended by  
47 the 2017 ACC/AHA guideline. As a secondary analysis, we aimed to evaluate the  
48 determinants of elevated BP and hypertension in the Saudi Biobank (SBB) data. The results  
49  
50  
51  
52  
53  
54  
55  
56  
57  
58  
59  
60

1  
2  
3 will be useful for public health officials and healthcare providers to plan and implement  
4 primary, secondary, and tertiary prevention interventions. The objectives of these  
5 interventions are to reduce the burden of hypertension, in addition to the morbidity and  
6 mortality associated with CVDs.  
7  
8  
9  
10  
11

## 12 **MATERIALS AND METHODS**

### 13 **Data sources**

14  
15  
16 The Institutional Review Board of King Abdullah International Medical Research Center  
17 (IRB#139 RC19/028/R) approved the study. The study had a cross-sectional design using  
18 data from the SBB. The SBB is an ongoing project to investigate the current health  
19 behavior of the Saudi population. The project explores the fundamental mechanisms of  
20 diseases by combining bio-specimens and survey data, sociodemographic and medical  
21 history information. The current study used only the survey data available from the SBB.  
22  
23  
24  
25  
26  
27  
28  
29  
30

### 31 **Patient and Public Involvement**

32 No patients involved.  
33  
34  
35

### 36 **Survey development and administration**

37  
38 The SBB research team created a questionnaire based on a previously developed and  
39 validated questionnaire. The questionnaire partly corresponds to projects of other similar  
40 population biobanks to allow comparability between the Saudi population and other  
41 populations. The preliminary questionnaire was pilot tested, and the items revised  
42 according to the findings. The questionnaire includes the following sections: Date and  
43 Location of Recruitment, Demographic Information, Family Information, Housing  
44 Information, General Health Status, Personal and Family Medical History, History of  
45  
46  
47  
48  
49  
50  
51  
52  
53  
54  
55  
56  
57  
58  
59  
60

1  
2  
3 Personal and Family Medications Use, Disabilities, Others, Women and Men Health,  
4 Health Behaviors, Nutrition, Physical Activity, and Anthropometric Measurements.

5  
6  
7  
8 The questionnaire items are primarily closed-ended questions with Likert scale responses.

9  
10 The questionnaire is administered to participants by trained research coordinators. Before  
11 obtaining consent and completing the questionnaire, the coordinators describe the SBB  
12 objectives, the benefits of study participation, the security and privacy of collected  
13 information, voluntary participation, and unconditional withdrawal from the study.  
14  
15  
16  
17  
18

### 19 20 **Study population and data extraction**

21  
22 The study population was adults ( $\geq 18$  years old) who participated in the survey from  
23 December 10th, 2017 to January 29th, 2020, with three recorded BP measurements. The  
24 data related to the prescribed antihypertensive medication were extracted from the  
25 electronic medical records.  
26  
27  
28  
29  
30  
31

### 32 33 **Measurement method for blood pressure**

34  
35 The BP was measured using a calibrated sphygmomanometer and arm cuffs (Omron 705it  
36 or Omron M3). Research coordinators are trained to measure BP once the participants are  
37 rested, with legs uncrossed. The average of the three BP measurements was computed and  
38 used as the final BP reading.  
39  
40  
41  
42  
43  
44

### 45 46 **Blood pressure classification**

47  
48 Using the JNC-7 guideline, BP was categorized into four categories: normal (SBP $<120$  and  
49 DBP $<80$  mmHg), elevated blood pressure (SBP=120-139, or DBP=80-89 mmHg), stage 1  
50 (SBP=140-159 or DBP=90-99 mmHg) and stage 2 (SBP $\geq 160$  or DBP $\geq 100$  mmHg)<sup>11</sup>.  
51  
52  
53  
54

55 Using the ACC/AHA guideline, BP was also categorized into four categories: normal  
56  
57  
58  
59

1  
2  
3 (SBP<120 and DBP<80 mmHg), elevated (SBP=120-129 and DBP<80 mmHg), stage 1  
4  
5 (SBP=130-139 or DBP=80-89 mmHg) and stage 2 (SBP $\geq$ 140 or DBP $\geq$ 90 mmHg)<sup>10</sup>.  
6  
7  
8 Individuals with BP measurements in stage 1 or stage 2 were considered as diagnosed with  
9  
10 hypertension.

### 11 12 13 **Data collection and definitions**

14  
15  
16 The participants' sociodemographic information, including age, gender, marital status,  
17  
18 education level, occupation, and family income, was extracted from the SBB data. In  
19  
20 addition, behavioral health factors such as physical activities, smoking status, including  
21  
22 shisha use, dietary intake, and comorbidities, were retrieved. The waist and hip  
23  
24 circumference, height, and weight measurements were categorized as suggested by Lear et  
25  
26 al.<sup>23</sup> Comorbidities, such as a diagnosis of diabetes mellitus (DM) or any CVD, were self-  
27  
28 reported.  
29  
30  
31

### 32 33 **Prescription data**

34  
35  
36 We used the medical records and pharmacy data to identify participants with an  
37  
38 antihypertensive medication prescription. Based on the 2017 ACC/AHA guideline, we  
39  
40 defined guideline-recommended antihypertensive medication use as patients with a  
41  
42 SBP/DBP of  $\geq$ 140/90 mmHg, for high-risk patients (i.e., DM, CVD, age  $\geq$  65), the cutoff  
43  
44 was 130/80 mmHg. The same applied to the JNC-7 guideline, with the exception that DM  
45  
46 was the only designation of high risk. We identified patients with a diagnosis of  
47  
48 hypertension in their medical file, self-reported hypertension, and at least one prescription  
49  
50 of antihypertensive medication<sup>24</sup>. The antihypertensive drugs used were beta-blockers,  
51  
52 calcium channel blockers, angiotensin-converting enzyme inhibitors, angiotensin receptor  
53  
54  
55  
56  
57  
58  
59  
60

1  
2  
3 blockers, diuretics, and centrally or peripherally acting agents found in the pharmacy files  
4  
5 during the year of diagnosis.  
6  
7

### 8 **Data analysis**

9

10 The data were analyzed using SAS statistical software version 9.4 (SAS Institute Inc. Cary,  
11 NC). Descriptive data for the sample, stratified by gender, are presented as frequency and  
12 percentage for categorical variables, and for continuous variables, as a mean and standard  
13 deviation (SD). In addition, for each BP category, the mean, SD, median, interquartile  
14 range (IQR), minimum, and maximum value was calculated. The prevalence of  
15 hypertension was calculated by dividing the total number of hypertensive individuals by  
16 the total number of the study population. The prevalence of elevated blood pressure was  
17 measured by dividing the total number of the group with elevated blood pressure by the  
18 total number of the study population. The prevalence of hypertension and elevated blood  
19 pressure and the 95% CI was calculated using the Wald binomial method.  
20  
21  
22  
23  
24  
25  
26  
27  
28  
29  
30  
31  
32  
33

34 Missing covariate data were managed by using the multiple imputations by chained  
35 equations (fully conditional method), assuming that data are missing at random (MAR).  
36 The missing data ranges from 0% to 30%, and 30 imputations were conducted. Given the  
37 arbitrary pattern of the missing data, the PROC MI procedure was used with the "FCS  
38 regpmm" statement for continuous variables and the "FCS logistic" for categorical  
39 variables<sup>25</sup>. Univariate and multivariate logistic regressions were conducted using the  
40 multiple imputed data to estimate the odds ratio (OR) and the adjusted odds ratio (AOR).  
41 Backward elimination was used to determine variables included at the multivariate level.  
42  
43  
44  
45  
46  
47  
48  
49  
50  
51  
52  
53 All statistical tests were 2-sided, and findings were considered statistically significant at P  
54  
55  
56  
57  
58  
59  
60

1  
2  
3 < .05. The STROBE cross-sectional guideline was used to assure that all essential elements  
4 are reported and covered<sup>26</sup>.  
5  
6

## 7 8 **RESULTS**

### 9 10 **Descriptive statistics**

11  
12 A total of 11571 individuals were captured in the SBB. After excluding individuals <18  
13 years old (n=327) and with less than three BP readings (n=445), the final sample was 10799  
14 individuals. The overall characteristics of the sample, stratified by antihypertensive  
15 prescription, are summarized in Table 1. From 2017 to 2020, 41.22%, 15.26%, 24.84%,  
16 and 13.32% of the SBB participants who did not have a prescription for antihypertensive  
17 medication, presented with SBP/DBP readings of <120/80 mmHg, 120-129/<80 mmHg,  
18 130-139/80-89 mmHg, and  $\geq$ 140/90 mmHg, respectively. Participants with an increased  
19 BP were likely to be male, of older age, and with a history of DM or CVD.  
20  
21  
22  
23  
24  
25  
26  
27  
28  
29  
30

### 31 **The prevalence of hypertension and the recommended interventions according to the** 32 **2017 ACC/AHA and JNC-7 Guidelines** 33

34  
35 As shown in Table 2, the prevalence of hypertension, based on the 2017 ACC/AHA, was  
36 40.77%, and the JNC-7, 27.57%. The overall prevalence of hypertension, and in terms of  
37 all patient characteristics, were higher using the 2017 ACC/AHA guidelines compared to  
38 the JNC-7 guidelines. The difference in the prevalence was highest in the oldest age group.  
39  
40  
41  
42  
43  
44  
45  
46  
47  
48  
49  
50  
51  
52  
53  
54  
55  
56  
57  
58  
59  
60

Based on the JNC-7 guideline, only 24.84% of the patients were recommended to receive antihypertensive medication, compared to 27.67%, according to the 2017 ACC/AHA guideline. With the exception of males, there was an increase in the suggested use of antihypertensive medication for all patient characteristics using the 2017 ACC/AHA guideline. A small proportion, 13.10% of the hypertensive patients were recommended

1  
2  
3 lifestyle modification, based on the 2017 ACC/AHA guideline. Finally, an additional  
4  
5 2.83% of the hypertensive patients were recommended for an antihypertensive  
6  
7 intervention, based on the 2017 ACC/AHA guideline.  
8  
9

10 Hypertensive patients, based on the 2017 ACC/AHA guideline and not the JNC-7  
11  
12 guideline, compared with patients complying with the definition of hypertension based on  
13  
14 the JNC-7 guideline, were younger, have a lower BMI, better waist circumference profile,  
15  
16 lower SBP, and DBP (Table 3). When compared to individuals recommended to receive  
17  
18 treatment using the JNC-7 guideline, individuals recommended for  
19  
20 antihypertensive medication according to the 2017 ACC/AHA guideline, but not JNC-7  
21  
22 guideline, were younger, less likely to be diabetic, had lower SBP and DBP, but more likely  
23  
24 to have a CVD history.  
25  
26

### 27 **BP levels above the targeted goals by the 2017 ACC/AHA and JNC-7 Guidelines.**

28  
29  
30 The proportions of patients prescribed antihypertensive medication and presenting with  
31  
32 above-target BP, according to the 2017 ACC/AHA and JNC-7 guidelines, were 49.57%  
33  
34 and 27.80%, respectively (Table 4). Overall, the patients with an above-target BP,  
35  
36 according to the 2017 ACC/AHA guideline, but not the JNC-7 guideline, were younger,  
37  
38 less likely to be diabetic, with a lower SBP and DBP, and 52.31% were taking one class of  
39  
40 antihypertensive medication.  
41  
42  
43

### 44 **Determinants of hypertension and elevated blood pressure**

45  
46 The determinants of hypertension, according to the ACC/AHA and JNC-7 guidelines, are  
47  
48 presented in Supplementary Table 1 in the supplementary material (adjusted for all  
49  
50 variables shown in the tables). According to the ACC/AHA guideline, the determinants of  
51  
52 hypertension were increasing age, male gender, being a student or unemployed, having  
53  
54  
55  
56  
57  
58  
59  
60



1  
2  
3 diabetes, and increasing BMI, particularly with abdominal adiposity. The determinants of  
4 hypertension based on the JNC-7 guideline, were increasing age, male gender, employment  
5 status, time spent standing while at work, diabetes, and increasing BMI, mostly central  
6 obesity. The predictors of elevated blood pressure, adjusted for all covariates in the table, are  
7 presented in Supplementary Table 2. Elevated BP determinants were being male, younger  
8 age, sitting at work a few times, sometimes or most of the time, and an increased BMI.  
9

## 16 **DISCUSSION**

17  
18  
19 The current study assessed the impact of the 2017 ACC/AHA guideline definition of  
20 hypertension, the recommendation for the initiation of lifestyle modifications and  
21 antihypertensive medication, and the BP target of antihypertensive medication use in Saudi  
22 adults. Based on the 2017 ACC/AHA guideline, there was a substantial increase in the  
23 prevalence of hypertension (26.28%), but only a small increase (2.83%) in the proportion  
24 of adults who were recommended for antihypertensive medication. The increase in the  
25 prevalence of hypertension translates in an increase of 1.8 million hypertensive adults in  
26 the 5.1 million adults which, according to the latest census, are  $\geq 18$  years old<sup>19</sup>. The  
27 increase is predominantly observed in males (47.72%) compared to females (33.57%),  
28 individuals  $\geq 60$  years old (70.13%), diabetic patients (62.37%), and individuals who are  
29 obese (56.12%).  
30  
31  
32  
33  
34  
35  
36  
37  
38  
39  
40  
41  
42  
43

44 Our findings of the prevalence of hypertension complement research from Bangladesh<sup>16,27</sup>,  
45 Nepal<sup>14</sup>, and to a lesser extent, the U.S.<sup>13,17</sup>, which assessed the impact of the 2017  
46 ACC/AHA guidelines on the prevalence of hypertension. In the U.S. study, Muntner et  
47 al.<sup>13</sup> used the National Health and Nutrition Examination Survey and found a 13.7%  
48 increase in the prevalence of hypertension. However, the increase in Nepal (23%) and  
49  
50  
51  
52  
53  
54  
55  
56  
57  
58  
59  
60

1  
2  
3 Bangladesh (22%) were comparable to our results (26.28%). The difference may reflect  
4 the younger population of Nepal, Bangladesh, and Saudi Arabia compared to the U.S.  
5 population<sup>19 28 29</sup>.

6  
7  
8  
9  
10 According to the 2017 ACC/AHA guideline, 13.10% of the Saudi hypertensive patients  
11 will require lifestyle modifications without an antihypertensive medication intervention, a  
12 finding similar to the U.S. study by Muntner et al.<sup>13</sup>. Examples of the recommended  
13 lifestyle modifications include practicing a healthy lifestyle, such as eating a healthy diet,  
14 maintaining a healthy weight, avoiding smoking, and being physically active. These non-  
15 pharmacological interventions have been endorsed by the 2017 ACC/AHA guideline based  
16 on several observational and randomized controlled trials<sup>30</sup>. For instance, in normotensive  
17 individuals, engaging in physical activities of 90-150 minutes/week is associated with a  
18 reduction of 2-4 mmHg in systolic BP<sup>31</sup>. Although it is unfortunate that most of our  
19 population (70.70%), especially women (84.25%), reported never engaging in any  
20 moderate exercise, governmental efforts through the Quality of Life program are ongoing  
21 to promote physical activities. Future studies should assess the impact of these programs  
22 on the incidence of hypertension.

23  
24  
25  
26  
27  
28  
29  
30  
31  
32  
33  
34  
35  
36  
37  
38  
39  
40  
41 In the current study, 46.56% of the patients taking antihypertensive medication presented  
42 with a BP above the target suggested by the 2017 ACC/AHA guideline. Our result is  
43 congruent with studies from the U.S. and Bangladesh, where the proportions of patients  
44 with a BP above the target were 53.4% and 61%, respectively<sup>13 16</sup>. It is also similar to a  
45 study from Saudi Arabia, reporting that 55% of the sample had a BP above the target<sup>21</sup>. It  
46 is unclear whether the uncontrolled hypertension is due to patient factors, such as lack of  
47 medication adherence or the providers' inability to titrate antihypertensive treatment when  
48  
49  
50  
51  
52  
53  
54  
55  
56  
57  
58  
59  
60

1  
2  
3 the BP is suboptimal. It is also possible that the providers' lack of information or  
4 acceptance of the current BP guidelines contributed to the failure to recognize the current  
5 BP targets. A multidisciplinary disease management strategy and follow-up of patients  
6 with uncontrolled BP should be emphasized. To achieve the target BP in patients with an  
7 uncontrolled BP, intensive antihypertensive treatment is required.  
8  
9  
10  
11  
12  
13

## 14 15 **STRENGTHS AND LIMITATION**

16  
17 Our study has several strengths. Firstly, we used a large sample of the Saudi population  
18 (n=10799) from diverse backgrounds (e.g., wives, professionals, students, and unemployed  
19 women). Secondly, we ascertained the hypertensive status using BP measurements  
20 according to a standardized procedure. Our study also has several limitations. Firstly, the  
21 study is limited to the capital of Saudi Arabia, Riyadh. However, given the characteristics  
22 of the participants, we believe that the geographic location is unlikely to affect the external  
23 validity of our findings. Secondly, although the BP was measured using three readings, the  
24 measurement was performed during a single visit. Thirdly, we relied on the medical and  
25 pharmacy files to identify users of antihypertensive medication, and we may have missed  
26 some patients who were not identified with this approach. Fourthly, we do not have  
27 ambulatory BP data for the participants, which may overestimate some individuals who  
28 may have white coat hypertension. However, the prevalence of white coat hypertension is  
29 approximately 3% in a Saudi cohort, which is too small to affect the prevalence data.  
30  
31  
32  
33  
34  
35  
36  
37  
38  
39  
40  
41  
42  
43  
44  
45  
46

## 47 48 **CONCLUSION**

49  
50 The 2017 ACC/AHA guideline resulted in a concerning increase in the prevalence of  
51 hypertension and elevated blood pressure, with implications for escalating healthcare costs.  
52  
53 There was, however, only a small increase in the proportion of patients recommended to  
54  
55  
56  
57  
58  
59  
60

1  
2  
3 receive antihypertensive medication. Almost half (49.56%) of the patients prescribed  
4 antihypertensive medication, had a BP above the target set by the 2017 ACC/AHA  
5 guideline. Unless strong public health measures are adopted, including implementing  
6 lifestyle changes at a population level, with aggressive management of hypertension, we  
7 are likely to experience an upward trend in the prevalence of hypertension and associated  
8 cardiovascular morbidity and mortality.  
9

### 17 **ACKNOWLEDGEMENTS**

20 The authors would like to thank Dr. Mostafa Abolfotouh, Dr. Mohamed Hussein, Dr.  
21 Barrak Alsomaie, and Mr. Abdullah Alturki for their dedication and efforts in  
22 establishing and supporting the Saudi Biobank. We would also like to thank all members  
23 of the Saudi Biobank team.  
24

### 30 **FUNDING STATEMENT:**

33 None.

### 36 **DATA ACCESS STATEMENT**

39 Data not available due containing sensitive information that might expose the subject's  
40 identity.  
41

### 44 **CONTRIBUTION STATEMENT**

46 MA designed the study, conducted the analyses, and wrote the manuscript. RG collected  
47 data, conducted analyses, and drafted the manuscript. Jahad A., Ada A., Ahmed A., and  
48 AM assisted with the study design and assisted with manuscript preparation. All authors  
49 revised the manuscript and ensured its intellectual content. Jahad A. assisted with data  
50  
51  
52  
53  
54

1  
2  
3  
4  
5  
6  
7  
8  
9  
10  
11  
12  
13  
14  
15  
16  
17  
18  
19  
20  
21  
22  
23  
24  
25  
26  
27  
28  
29  
30  
31  
32  
33  
34  
35  
36  
37  
38  
39  
40  
41  
42  
43  
44  
45  
46  
47  
48  
49  
50  
51  
52  
53  
54  
55  
56  
57  
58  
59  
60

acquisition. All the authors have read and approved the final manuscript. All authors agreed to be accountable for all aspects of the work.

**CONFLICT OF INTEREST**

The authors declare that they have no competing interests.

For peer review only

**REFERENCE:**

1. Zhou D, Xi B, Zhao M, et al. Uncontrolled hypertension increases risk of all-cause and cardiovascular disease mortality in US adults: the NHANES III Linked Mortality Study. *Scientific reports* 2018;8(1):1-7.
2. Chan M. A global brief on Hypertension. *World Health Organization Switzerland* 2013
3. Sudharsanan N, Geldsetzer P. Impact of Coming Demographic Changes on the Number of Adults in Need of Care for Hypertension in Brazil, China, India, Indonesia, Mexico, and South Africa: A Modeling Study. *Hypertension* 2019;73(4):770-76.
4. Lackland DT, Weber MA. Global burden of cardiovascular disease and stroke: hypertension at the core. *Canadian Journal of Cardiology* 2015;31(5):569-71.
5. Han M, Li Q, Liu L, et al. Prehypertension and risk of cardiovascular diseases: a meta-analysis of 47 cohort studies. *Journal of Hypertension* 2019;37(12):2325-32.
6. Bolli P, Hemmelgarn B, Myers MG, et al. High normal blood pressure and prehypertension: The debate continues. *Canadian Journal of Cardiology* 2007;23(7):581-83.
7. Banach M, Michalska M, Kjeldsen SE, et al. What should be the optimal levels of blood pressure: does the J-curve phenomenon really exist? *Expert opinion on pharmacotherapy* 2011;12(12):1835-44.
8. Fan F, Yuan Z, Qin X, et al. Optimal systolic blood pressure levels for primary prevention of stroke in general hypertensive adults: findings from the CSPPT (China Stroke Primary Prevention Trial). *Hypertension* 2017;69(4):697-704.
9. Deedwania P. The ongoing saga of optimal blood pressure level in patients with diabetes mellitus and coronary artery disease: Am Heart Assoc, 2018.
10. Whelton PK, Carey RM, Aronow WS, et al. 2017 ACC/AHA/AAPA/ABC/ACPM/AGS/APhA/ASH/ASPC/NMA/PCNA guideline for the prevention, detection, evaluation, and management of high blood pressure in adults: a report of the American College of Cardiology/American Heart Association Task Force on Clinical Practice Guidelines. *Journal of the American College of Cardiology* 2018;71(19):e127-e248.
11. Chobanian AV. National High blood pressure education program committee: seventh report of the Joint National Committee on Prevention, Detection, Evaluation, and Treatment of High Blood Pressure. *Hypertension* 2003;42:1206-52.
12. Reboussin DM, Allen NB, Griswold ME, et al. Systematic review for the 2017 ACC/AHA/AAPA/ABC/ACPM/AGS/APhA/ASH/ASPC/NMA/PCNA guideline for the prevention, detection, evaluation, and management of high blood pressure in adults: a report of the American College of Cardiology/American Heart Association Task Force on Clinical Practice Guidelines. *Journal of the American College of Cardiology* 2018;71(19):2176-98.
13. Muntner P, Carey RM, Gidding S, et al. Potential US population impact of the 2017 ACC/AHA high blood pressure guideline. *Journal of the American College of Cardiology* 2018;71(2):109-18.
14. Al Kibria GM, Swasey K, Angela K, et al. Estimated change in prevalence of hypertension in Nepal following application of the 2017 ACC/AHA guideline. *JAMA Network Open* 2018;1(3):e180606-e06.
15. Khera R, Lu Y, Saxena A, et al. The impact of 2017 ACC/AHA guidelines on the prevalence of hypertension and eligibility for anti-hypertensive therapy in the United States and China. *bioRxiv* 2017:218859.

16. Islam JY, Zaman MM, Haq SA, et al. Epidemiology of hypertension among Bangladeshi adults using the 2017 ACC/AHA hypertension clinical practice guidelines and joint National Committee 7 guidelines. *Journal of human hypertension* 2018;32(10):668-80.
17. Wang D, Hatahet M, Wang Y, et al. Multivariate analysis of hypertension in general US adults based on the 2017 ACC/AHA guideline: data from the national health and nutrition examination survey 1999 to 2016. *Blood pressure* 2019;28(3):191-98.
18. Al Kibria GM, Swasey K, Choudhury A, et al. The new 2017 ACC/AHA guideline for classification of hypertension: changes in prevalence of hypertension among adults in Bangladesh. *Journal of human hypertension* 2018;32(8):608-16.
19. General Authority for Statistics. Demographic Survey 2016 [cited 2020. Available from: [https://www.stats.gov.sa/sites/default/files/en-demographic-research-2016\\_2.pdf](https://www.stats.gov.sa/sites/default/files/en-demographic-research-2016_2.pdf)2020.
20. El Bcheraoui C, Basulaiman M, Wilson S, et al. Breast cancer screening in Saudi Arabia: free but almost no takers. *Plos one* 2015;10(3):e0119051.
21. El Bcheraoui C, Memish ZA, Tuffaha M, et al. Hypertension and its associated risk factors in the Kingdom of Saudi Arabia, 2013: a national survey. *International journal of hypertension* 2014;2014
22. Yusufali AM, Khatib R, Islam S, et al. Prevalence, awareness, treatment and control of hypertension in four Middle East countries. *Journal of hypertension* 2017;35(7):1457-64.
23. Lear S, James P, Ko G, et al. Appropriateness of waist circumference and waist-to-hip ratio cutoffs for different ethnic groups. *European journal of clinical nutrition* 2010;64(1):42-61.
24. Bullano MF, Kamat S, Willey VJ, et al. Agreement between administrative claims and the medical record in identifying patients with a diagnosis of hypertension. *Medical care* 2006:486-90.
25. Smith C, Kosten S. Multiple Imputation: A Statistical Programming Story 2017 [Available from: <https://www.pharmasug.org/proceedings/2017/SP/PharmaSUG-2017-SP01.pdf>.
26. Von Elm E, Altman DG, Egger M, et al. The Strengthening the Reporting of Observational Studies in Epidemiology (STROBE) statement: guidelines for reporting observational studies. *Annals of internal medicine* 2007;147(8):573-77.
27. Khanam R, Ahmed S, Rahman S, et al. Prevalence and factors associated with hypertension among adults in rural Sylhet district of Bangladesh: a cross-sectional study. *BMJ open* 2019;9(10)
28. Samir K. An age distribution story: Reading into the population pyramid of Nepal. *Asian Population Studies* 2014;10(2):121-24.
29. Kabir R, Khan HT, Kabir M, et al. Population ageing in Bangladesh and its implication on health care. *European Scientific Journal* 2013;9(33):34-47.
30. Arnett DK, Blumenthal RS, Albert MA, et al. 2019 ACC/AHA guideline on the primary prevention of cardiovascular disease: a report of the American College of Cardiology/American Heart Association Task Force on Clinical Practice Guidelines. *Journal of the American College of Cardiology* 2019;74(10):e177-e232.
31. Stefani L, Mascherini G, Tosi B, et al. Hypertension today: Role of sports and exercise medicine. *Journal of Hypertension and Cardiology* 2019;2(4):20.

**Table 1. Characteristics of Saudi Biobank by BP levels and antihypertensive use, 2017-2020**

|                                  | SBP/DBP categories among those not taking antihypertensive medications (mmHg) |                      |                        |                  | Antihypertensive recorded (n=579) |
|----------------------------------|-------------------------------------------------------------------------------|----------------------|------------------------|------------------|-----------------------------------|
|                                  | <120/80 (n=4451)                                                              | 120-129/<80 (n=1648) | 130-139/80-89 (n=2683) | ≥140/90 (n=1438) |                                   |
| <b>Age, years</b><br>Mean (SD)   | 28.50 (7.44)                                                                  | 28.72 (8.25)         | 30.58 (9.06)           | 33.27 (10.73)    | 35.38 (9.92)                      |
| <b>Age, years</b><br>N (%)       |                                                                               |                      |                        |                  |                                   |
| 18-29                            | 2806 (63.04)                                                                  | 1053 (63.90)         | 1432 (53.37)           | 631 (43.88)      | 188 (32.47)                       |
| 30-39                            | 1257 (28.24)                                                                  | 417 (25.30)          | 851 (31.72)            | 418 (29.07)      | 197 (34.02)                       |
| 40-49                            | 318 (7.14)                                                                    | 136 (8.25)           | 288 (10.73)            | 263 (18.29)      | 141 (24.35)                       |
| 50-59                            | 61 (1.37)                                                                     | 36 (2.18)            | 86 (3.21)              | 101 (7.02)       | 42 (7.25)                         |
| ≥60                              | 9 (0.20)                                                                      | 6 (0.36)             | 26 (0.97)              | 25 (1.74)        | 11 (1.90)                         |
| <b>Gender,</b><br>N (%)          |                                                                               |                      |                        |                  |                                   |
| Female                           | 2587 (58.12)                                                                  | 706 (42.84)          | 1127 (42.01)           | 485 (33.73)      | 397 (68.57)                       |
| Male                             | 1864 (41.88)                                                                  | 942 (57.16)          | 1556 (57.99)           | 953 (66.27)      | 182 (31.43)                       |
| <b>Tobacco use,</b><br>N (%)     |                                                                               |                      |                        |                  |                                   |
| No                               | 3604 (83.19)                                                                  | 1331 (81.96)         | 2192 (83.35)           | 1158 (82.07)     | 526 (92.28)                       |
| Yes                              | 728 (16.81)                                                                   | 293 (18.04)          | 438 (16.65)            | 253 (17.93)      | 44 (7.72)                         |
| <b>Diabetes history, N (%)</b>   |                                                                               |                      |                        |                  |                                   |
| No                               | 2777 (62.39)                                                                  | 1010 (61.28)         | 1622 (60.45)           | 861 (59.87)      | 349 (60.28)                       |
| Yes                              | 1674 (37.61)                                                                  | 638 (38.71)          | 1061 (39.55)           | 577 (40.13)      | 230 (39.72)                       |
| <b>CVD history,</b><br>N (%)     |                                                                               |                      |                        |                  |                                   |
| No                               | 3657 (82.16)                                                                  | 1347 (81.74)         | 2145 (79.95)           | 1120 (77.89)     | 439 (75.82)                       |
| Yes                              | 794 (17.84)                                                                   | 301 (18.26)          | 538 (20.05)            | 318 (22.11)      | 140 (24.18)                       |
| <b>Blood pressure, Mean (SD)</b> |                                                                               |                      |                        |                  |                                   |
| Systolic blood pressure          | 108.47 (7.70)                                                                 | 124.01 (2.81)        | 126.55 (9.0)           | 143.81 (20.88)   | 123.40 (18.01)                    |
| Diastolic blood pressure         | 67.98 (6.68)                                                                  | 71.47 (5.71)         | 80.92 (5.88)           | 90.49 (13.17)    | 78.95 (15.45)                     |



**Table 2. The percentage of hypertension and the recommended antihypertensive medications in the Saudi Biobank according to the 2017 ACC/AHA Guideline and the JNC 7 Guideline**

| Characteristics              | 2017 ACC/AHA Guideline |                                          | JNC7 Guideline      |                                          | 2017 ACC/AHA but not JNC-7 |                                          |
|------------------------------|------------------------|------------------------------------------|---------------------|------------------------------------------|----------------------------|------------------------------------------|
|                              | HTN                    | Recommended Antihypertensive Medications | HTN                 | Recommended Antihypertensive Medications | HTN                        | Recommended Antihypertensive Medications |
|                              | % (95% CI)             | % (95% CI)                               | % (95% CI)          | % (95% CI)                               | % (95% CI)                 | % (95% CI)                               |
| Overall                      | 40.77 (40.60,40.94)    | 27.67 (27.52,27.82)                      | 14.49 (14.37,14.61) | 24.84 (24.69,24.98)                      | 26.28 (26.23,26.33)        | 2.83 (2.83,2.84)                         |
| <b>Age, years</b>            |                        |                                          |                     |                                          |                            |                                          |
| 18-29                        | 34.86 (34.64,35.08)    | 21.62 (21.43,21.81)                      | 10.67 (10.53,10.81) | 19.66 (19.47,19.84)                      | 24.19 (24.11,24.27)        | 1.96 (1.96,1.97)                         |
| 30-39                        | 43.44 (43.12,43.76)    | 29.68 (29.39,29.97)                      | 14.62 (14.40,14.85) | 26.46 (26.18,26.75)                      | 28.82 (28.72,28.91)        | 3.22 (3.21,3.22)                         |
| 40-49                        | 55.58 (55.06,56.11)    | 44.15 (43.63,44.68)                      | 27.33 (26.87,27.80) | 39.35 (38.84,39.87)                      | 28.25 (28.19,28.31)        | 4.80 (4.79,4.81)                         |
| 50-59                        | 66.87 (65.94,67.80)    | 54.91 (53.92,55.89)                      | 36.31 (35.39,37.22) | 48.16 (47.17,49.15)                      | 30.56 (30.55,30.58)        | 6.75 (6.75,6.74)                         |
| ≥60                          | 70.13 (68.23,71.96)    | 64.94 (62.97,66.85)                      | 34.15 (32.27,36.02) | 54.55 (52.51,56.57)                      | 35.98 (35.96,35.94)        | 10.39 (10.46,10.28)                      |
| <b>Gender</b>                |                        |                                          |                     |                                          |                            |                                          |
| Women                        | 33.57 (33.34,33.80)    | 32.02 (31.79,32.24)                      | 10.39 (10.24,10.54) | 19.97 (19.78,20.17)                      | 23.18 (23.10,23.26)        | 12.05 (12.01,12.07)                      |
| Men                          | 47.72 (47.48,47.96)    | 23.16 (22.95,23.37)                      | 18.45 (18.26,18.63) | 29.53 (29.31,29.75)                      | 29.27 (29.22,29.33)        | -6.37 (-6.36,-6.38)                      |
| <b>Marital status</b>        |                        |                                          |                     |                                          |                            |                                          |
| Never married                | 36.18 (35.95,36.40)    | 22.89 (22.70,23.09)                      | 11.91 (11.76,12.06) | 21.05 (20.86,21.24)                      | 24.27 (24.19,24.34)        | 1.84 (1.84,1.85)                         |
| Married                      | 46.39 (46.13,46.65)    | 33.37 (33.12,33.62)                      | 17.76 (17.59,17.99) | 29.39 (29.15,29.63)                      | 28.63 (28.54,28.66)        | 3.98 (3.97,3.99)                         |
| Divorced, Sep.               | 44.18 (44.10,46.25)    | 34.61 (33.58,35.65)                      | 17.30 (16.50,18.10) | 29.83 (28.84,30.82)                      | 26.88 (27.6,28.15)         | 4.78 (4.74,4.83)                         |
| <b>Tobacco use</b>           |                        |                                          |                     |                                          |                            |                                          |
| No                           | 40.93 (40.75,41.12)    | 27.81 (27.64,27.97)                      | 14.47 (14.34,14.60) | 24.94 (24.78,25.10)                      | 26.46 (26.41,26.52)        | 2.87 (2.86,2.87)                         |
| Yes                          | 39.98 (39.57,40.39)    | 27.00 (26.63,27.37)                      | 14.60 (14.30,14.89) | 24.32 (23.96,24.68)                      | 25.38 (25.27,25.50)        | 2.68 (2.67,2.69)                         |
| <b>Diabetes</b>              |                        |                                          |                     |                                          |                            |                                          |
| No                           | 39.37 (39.20,39.54)    | 18.87 (18.70,19.04)                      | 13.44 (13.32,13.56) | 14.25 (14.09,14.40)                      | 25.39 (25.88,25.98)        | 4.62 (4.61,4.64)                         |
| Yes                          | 62.37 (61.69,63.04)    | 41.60 (41.33,41.88)                      | 30.65 (30.01,31.30) | 41.60 (41.33,41.88)                      | 31.72 (31.68,31.74)        | 0                                        |
| <b>BMI, kg/m<sup>2</sup></b> |                        |                                          |                     |                                          |                            |                                          |
| Underweight                  | 20.84 (20.28,21.39)    | 11.72 (11.28,12.17)                      | 5.41 (5.10,5.72)    | 10.55 (10.13,10.97)                      | 15.43 (15.18,15.67)        | 1.17 (1.15,1.20)                         |
| Normal weight                | 30.76 (30.51,31.02)    | 19.14 (18.92,19.36)                      | 8.89 (8.73,9.04)    | 16.98 (16.77,17.19)                      | 21.87 (21.78,21.98)        | 2.16 (2.15,2.17)                         |
| Overweight                   | 44.37 (44.06,44.68)    | 30.40 (30.12,30.69)                      | 14.69 (14.47,14.92) | 27.16 (26.88,27.44)                      | 29.68 (29.59,29.76)        | 3.24 (3.24,3.25)                         |
| Obese                        | 56.12 (55.76,56.48)    | 40.46 (40.10,40.82)                      | 23.98 (23.67,24.29) | 36.63 (36.27,36.98)                      | 32.14 (32.09,32.19)        | 3.83 (3.83,3.84)                         |
| Extremely Obese              | 67.53 (66.53,68.54)    | 54.21 (53.14,55.28)                      | 37.82 (36.78,38.87) | 50.46 (49.38,51.53)                      | 29.71 (29.75,29.67)        | 3.75 (3.76,3.75)                         |
| <b>Waist Circum., cm</b>     |                        |                                          |                     |                                          |                            |                                          |
| Normal                       | 32.65 (32.44,32.85)    | 20.51 (20.34,20.68)                      | 9.30 (9.17,9.42)    | 18.13 (17.96,18.29)                      | 23.35 (23.27,23.43)        | 2.38 (2.38,2.39)                         |
| Not Normal                   | 55.54 (55.25,55.83)    | 40.68 (40.39,40.96)                      | 23.94 (23.69,24.18) | 37.03 (36.75,37.30)                      | 31.60 (31.56,31.65)        | 3.65 (3.64,3.66)                         |
| <b>Waist-hip ratio</b>       |                        |                                          |                     |                                          |                            |                                          |
| Normal                       | 37.55 (37.37,37.74)    | 24.68 (24.51,24.84)                      | 12.38 (12.26,12.51) | 22.11 (21.95,22.27)                      | 25.17 (25.11,25.23)        | 2.57 (2.56,2.57)                         |
| Not Normal                   | 54.57 (54.18,54.97)    | 40.50 (40.11,40.88)                      | 23.53 (23.19,23.86) | 36.51 (36.13,36.89)                      | 31.04 (30.99,31.11)        | 3.99 (3.98,3.99)                         |

SD: Standard Deviation, SAR: Saudi Arabian Riyals

**Table 3: Characteristics of the Saudi Biobank population not taking antihypertensive medications meeting the definition of HTN and recommended antihypertensive according to 2017 ACC/AHA Guideline and JNC-7 Guideline, 2017-2020.**

|                                                    | HTN according to  |                   |                                  | Recommended treatment by |                   |                                  |
|----------------------------------------------------|-------------------|-------------------|----------------------------------|--------------------------|-------------------|----------------------------------|
|                                                    | ACC<br>(n=4121)   | JNC 7<br>(n=1438) | ACC but not<br>JNC-7<br>(n=2683) | ACC (n=<br>2783)         | JNC 7<br>(n=743)  | ACC but<br>not JNC-7<br>(n=2040) |
| <b>Age, Mean (SD)</b>                              | 31.52 (9.76)      | 33.27<br>(10.73)  | 30.58 (9.06)                     | 32.53<br>(10.23)         | 34.06<br>(10.61)  | 31.97<br>(10.04)                 |
| <b>Male gender, %</b>                              | 60.88             | 66.27             | 57.99                            | 60.15                    | 65.28             | 58.28                            |
| <b>Tobacco use, %</b>                              | 17.10             | 17.93             | 16.65                            | 17.06                    | 17.93             | 16.73                            |
| <b>Diabetes, %</b>                                 | 39.75             | 40.13             | 39.55                            | 58.86                    | 77.66             | 52.01                            |
| <b>CVD, (%)</b>                                    | 20.77             | 22.11             | 20.05                            | 30.76                    | 25.30             | 32.75                            |
| <b>BMI, kg/m<sup>2</sup></b>                       |                   |                   |                                  |                          |                   |                                  |
| Underweight                                        | 3.09              | 2.29              | 3.51                             | 2.66                     | 1.75              | 2.99                             |
| Normal weight                                      | 29.50             | 23.64             | 32.65                            | 26.94                    | 22.07             | 28.72                            |
| Overweight                                         | 32.64             | 30.39             | 33.84                            | 33.02                    | 30.55             | 33.92                            |
| Obese                                              | 30.30             | 36.72             | 26.86                            | 32.16                    | 38.63             | 29.80                            |
| Extremely Obese                                    | 4.47              | 6.95              | 3.14                             | 5.22                     | 7.0               | 4.57                             |
| <b>Waist Circum.<br/>(cm)</b>                      |                   |                   |                                  |                          |                   |                                  |
| Not Normal,%                                       | 47.25             | 57.37             | 41.82                            | 50.99                    | 58.55             | 48.24                            |
| <b>WtHR</b>                                        |                   |                   |                                  |                          |                   |                                  |
| Not Normal,%                                       | 23.88             | 28.93             | 21.17                            | 26.05                    | 29.21             | 24.90                            |
| <b>Systolic blood<br/>pressure, Mean<br/>(SD)</b>  | 132.57<br>(16.51) | 143.81<br>(20.88) | 126.55 (9.00)                    | 135.59<br>(18.30)        | 147.43<br>(26.75) | 131.28<br>(11.26)                |
| <b>Diastolic blood<br/>pressure, Mean<br/>(SD)</b> | 84.26<br>(10.19)  | 90.49<br>(13.17)  | 80.92 (5.88)                     | 86.00<br>(11.28)         | 93.48<br>(16.06)  | 83.27<br>(7.20)                  |

**Table 4: Characteristics of the Saudi Biobank population taking antihypertensive medications with BP above treatment goals according to 2017 ACC/AHA Guideline and JNC-7 Guideline, 2017-2020.**

|                                               | BP above goal according to |                |                           |
|-----------------------------------------------|----------------------------|----------------|---------------------------|
|                                               | ACC (n=287)                | JNC 7 (n=161)  | ACC but not JNC-7 (n=126) |
| <b>Age, Mean (SD)</b>                         | 37.26 (9.94)               | 39.71 (9.72)   | 34.13 (9.35)              |
| <b>Male gender, %</b>                         | 40.07                      | 45.34          | 33.33                     |
| <b>Tobacco use, %</b>                         | 7.80                       | 6.96           | 8.87                      |
| <b>Diabetes, %</b>                            | 35.89                      | 46.58          | 22.22                     |
| <b>CVD, (%)</b>                               | 25.09                      | 24.84          | 25.40                     |
| <b>BMI, kg/m<sup>2</sup></b>                  |                            |                |                           |
| Underweight                                   | 4.18                       | 2.48           | 6.35                      |
| Normal weight                                 | 28.92                      | 26.71          | 31.75                     |
| Overweight                                    | 32.06                      | 29.19          | 35.71                     |
| Obese                                         | 30.66                      | 34.78          | 25.40                     |
| Extremely Obese                               | 4.18                       | 6.83           | 0.79                      |
| <b>Waist Circum. (cm)</b>                     |                            |                |                           |
| Not Normal, %                                 | 56.45                      | 63.98          | 46.83                     |
| <b>WtHR</b>                                   |                            |                |                           |
| Not Normal, %                                 | 42.16                      | 44.72          | 38.89                     |
| <b>Systolic blood pressure, Mean (SD)</b>     | 135.11 (17.21)             | 144.07 (15.99) | 123.65 (10.71)            |
| <b>Diastolic blood pressure, Mean (SD)</b>    | 88.65 (15.91)              | 93.42 (19.45)  | 82.56 (5.34)              |
| <b>Number of antihypertensive medications</b> |                            |                |                           |
| 1                                             | 45.51                      | 41.59          | 52.31                     |
| 2                                             | 29.78                      | 31.86          | 26.15                     |
| 3                                             | 7.87                       | 7.96           | 7.69                      |
| 4                                             | 8.99                       | 8.85           | 9.23                      |
| ≥5                                            | 7.87                       | 9.73           | 4.62                      |

**Supplementary table 1. Determinants of hypertension according to guidelines among Saudi Biobank, 2017-2020 (n = 10799)**

| Characteristics          | ACC/AHA          |                  |       | JNC-7            |                   |       |
|--------------------------|------------------|------------------|-------|------------------|-------------------|-------|
|                          | OR (95% CI)      | AOR (95% CI)     | P     | OR (95% CI)      | AOR (95% CI)      | P     |
| <b>Gender</b>            |                  |                  |       |                  |                   |       |
| Women                    | 1.0              | 1.0              |       | 1.0              | 1.0               |       |
| Men                      | 1.80 (1.67,1.95) | 2.79 (2.51,3.11) | <0.01 | 1.95 (1.74,2.18) | 3.10 (2.66,3.60)  | <0.01 |
| <b>Age (years)</b>       |                  |                  |       |                  |                   |       |
| 18-29                    | 1.0              | 1.0              |       | 1.0              | 1.0               |       |
| 30-39                    | 1.43 (1.31,1.57) | 1.27 (1.13,1.44) | <0.01 | 1.42 (1.25,1.62) | 1.39 (1.16,1.67)  | <0.01 |
| 40-49                    | 2.34 (2.06,2.66) | 1.70 (1.44,2.02) | <0.01 | 3.14 (2.69,3.66) | 2.55 (2.03,3.19)  | <0.01 |
| 50-59                    | 3.77 (2.98,3.78) | 2.28 (1.72,3.03) | <0.01 | 4.82 (3.79,6.13) | 3.23 (2.34,4.44)  | <0.01 |
| ≥60                      | 4.39 (2.68,7.17) | 2.09 (1.20,3.63) | 0.009 | 4.53 (2.81,7.28) | 2.21 (1.26,3.87)  | <0.01 |
| <b>Marital status</b>    |                  |                  |       |                  |                   |       |
| Never married            | 1.0              | 1.0              |       | 1.0              | 1.0               |       |
| Married                  | 1.53 (1.41,1.65) | 0.91 (0.81,1.02) | 0.12  | 1.60 (1.43,1.78) | 0.73 (0.61,0.87)  | <0.01 |
| Divorced, separated      | 1.45 (1.14,1.85) | 1.07 (0.81,1.41) | 0.67  | 1.64 (1.19,2.26) | 0.95 (0.66,1.38)  | 0.66  |
| <b>Education</b>         |                  |                  |       |                  |                   |       |
| < Primary school         | 1.0              | 1.0              |       | 1.0              | 1.0               |       |
| Primary school           | 1.04 (0.66,1.63) | 1.11 (0.69,1.79) | 0.65  | 1.08 (0.66,1.75) | 1.18 (0.70,1.98)  | 0.53  |
| Intermediate school      | 0.71 (0.47,1.08) | 0.82 (0.52,1.28) | 0.37  | 0.73 (0.46,1.16) | 0.84 (0.51,1.39)  | 0.47  |
| High school              | 0.43 (0.30,0.62) | 0.75 (0.49,1.12) | 0.15  | 0.39 (0.26,0.59) | 0.78 (0.49,1.23)  | 0.26  |
| Some college             | 0.65 (0.44,0.97) | 1.01 (0.65,1.56) | 0.98  | 0.58 (0.37,0.89) | 1.00 (0.61,1.65)  | 0.95  |
| Bachelor's degree        | 0.47 (0.32,0.68) | 0.86 (0.57,1.31) | 0.47  | 0.37 (0.25,0.56) | 0.78 (0.49,1.25)  | 0.27  |
| Higher education         | 0.47 (0.31,0.72) | 0.80 (0.49,1.29) | 0.34  | 0.44 (0.27,0.73) | 0.79 (0.45,1.41)  | 0.37  |
| <b>Employment status</b> |                  |                  |       |                  |                   |       |
| Employed                 | 1.0              | 1.0              |       | 1.0              | 1.0               |       |
| Unemployed               | 0.87 (0.75,1.00) | 1.27 (1.04,1.55) | 0.01  | 0.89 (0.72,1.08) | 1.35 (1.03,1.78)  | 0.02  |
| Student                  | 0.83 (0.76,0.91) | 1.36 (1.14,1.63) | <0.01 | 0.75 (0.65,0.86) | 1.60 (0.90, 1.50) | 0.21  |
| Retired/others           | 1.21 (1.07,1.37) | 1.21 (1.00,1.45) | 0.03  | 1.35 (1.15,1.58) | 1.24 (0.96,1.59)  | 0.07  |
| <b>Income</b>            |                  |                  |       |                  |                   |       |
| ≤5000                    | 1.0              | 1.0              |       | 1.0              | 1.0               |       |
| 5001 - 10,000            | 0.98 (0.89,1.08) | 0.86 (0.72,1.03) | 0.12  | 0.95 (0.83,1.09) | 0.76 (0.60,0.97)  | 0.04  |
| 1,0001 - 15,000          | 1.45 (1.27,1.65) | 1.03 (0.83,1.27) | 0.66  | 1.45 (1.22,1.72) | 0.94 (0.71,1.25)  | 0.80  |
| 15,001 – 20,000          | 1.63 (1.34,1.99) | 1.08 (0.82,1.43) | 0.45  | 1.68 (1.31,2.15) | 0.98 (0.69,1.39)  | 0.92  |
| >20,000                  | 1.59 (1.22,2.06) | 0.85 (0.61,1.20) | 0.45  | 1.90 (1.40,2.58) | 0.89 (0.58,1.37)  | 0.83  |
| <b>Vigorous exercise</b> |                  |                  |       |                  |                   |       |
| Never                    | 1.0              | 1.0              |       | 1.0              | 1.0               |       |
| 1                        | 0.85 (0.73,0.99) | 0.79 (0.67,0.94) | <0.01 | 0.84 (0.68,1.05) | 1.17 (0.93,1.48)  | 0.18  |

|    |                               |                   |                  |       |                   |                  |       |
|----|-------------------------------|-------------------|------------------|-------|-------------------|------------------|-------|
| 1  |                               |                   |                  |       |                   |                  |       |
| 2  |                               |                   |                  |       |                   |                  |       |
| 3  | 2-3                           | 0.73 (0.63,0.84)  | 0.75 (0.65,0.88) | <0.01 | 0.67 (0.54,0.83)  | 0.87 (0.64,1.18) | 0.36  |
| 4  | 4-5                           | 0.68 (0.58,0.79)  | 0.68 (0.57,0.81) | <0.01 | 0.59 (0.46,0.76)  | 0.75 (0.54,1.04) | 0.08  |
| 5  | >5                            | 0.69 (0.57,0.82)  | 0.72 (0.59,0.87) | <0.01 | 0.57 (0.43,0.76)  | 0.76 (0.53,1.10) | 0.14  |
| 6  | <b>Time standing at work</b>  |                   |                  |       |                   |                  |       |
| 7  |                               |                   |                  |       |                   |                  |       |
| 8  | Never                         | 1.0               | 1.0              |       | 1.0               | 1.0              |       |
| 9  | A few times                   | 1.09 (0.81,1.46)  | 1.09 (0.80,1.50) | 0.56  | 2.32 (1.34,4.02)  | 2.60 (1.47,4.62) | <0.01 |
| 10 | Sometimes                     | 1.16 (0.86,1.55)  | 1.18 (0.86,1.62) | 0.28  | 2.27 (1.31,3.94)  | 2.60 (1.47,4.62) | <0.01 |
| 11 | Most of the times             | 0.95 (0.70,1.28)  | 1.03 (0.74,1.42) | 0.84  | 2.10 (1.20,3.67)  | 2.66 (1.48,4.76) | <0.01 |
| 12 | All the times                 | 0.87 (0.55,1.37)  | 0.95 (0.58,1.55) | 0.86  | 1.56 (0.71,3.39)  | 1.92 (0.85,4.34) | 0.11  |
| 13 | <b>Tobacco use</b>            |                   |                  |       |                   |                  |       |
| 14 | No                            | 1.0               | 1.0              |       | 1.0               | 1.0              |       |
| 15 | Yes                           | 0.96 (0.87,1.07)  | 0.75 (0.66,0.85) | <0.01 | 1.01 (0.87,1.17)  | 0.79 (0.67,0.93) | <0.01 |
| 16 | <b>Diabetes</b>               |                   |                  |       |                   |                  |       |
| 17 | No                            | 1.0               | 1.0              |       | 1.0               | 1.0              |       |
| 18 | Yes                           | 2.55 (2.17,3.00)  | 1.67 (1.40,1.99) | <0.01 | 2.48 (2.39,3.39)  | 1.64 (1.34,2.00) | <0.01 |
| 19 | <b>BMI (kg/m<sup>2</sup>)</b> |                   |                  |       |                   |                  |       |
| 20 | Underweight                   | 1.0               | 1.0              |       | 1.0               | 1.0              |       |
| 21 | Normal weight                 | 1.69 (1.39,2.05)  | 1.67 (1.37,2.04) | <0.01 | 1.70 (1.20,2.41)  | 1.67 (1.17,2.38) | <0.01 |
| 22 | Overweight                    | 3.03 (2.49,3.69)  | 2.43 (1.97,3.00) | <0.01 | 3.01 (2.13,4.24)  | 2.15 (1.50,3.08) | <0.01 |
| 23 | Obese                         | 4.86 (3.97,5.94)  | 3.17 (2.52,3.99) | <0.01 | 5.51 (3.90,7.77)  | 2.97 (2.04,4.34) | <0.01 |
| 24 | Extremely Obese               | 7.90 (5.78,10.79) | 4.64 (3.31,6.52) | <0.01 | 10.62(7.04,16.01) | 5.24 (3.35,8.19) | <0.01 |
| 25 | <b>Waist Circum.</b>          |                   |                  |       |                   |                  |       |
| 26 | Normal                        | 1.0               | 1.0              |       | 1.0               | 1.0              |       |
| 27 | Not Normal                    | 2.58 (2.38,2.79)  | 1.32 (1.17,1.50) | <0.01 | 3.07 (2.75,3.43)  | 1.53 (1.29,1.81) | <0.01 |
| 28 | <b>Waist to hip ratio</b>     |                   |                  |       |                   |                  |       |
| 29 | Normal                        | 1.0               | 1.0              |       | 1.0               | 1.0              |       |
| 30 | Not Normal                    | 1.99 (1.81,2.20)  | 1.27 (1.13,1.43) | <0.01 | 2.18 (1.93,2.45)  | 1.19 (1.02,1.38) | 0.02  |

Waist Circumference: (men<94, women <80), Waist to hip ratio: (men<0.95, women <0.80), AOR: Adjusted OR.

**Supplementary table 2. The percentage and determinants of elevated BP according to 2017 ACC/AHA Guideline among Saudi Biobank, 2017-2020 (n = 10799)**

| Characteristics              | Elevated BP according to 2017 ACC/AHA Guideline |                  |                  |         |
|------------------------------|-------------------------------------------------|------------------|------------------|---------|
|                              | Percentage (95% CI)                             | OR (95% CI)      | AOR (95% CI)     | P-value |
| Overall                      | 15.82 (15.69,15.94)                             | -                | -                | -       |
| <b>Gender</b>                |                                                 |                  |                  |         |
| Women                        | 14.07 (13.90,14.24)                             | 1.0              | 1.0              |         |
| Men                          | 17.50 (17.32,17.68)                             | 1.29 (1.17,1.44) | 1.35 (1.19,1.54) | <0.01   |
| <b>Age, years</b>            |                                                 |                  |                  |         |
| 18-29                        | 17.64 (17.47,17.82)                             | 1.0              | 1.0              |         |
| 30-39                        | 13.95 (13.73,14.17)                             | 0.76 (0.67,0.85) | 0.76 (0.66,0.88) | <0.01   |
| 40-49                        | 12.83 (12.47,13.18)                             | 0.69 (0.57,0.83) | 0.71 (0.58,0.87) | <0.01   |
| 50-59                        | 11.35 (10.73,11.98)                             | 0.60 (0.42,0.85) | 0.62 (0.43,0.89) | <0.01   |
| ≥60                          | 10.39 (9.15,11.63)                              | 0.54 (0.26,1.13) | 0.54 (0.26,1.15) | 0.08    |
| <b>Employment</b>            |                                                 |                  |                  |         |
| Employed                     | 15.51 (15.34,15.69)                             | 1.0              | 1.0              |         |
| Unemployed                   | 16.10 (15.68,16.52)                             | 1.04 (0.87,1.26) | 1.15 (0.94,1.41) | 0.11    |
| Student                      | 17.62 (17.37,17.87)                             | 1.16 (1.03,1.31) | 1.11 (0.96,1.29) | 0.10    |
| Retired/others               | 12.81 (12.48,13.14)                             | 0.80 (0.67,0.96) | 1.01 (0.83,1.24) | 0.52    |
| <b>Time sitting at work</b>  |                                                 |                  |                  |         |
| Never                        | 8.02 (7.12,8.92)                                | 1.0              | 1.0              |         |
| A few times                  | 15.80 (15.53,16.07)                             | 2.15 (1.08,4.30) | 2.39 (1.19,4.77) | 0.02    |
| Sometimes                    | 16.41 (16.17,16.65)                             | 2.25 (1.13,4.48) | 2.59 (1.30,5.17) | 0.01    |
| Most of the times            | 15.66(15.47,15.84)                              | 2.13 (1.07,4.23) | 2.34 (1.17,4.66) | 0.03    |
| All the times                | 15.44 (14.70,16.17)                             | 2.10 (0.99,4.42) | 2.10 (0.99,4.44) | 0.08    |
| <b>Current smoker</b>        |                                                 |                  |                  |         |
| No                           | 15.62 (15.48,15.75)                             | 1.0              | 1.0              |         |
| Yes                          | 16.80 (16.49,17.12)                             | 1.09 (0.95,1.25) | 0.97 (0.83,1.12) | 0.72    |
| <b>Diabetes</b>              |                                                 |                  |                  |         |
| No                           | 15.76 (15.60,15.92)                             | 1.0              | 1.0              |         |
| Yes                          | 15.91 (15.71,16.11)                             | 0.99 (0.89,1.10) | 1.03 (0.93,1.15) | 0.61    |
| <b>BMI, kg/m<sup>2</sup></b> |                                                 |                  |                  |         |
| Underweight                  | 12.14 (11.69,12.59)                             | 1.0              | 1.0              |         |
| Normal weight                | 16.30 (16.10,16.50)                             | 1.41 (1.10,1.80) | 1.48 (1.16,1.89) | <0.01   |
| Overweight                   | 16.47 (16.23,16.70)                             | 1.43 (1.11,1.83) | 1.64 (1.27,2.12) | <0.01   |
| Obese                        | 15.30 (15.04,15.56)                             | 1.31 (1.01,1.69) | 1.68 (1.26,2.24) | <0.01   |
| Extremely Obese              | 14.41 (13.65,15.16)                             | 1.22 (0.81,1.83) | 1.54 (1.00,2.37) | 0.04    |
| <b>Waist Circum. (cm)</b>    |                                                 |                  |                  |         |
| Normal                       | 16.36 (16.20,16.52)                             | 1.0              | 1.0              |         |
| Not Normal                   | 14.83 (14.62,15.03)                             | 0.89 (0.80,0.99) | 0.91 (0.77,1.07) | 0.21    |
| <b>WtHR</b>                  |                                                 |                  |                  |         |
| Normal                       | 16.27 (16.12,16.41)                             | 1.0              | 1.0              |         |
| Not Normal                   | 13.89 (13.62,14.17)                             | 0.83 (0.72,0.95) | 0.99 (0.84,1.16) | 0.93    |

Waist Circumference: (men<94, women <80), WtHR (Waist to hip ratio): (men<0.95, women <0.80), AOR: Adjusted OR, SR: Saudi Riyals.

# Reporting checklist for cross sectional study.

Based on the STROBE cross sectional guidelines.

## Instructions to authors

Complete this checklist by entering the page numbers from your manuscript where readers will find each of the items listed below.

Your article may not currently address all the items on the checklist. Please modify your text to include the missing information. If you are certain that an item does not apply, please write "n/a" and provide a short explanation.

Upload your completed checklist as an extra file when you submit to a journal.

In your methods section, say that you used the STROBE cross sectional reporting guidelines, and cite them as:

von Elm E, Altman DG, Egger M, Pocock SJ, Gotsche PC, Vandembroucke JP. The Strengthening the Reporting of Observational Studies in Epidemiology (STROBE) Statement: guidelines for reporting observational studies.

|  | Reporting Item                                                                                         | Page Number |
|--|--------------------------------------------------------------------------------------------------------|-------------|
|  | <b>Title and abstract</b>                                                                              |             |
|  | <b>Title</b>                                                                                           |             |
|  | <a href="#">#1a</a> Indicate the study's design with a commonly used term in the title or the abstract | 1           |

|    |                     |                     |                                |           |
|----|---------------------|---------------------|--------------------------------|-----------|
| 1  | Abstract            | <a href="#">#1b</a> | Provide in the abstract an     | 2,3       |
| 2  |                     |                     | informative and balanced       |           |
| 3  |                     |                     | summary of what was done       |           |
| 4  |                     |                     | and what was found             |           |
| 5  |                     |                     |                                |           |
| 6  |                     |                     |                                |           |
| 7  |                     |                     |                                |           |
| 8  |                     |                     |                                |           |
| 9  |                     |                     |                                |           |
| 10 |                     |                     |                                |           |
| 11 | <b>Introduction</b> |                     |                                |           |
| 12 |                     |                     |                                |           |
| 13 |                     |                     |                                |           |
| 14 | Background /        | <a href="#">#2</a>  | Explain the scientific         | 3,4       |
| 15 | rationale           |                     | background and rationale for   |           |
| 16 |                     |                     | the investigation being        |           |
| 17 |                     |                     | reported                       |           |
| 18 |                     |                     |                                |           |
| 19 |                     |                     |                                |           |
| 20 |                     |                     |                                |           |
| 21 |                     |                     |                                |           |
| 22 |                     |                     |                                |           |
| 23 |                     |                     |                                |           |
| 24 | Objectives          | <a href="#">#3</a>  | State specific objectives,     | 4         |
| 25 |                     |                     | including any prespecified     |           |
| 26 |                     |                     | hypotheses                     |           |
| 27 |                     |                     |                                |           |
| 28 |                     |                     |                                |           |
| 29 |                     |                     |                                |           |
| 30 |                     |                     |                                |           |
| 31 |                     |                     |                                |           |
| 32 | <b>Methods</b>      |                     |                                |           |
| 33 |                     |                     |                                |           |
| 34 |                     |                     |                                |           |
| 35 | Study design        | <a href="#">#4</a>  | Present key elements of        | 5         |
| 36 |                     |                     | study design early in the      |           |
| 37 |                     |                     | paper                          |           |
| 38 |                     |                     |                                |           |
| 39 |                     |                     |                                |           |
| 40 |                     |                     |                                |           |
| 41 |                     |                     |                                |           |
| 42 | Setting             | <a href="#">#5</a>  | Describe the setting,          | 5,6,7,8,9 |
| 43 |                     |                     | locations, and relevant dates, |           |
| 44 |                     |                     | including periods of           |           |
| 45 |                     |                     | recruitment, exposure, follow- |           |
| 46 |                     |                     | up, and data collection        |           |
| 47 |                     |                     |                                |           |
| 48 |                     |                     |                                |           |
| 49 |                     |                     |                                |           |
| 50 |                     |                     |                                |           |
| 51 |                     |                     |                                |           |
| 52 |                     |                     |                                |           |
| 53 |                     |                     |                                |           |
| 54 |                     |                     |                                |           |
| 55 |                     |                     |                                |           |
| 56 |                     |                     |                                |           |
| 57 |                     |                     |                                |           |
| 58 |                     |                     |                                |           |
| 59 |                     |                     |                                |           |
| 60 |                     |                     |                                |           |



|    |                      |                     |                                    |           |
|----|----------------------|---------------------|------------------------------------|-----------|
| 1  | Eligibility criteria | <a href="#">#6a</a> | Give the eligibility criteria, and | 9         |
| 2  |                      |                     |                                    |           |
| 3  |                      |                     | the sources and methods of         |           |
| 4  |                      |                     | selection of participants.         |           |
| 5  |                      |                     |                                    |           |
| 6  |                      |                     |                                    |           |
| 7  |                      |                     |                                    |           |
| 8  |                      |                     |                                    |           |
| 9  |                      | <a href="#">#7</a>  | Clearly define all outcomes,       | 5,6,7,8   |
| 10 |                      |                     | exposures, predictors,             |           |
| 11 |                      |                     | potential confounders, and         |           |
| 12 |                      |                     | effect modifiers. Give             |           |
| 13 |                      |                     | diagnostic criteria, if            |           |
| 14 |                      |                     | applicable                         |           |
| 15 |                      |                     |                                    |           |
| 16 |                      |                     |                                    |           |
| 17 |                      |                     |                                    |           |
| 18 |                      |                     |                                    |           |
| 19 |                      |                     |                                    |           |
| 20 |                      |                     |                                    |           |
| 21 |                      |                     |                                    |           |
| 22 |                      |                     |                                    |           |
| 23 | Data sources /       | <a href="#">#8</a>  | For each variable of interest      | 5,6,7,8   |
| 24 | measurement          |                     | give sources of data and           |           |
| 25 |                      |                     | details of methods of              |           |
| 26 |                      |                     | assessment (measurement).          |           |
| 27 |                      |                     | Describe comparability of          |           |
| 28 |                      |                     | assessment methods if there        |           |
| 29 |                      |                     | is more than one group. Give       |           |
| 30 |                      |                     | information separately for for     |           |
| 31 |                      |                     | exposed and unexposed              |           |
| 32 |                      |                     | groups if applicable.              |           |
| 33 |                      |                     |                                    |           |
| 34 |                      |                     |                                    |           |
| 35 |                      |                     |                                    |           |
| 36 |                      |                     |                                    |           |
| 37 |                      |                     |                                    |           |
| 38 |                      |                     |                                    |           |
| 39 |                      |                     |                                    |           |
| 40 |                      |                     |                                    |           |
| 41 |                      |                     |                                    |           |
| 42 |                      |                     |                                    |           |
| 43 |                      |                     |                                    |           |
| 44 |                      |                     |                                    |           |
| 45 |                      |                     |                                    |           |
| 46 |                      |                     |                                    |           |
| 47 | Bias                 | <a href="#">#9</a>  | Describe any efforts to            | 5,6,7,8,9 |
| 48 |                      |                     | address potential sources of       |           |
| 49 |                      |                     | bias                               |           |
| 50 |                      |                     |                                    |           |
| 51 |                      |                     |                                    |           |
| 52 |                      |                     |                                    |           |
| 53 |                      |                     |                                    |           |
| 54 | Study size           | <a href="#">#10</a> | Explain how the study size         | 9         |
| 55 |                      |                     | was arrived at                     |           |
| 56 |                      |                     |                                    |           |
| 57 |                      |                     |                                    |           |
| 58 |                      |                     |                                    |           |
| 59 |                      |                     |                                    |           |
| 60 |                      |                     |                                    |           |

|    |                |                      |                               |     |
|----|----------------|----------------------|-------------------------------|-----|
| 1  | Quantitative   | <a href="#">#11</a>  | Explain how quantitative      | 8,9 |
| 2  |                |                      |                               |     |
| 3  | variables      |                      | variables were handled in the |     |
| 4  |                |                      |                               |     |
| 5  |                |                      | analyses. If applicable,      |     |
| 6  |                |                      |                               |     |
| 7  |                |                      | describe which groupings      |     |
| 8  |                |                      |                               |     |
| 9  |                |                      | were chosen, and why          |     |
| 10 |                |                      |                               |     |
| 11 |                |                      |                               |     |
| 12 |                |                      |                               |     |
| 13 | Statistical    | <a href="#">#12a</a> | Describe all statistical      | 8,9 |
| 14 |                |                      |                               |     |
| 15 | methods        |                      | methods, including those      |     |
| 16 |                |                      |                               |     |
| 17 |                |                      | used to control for           |     |
| 18 |                |                      |                               |     |
| 19 |                |                      | confounding                   |     |
| 20 |                |                      |                               |     |
| 21 |                |                      |                               |     |
| 22 |                |                      |                               |     |
| 23 | Statistical    | <a href="#">#12b</a> | Describe any methods used     | 8,9 |
| 24 |                |                      |                               |     |
| 25 | methods        |                      | to examine subgroups and      |     |
| 26 |                |                      |                               |     |
| 27 |                |                      | interactions                  |     |
| 28 |                |                      |                               |     |
| 29 |                |                      |                               |     |
| 30 |                |                      |                               |     |
| 31 | Statistical    | <a href="#">#12c</a> | Explain how missing data      | 9   |
| 32 |                |                      |                               |     |
| 33 | methods        |                      | were addressed                |     |
| 34 |                |                      |                               |     |
| 35 |                |                      |                               |     |
| 36 | Statistical    | <a href="#">#12d</a> | If applicable, describe       | n/a |
| 37 |                |                      |                               |     |
| 38 | methods        |                      | analytical methods taking     |     |
| 39 |                |                      |                               |     |
| 40 |                |                      | account of sampling strategy  |     |
| 41 |                |                      |                               |     |
| 42 |                |                      |                               |     |
| 43 |                |                      |                               |     |
| 44 | Statistical    | <a href="#">#12e</a> | Describe any sensitivity      | 9   |
| 45 |                |                      |                               |     |
| 46 | methods        |                      | analyses                      |     |
| 47 |                |                      |                               |     |
| 48 |                |                      |                               |     |
| 49 | <b>Results</b> |                      |                               |     |
| 50 |                |                      |                               |     |
| 51 |                |                      |                               |     |
| 52 | Participants   | <a href="#">#13a</a> | Report numbers of individuals | 9   |
| 53 |                |                      |                               |     |
| 54 |                |                      | at each stage of study—eg     |     |
| 55 |                |                      |                               |     |
| 56 |                |                      | numbers potentially eligible, |     |
| 57 |                |                      |                               |     |
| 58 |                |                      |                               |     |
| 59 |                |                      |                               |     |
| 60 |                |                      |                               |     |

|    |                  |                                                    |                                          |
|----|------------------|----------------------------------------------------|------------------------------------------|
| 1  |                  | examined for eligibility,                          |                                          |
| 2  |                  | confirmed eligible, included in                    |                                          |
| 3  |                  | the study, completing follow-                      |                                          |
| 4  |                  | up, and analysed. Give                             |                                          |
| 5  |                  | information separately for for                     |                                          |
| 6  |                  | exposed and unexposed                              |                                          |
| 7  |                  | groups if applicable.                              |                                          |
| 8  |                  |                                                    |                                          |
| 9  |                  |                                                    |                                          |
| 10 |                  |                                                    |                                          |
| 11 |                  |                                                    |                                          |
| 12 |                  |                                                    |                                          |
| 13 |                  |                                                    |                                          |
| 14 |                  |                                                    |                                          |
| 15 |                  |                                                    |                                          |
| 16 |                  |                                                    |                                          |
| 17 | Participants     | <a href="#">#13b</a> Give reasons for non-         | 9                                        |
| 18 |                  | participation at each stage                        |                                          |
| 19 |                  |                                                    |                                          |
| 20 |                  |                                                    |                                          |
| 21 |                  |                                                    |                                          |
| 22 | Participants     | <a href="#">#13c</a> Consider use of a flow        | n/a                                      |
| 23 |                  | diagram                                            |                                          |
| 24 |                  |                                                    |                                          |
| 25 |                  |                                                    |                                          |
| 26 |                  |                                                    |                                          |
| 27 |                  |                                                    |                                          |
| 28 | Descriptive data | <a href="#">#14a</a> Give characteristics of study | 9,10,11,12,13,25,26,27,28,29,30,31,32,33 |
| 29 |                  | participants (eg demographic,                      |                                          |
| 30 |                  | clinical, social) and                              |                                          |
| 31 |                  | information on exposures and                       |                                          |
| 32 |                  | potential confounders. Give                        |                                          |
| 33 |                  | information separately for                         |                                          |
| 34 |                  | exposed and unexposed                              |                                          |
| 35 |                  | groups if applicable.                              |                                          |
| 36 |                  |                                                    |                                          |
| 37 |                  |                                                    |                                          |
| 38 |                  |                                                    |                                          |
| 39 |                  |                                                    |                                          |
| 40 |                  |                                                    |                                          |
| 41 |                  |                                                    |                                          |
| 42 |                  |                                                    |                                          |
| 43 |                  |                                                    |                                          |
| 44 |                  |                                                    |                                          |
| 45 |                  |                                                    |                                          |
| 46 |                  |                                                    |                                          |
| 47 | Descriptive data | <a href="#">#14b</a> Indicate number of            | 25,26,27,28                              |
| 48 |                  | participants with missing data                     |                                          |
| 49 |                  | for each variable of interest                      |                                          |
| 50 |                  |                                                    |                                          |
| 51 |                  |                                                    |                                          |
| 52 |                  |                                                    |                                          |
| 53 |                  |                                                    |                                          |
| 54 | Outcome data     | <a href="#">#15</a> Report numbers of outcome      | 30,31,32,33                              |
| 55 |                  | events or summary                                  |                                          |
| 56 |                  |                                                    |                                          |
| 57 |                  |                                                    |                                          |
| 58 |                  |                                                    |                                          |
| 59 |                  |                                                    |                                          |
| 60 |                  |                                                    |                                          |

measures. Give information separately for exposed and unexposed groups if applicable.

|    |                |                                                 |                           |
|----|----------------|-------------------------------------------------|---------------------------|
| 1  |                |                                                 |                           |
| 2  |                |                                                 |                           |
| 3  |                |                                                 |                           |
| 4  |                |                                                 |                           |
| 5  |                |                                                 |                           |
| 6  |                |                                                 |                           |
| 7  |                |                                                 |                           |
| 8  |                |                                                 |                           |
| 9  |                |                                                 |                           |
| 10 | Main results   | <a href="#">#16a</a> Give unadjusted estimates  | 11,12                     |
| 11 |                |                                                 |                           |
| 12 |                | and, if applicable,                             |                           |
| 13 |                |                                                 |                           |
| 14 |                | confounder-adjusted                             |                           |
| 15 |                | estimates and their precision                   |                           |
| 16 |                | (eg, 95% confidence interval).                  |                           |
| 17 |                | Make clear which                                |                           |
| 18 |                | confounders were adjusted                       |                           |
| 19 |                | for and why they were                           |                           |
| 20 |                | included                                        |                           |
| 21 |                |                                                 |                           |
| 22 |                |                                                 |                           |
| 23 |                |                                                 |                           |
| 24 |                |                                                 |                           |
| 25 |                |                                                 |                           |
| 26 |                |                                                 |                           |
| 27 |                |                                                 |                           |
| 28 |                |                                                 |                           |
| 29 |                |                                                 |                           |
| 30 |                |                                                 |                           |
| 31 | Main results   | <a href="#">#16b</a> Report category boundaries | 10,11,29                  |
| 32 |                |                                                 |                           |
| 33 |                | when continuous variables                       |                           |
| 34 |                | were categorized                                |                           |
| 35 |                |                                                 |                           |
| 36 |                |                                                 |                           |
| 37 |                |                                                 |                           |
| 38 |                |                                                 |                           |
| 39 | Main results   | <a href="#">#16c</a> If relevant, consider      | n/a                       |
| 40 |                |                                                 |                           |
| 41 |                | translating estimates of                        |                           |
| 42 |                | relative risk into absolute risk                |                           |
| 43 |                | for a meaningful time period                    |                           |
| 44 |                |                                                 |                           |
| 45 |                |                                                 |                           |
| 46 |                |                                                 |                           |
| 47 |                |                                                 |                           |
| 48 |                |                                                 |                           |
| 49 | Other analyses | <a href="#">#17</a> Report other analyses done— | 9,10,11,13,17,30,31,32,33 |
| 50 |                |                                                 |                           |
| 51 |                | e.g., analyses of subgroups                     |                           |
| 52 |                | and interactions, and                           |                           |
| 53 |                | sensitivity analyses                            |                           |
| 54 |                |                                                 |                           |
| 55 |                |                                                 |                           |
| 56 |                |                                                 |                           |
| 57 |                |                                                 |                           |
| 58 |                |                                                 |                           |
| 59 |                |                                                 |                           |
| 60 |                |                                                 |                           |

**Discussion**

- 1  
2  
3
- 4 **Key results** [#18](#) Summarise key results with 14,15,16  
5  
6 reference to study objectives  
7  
8
- 9 **Limitations** [#19](#) Discuss limitations of the 17  
10  
11 study, taking into account  
12  
13 sources of potential bias or  
14  
15 imprecision. Discuss both  
16  
17 direction and magnitude of  
18  
19 any potential bias.  
20  
21  
22
- 23 **Interpretation** [#20](#) Give a cautious overall 14,15,16  
24  
25 interpretation considering  
26  
27 objectives, limitations,  
28  
29 multiplicity of analyses,  
30  
31 results from similar studies,  
32  
33 and other relevant evidence.  
34  
35  
36  
37
- 38 **Generalisability** [#21](#) Discuss the generalisability 17  
39  
40 (external validity) of the study  
41  
42 results  
43  
44
- 45 **Other**  
46  
47 **Information**  
48  
49
- 50 **Funding** [#22](#) Give the source of funding 18  
51  
52 and the role of the funders for  
53  
54 the present study and, if  
55  
56  
57  
58  
59  
60

1 applicable, for the original  
2  
3 study on which the present  
4  
5 article is based  
6  
7

8 Notes:  
9

- 10  
11 • 14a: 9,10,11,12,13,25,26,27,28,29,30,31,32,33  
12  
13  
14 • 14b: 25,26,27,28  
15  
16  
17 • 15: 30,31,32,33  
18  
19  
20 • 17: 9,10,11,13,17,30,31,32,33 The STROBE checklist is distributed under the terms of the  
21 Creative Commons Attribution License CC-BY. This checklist was completed on 19. June 2020  
22 using <https://www.goodreports.org/>, a tool made by the [EQUATOR Network](#) in collaboration with  
23 [Penelope.ai](#)  
24  
25  
26  
27  
28  
29  
30  
31  
32  
33  
34  
35  
36  
37  
38  
39  
40  
41  
42  
43  
44  
45  
46  
47  
48  
49  
50  
51  
52  
53  
54  
55  
56  
57  
58  
59  
60
