# Supplementary material for: Impact of the 2017 ACC/AHA guideline on the prevalence of elevated blood pressure and hypertension: a cross-sectional analysis of 10 799 individuals
Source: PubMed Central journal article supplement — BMJ Open. 2020 Dec 30;10(12):e041973. doi: 10.1136/bmjopen-2020-041973 (PMC7780512; doi:10.1136/bmjopen-2020-041973), 2020-12-30
Supplement: bmjopen-2020-041973supp001.pdf [file bmjopen-2020-041973supp001.pdf]

**Supplementary table 1. Determinants of hypertension according to guidelines among Saudi Biobank, 2017-2020 (n = 10799)**

| Characteristics          | ACC/AHA          |                  |       | JNC-7            |                   |       |
|--------------------------|------------------|------------------|-------|------------------|-------------------|-------|
|                          | OR (95% CI)      | AOR (95% CI)     | P     | OR (95% CI)      | AOR (95% CI)      | P     |
| <b>Gender</b>            |                  |                  |       |                  |                   |       |
| Women                    | 1.0              | 1.0              |       | 1.0              | 1.0               |       |
| Men                      | 1.80 (1.67,1.95) | 2.79 (2.51,3.11) | <0.01 | 1.95 (1.74,2.18) | 3.10 (2.66,3.60)  | <0.01 |
| <b>Age (years)</b>       |                  |                  |       |                  |                   |       |
| 18-29                    | 1.0              | 1.0              |       | 1.0              | 1.0               |       |
| 30-39                    | 1.43 (1.31,1.57) | 1.27 (1.13,1.44) | <0.01 | 1.42 (1.25,1.62) | 1.39 (1.16,1.67)  | <0.01 |
| 40-49                    | 2.34 (2.06,2.66) | 1.70 (1.44,2.02) | <0.01 | 3.14 (2.69,3.66) | 2.55 (2.03,3.19)  | <0.01 |
| 50-59                    | 3.77 (2.98,3.78) | 2.28 (1.72,3.03) | <0.01 | 4.82 (3.79,6.13) | 3.23 (2.34,4.44)  | <0.01 |
| ≥60                      | 4.39 (2.68,7.17) | 2.09 (1.20,3.63) | 0.009 | 4.53 (2.81,7.28) | 2.21 (1.26,3.87)  | <0.01 |
| <b>Marital status</b>    |                  |                  |       |                  |                   |       |
| Never married            | 1.0              | 1.0              |       | 1.0              | 1.0               |       |
| Married                  | 1.53 (1.41,1.65) | 0.91 (0.81,1.02) | 0.12  | 1.60 (1.43,1.78) | 0.73 (0.61,0.87)  | <0.01 |
| Divorced, separated      | 1.45 (1.14,1.85) | 1.07 (0.81,1.41) | 0.67  | 1.64 (1.19,2.26) | 0.95 (0.66,1.38)  | 0.66  |
| <b>Education</b>         |                  |                  |       |                  |                   |       |
| < Primary school         | 1.0              | 1.0              |       | 1.0              | 1.0               |       |
| Primary school           | 1.04 (0.66,1.63) | 1.11 (0.69,1.79) | 0.65  | 1.08 (0.66,1.75) | 1.18 (0.70,1.98)  | 0.53  |
| Intermediate school      | 0.71 (0.47,1.08) | 0.82 (0.52,1.28) | 0.37  | 0.73 (0.46,1.16) | 0.84 (0.51,1.39)  | 0.47  |
| High school              | 0.43 (0.30,0.62) | 0.75 (0.49,1.12) | 0.15  | 0.39 (0.26,0.59) | 0.78 (0.49,1.23)  | 0.26  |
| Some college             | 0.65 (0.44,0.97) | 1.01 (0.65,1.56) | 0.98  | 0.58 (0.37,0.89) | 1.00 (0.61,1.65)  | 0.95  |
| Bachelor's degree        | 0.47 (0.32,0.68) | 0.86 (0.57,1.31) | 0.47  | 0.37 (0.25,0.56) | 0.78 (0.49,1.25)  | 0.27  |
| Higher education         | 0.47 (0.31,0.72) | 0.80 (0.49,1.29) | 0.34  | 0.44 (0.27,0.73) | 0.79 (0.45,1.41)  | 0.37  |
| <b>Employment status</b> |                  |                  |       |                  |                   |       |
| Employed                 | 1.0              | 1.0              |       | 1.0              | 1.0               |       |
| Unemployed               | 0.87 (0.75,1.00) | 1.27 (1.04,1.55) | 0.01  | 0.89 (0.72,1.08) | 1.35 (1.03,1.78)  | 0.02  |
| Student                  | 0.83 (0.76,0.91) | 1.36 (1.14,1.63) | <0.01 | 0.75 (0.65,0.86) | 1.60 (0.90, 1.50) | 0.21  |
| Retired/others           | 1.21 (1.07,1.37) | 1.21 (1.00,1.45) | 0.03  | 1.35 (1.15,1.58) | 1.24 (0.96,1.59)  | 0.07  |
| <b>Income</b>            |                  |                  |       |                  |                   |       |
| ≤5000                    | 1.0              | 1.0              |       | 1.0              | 1.0               |       |
| 5001 - 10,000            | 0.98 (0.89,1.08) | 0.86 (0.72,1.03) | 0.12  | 0.95 (0.83,1.09) | 0.76 (0.60,0.97)  | 0.04  |
| 1,0001 - 15,000          | 1.45 (1.27,1.65) | 1.03 (0.83,1.27) | 0.66  | 1.45 (1.22,1.72) | 0.94 (0.71,1.25)  | 0.80  |
| 15,001 – 20,000          | 1.63 (1.34,1.99) | 1.08 (0.82,1.43) | 0.45  | 1.68 (1.31,2.15) | 0.98 (0.69,1.39)  | 0.92  |
| >20,000                  | 1.59 (1.22,2.06) | 0.85 (0.61,1.20) | 0.45  | 1.90 (1.40,2.58) | 0.89 (0.58,1.37)  | 0.83  |
| <b>Vigorous exercise</b> |                  |                  |       |                  |                   |       |
| Never                    | 1.0              | 1.0              |       | 1.0              | 1.0               |       |
| 1                        | 0.85 (0.73,0.99) | 0.79 (0.67,0.94) | <0.01 | 0.84 (0.68,1.05) | 1.17 (0.93,1.48)  | 0.18  |

|                               |                   |                  |       |                   |                  |       |
|-------------------------------|-------------------|------------------|-------|-------------------|------------------|-------|
| 2-3                           | 0.73 (0.63,0.84)  | 0.75 (0.65,0.88) | <0.01 | 0.67 (0.54,0.83)  | 0.87 (0.64,1.18) | 0.36  |
| 4-5                           | 0.68 (0.58,0.79)  | 0.68 (0.57,0.81) | <0.01 | 0.59 (0.46,0.76)  | 0.75 (0.54,1.04) | 0.08  |
| >5                            | 0.69 (0.57,0.82)  | 0.72 (0.59,0.87) | <0.01 | 0.57 (0.43,0.76)  | 0.76 (0.53,1.10) | 0.14  |
| <b>Time standing at work</b>  |                   |                  |       |                   |                  |       |
| Never                         | 1.0               | 1.0              |       | 1.0               | 1.0              |       |
| A few times                   | 1.09 (0.81,1.46)  | 1.09 (0.80,1.50) | 0.56  | 2.32 (1.34,4.02)  | 2.60 (1.47,4.62) | <0.01 |
| Sometimes                     | 1.16 (0.86,1.55)  | 1.18 (0.86,1.62) | 0.28  | 2.27 (1.31,3.94)  | 2.60 (1.47,4.62) | <0.01 |
| Most of the times             | 0.95 (0.70,1.28)  | 1.03 (0.74,1.42) | 0.84  | 2.10 (1.20,3.67)  | 2.66 (1.48,4.76) | <0.01 |
| All the times                 | 0.87 (0.55,1.37)  | 0.95 (0.58,1.55) | 0.86  | 1.56 (0.71,3.39)  | 1.92 (0.85,4.34) | 0.11  |
| <b>Tobacco use</b>            |                   |                  |       |                   |                  |       |
| No                            | 1.0               | 1.0              |       | 1.0               | 1.0              |       |
| Yes                           | 0.96 (0.87,1.07)  | 0.75 (0.66,0.85) | <0.01 | 1.01 (0.87,1.17)  | 0.79 (0.67,0.93) | <0.01 |
| <b>Diabetes</b>               |                   |                  |       |                   |                  |       |
| No                            | 1.0               | 1.0              |       | 1.0               | 1.0              |       |
| Yes                           | 2.55 (2.17,3.00)  | 1.67 (1.40,1.99) | <0.01 | 2.48 (2.39,3.39)  | 1.64 (1.34,2.00) | <0.01 |
| <b>BMI (kg/m<sup>2</sup>)</b> |                   |                  |       |                   |                  |       |
| Underweight                   | 1.0               | 1.0              |       | 1.0               | 1.0              |       |
| Normal weight                 | 1.69 (1.39,2.05)  | 1.67 (1.37,2.04) | <0.01 | 1.70 (1.20,2.41)  | 1.67 (1.17,2.38) | <0.01 |
| Overweight                    | 3.03 (2.49,3.69)  | 2.43 (1.97,3.00) | <0.01 | 3.01 (2.13,4.24)  | 2.15 (1.50,3.08) | <0.01 |
| Obese                         | 4.86 (3.97,5.94)  | 3.17 (2.52,3.99) | <0.01 | 5.51 (3.90,7.77)  | 2.97 (2.04,4.34) | <0.01 |
| Extremely Obese               | 7.90 (5.78,10.79) | 4.64 (3.31,6.52) | <0.01 | 10.62(7.04,16.01) | 5.24 (3.35,8.19) | <0.01 |
| <b>Waist Circum.</b>          |                   |                  |       |                   |                  |       |
| Normal                        | 1.0               | 1.0              |       | 1.0               | 1.0              |       |
| Not Normal                    | 2.58 (2.38,2.79)  | 1.32 (1.17,1.50) | <0.01 | 3.07 (2.75,3.43)  | 1.53 (1.29,1.81) | <0.01 |
| <b>Waist to hip ratio</b>     |                   |                  |       |                   |                  |       |
| Normal                        | 1.0               | 1.0              |       | 1.0               | 1.0              |       |
| Not Normal                    | 1.99 (1.81,2.20)  | 1.27 (1.13,1.43) | <0.01 | 2.18 (1.93,2.45)  | 1.19 (1.02,1.38) | 0.02  |

Waist Circumference: (men<94, women <80), Waist to hip ratio: (men<0.95, women <0.80), AOR: Adjusted OR.

**Supplementary table 2. The percentage and determinants of elevated BP according to 2017 ACC/AHA Guideline among Saudi Biobank, 2017-2020 (n = 10799)**

| Characteristics              | Elevated BP according to 2017 ACC/AHA Guideline |                  |                  |         |
|------------------------------|-------------------------------------------------|------------------|------------------|---------|
|                              | Percentage (95% CI)                             | OR (95% CI)      | AOR (95% CI)     | P-value |
| Overall                      | 15.82 (15.69,15.94)                             | -                | -                | -       |
| <b>Gender</b>                |                                                 |                  |                  |         |
| Women                        | 14.07 (13.90,14.24)                             | 1.0              | 1.0              |         |
| Men                          | 17.50 (17.32,17.68)                             | 1.29 (1.17,1.44) | 1.35 (1.19,1.54) | <0.01   |
| <b>Age, years</b>            |                                                 |                  |                  |         |
| 18-29                        | 17.64 (17.47,17.82)                             | 1.0              | 1.0              |         |
| 30-39                        | 13.95 (13.73,14.17)                             | 0.76 (0.67,0.85) | 0.76 (0.66,0.88) | <0.01   |
| 40-49                        | 12.83 (12.47,13.18)                             | 0.69 (0.57,0.83) | 0.71 (0.58,0.87) | <0.01   |
| 50-59                        | 11.35 (10.73,11.98)                             | 0.60 (0.42,0.85) | 0.62 (0.43,0.89) | <0.01   |
| ≥60                          | 10.39 (9.15,11.63)                              | 0.54 (0.26,1.13) | 0.54 (0.26,1.15) | 0.08    |
| <b>Employment</b>            |                                                 |                  |                  |         |
| Employed                     | 15.51 (15.34,15.69)                             | 1.0              | 1.0              |         |
| Unemployed                   | 16.10 (15.68,16.52)                             | 1.04 (0.87,1.26) | 1.15 (0.94,1.41) | 0.11    |
| Student                      | 17.62 (17.37,17.87)                             | 1.16 (1.03,1.31) | 1.11 (0.96,1.29) | 0.10    |
| Retired/others               | 12.81 (12.48,13.14)                             | 0.80 (0.67,0.96) | 1.01 (0.83,1.24) | 0.52    |
| <b>Time sitting at work</b>  |                                                 |                  |                  |         |
| Never                        | 8.02 (7.12,8.92)                                | 1.0              | 1.0              |         |
| A few times                  | 15.80 (15.53,16.07)                             | 2.15 (1.08,4.30) | 2.39 (1.19,4.77) | 0.02    |
| Sometimes                    | 16.41 (16.17,16.65)                             | 2.25 (1.13,4.48) | 2.59 (1.30,5.17) | 0.01    |
| Most of the times            | 15.66(15.47,15.84)                              | 2.13 (1.07,4.23) | 2.34 (1.17,4.66) | 0.03    |
| All the times                | 15.44 (14.70,16.17)                             | 2.10 (0.99,4.42) | 2.10 (0.99,4.44) | 0.08    |
| <b>Current smoker</b>        |                                                 |                  |                  |         |
| No                           | 15.62 (15.48,15.75)                             | 1.0              | 1.0              |         |
| Yes                          | 16.80 (16.49,17.12)                             | 1.09 (0.95,1.25) | 0.97 (0.83,1.12) | 0.72    |
| <b>Diabetes</b>              |                                                 |                  |                  |         |
| No                           | 15.76 (15.60,15.92)                             | 1.0              | 1.0              |         |
| Yes                          | 15.91 (15.71,16.11)                             | 0.99 (0.89,1.10) | 1.03 (0.93,1.15) | 0.61    |
| <b>BMI, kg/m<sup>2</sup></b> |                                                 |                  |                  |         |
| Underweight                  | 12.14 (11.69,12.59)                             | 1.0              | 1.0              |         |
| Normal weight                | 16.30 (16.10,16.50)                             | 1.41 (1.10,1.80) | 1.48 (1.16,1.89) | <0.01   |
| Overweight                   | 16.47 (16.23,16.70)                             | 1.43 (1.11,1.83) | 1.64 (1.27,2.12) | <0.01   |
| Obese                        | 15.30 (15.04,15.56)                             | 1.31 (1.01,1.69) | 1.68 (1.26,2.24) | <0.01   |
| Extremely Obese              | 14.41 (13.65,15.16)                             | 1.22 (0.81,1.83) | 1.54 (1.00,2.37) | 0.04    |
| <b>Waist Circum. (cm)</b>    |                                                 |                  |                  |         |
| Normal                       | 16.36 (16.20,16.52)                             | 1.0              | 1.0              |         |
| Not Normal                   | 14.83 (14.62,15.03)                             | 0.89 (0.80,0.99) | 0.91 (0.77,1.07) | 0.21    |
| <b>WtHR</b>                  |                                                 |                  |                  |         |
| Normal                       | 16.27 (16.12,16.41)                             | 1.0              | 1.0              |         |
| Not Normal                   | 13.89 (13.62,14.17)                             | 0.83 (0.72,0.95) | 0.99 (0.84,1.16) | 0.93    |

Waist Circumference: (men<94, women <80), WtHR (Waist to hip ratio): (men<0.95, women <0.80), AOR: Adjusted OR, SR: Saudi Riyals.
